# Supplementary material for: Some Theoretical and Experimental Evidence for Particularities of the Siloxane Bond
Source: MDPI journal article supplement (doi:10.3390/molecules27238563), 2022-12-05
Supplement: s1 [file s1]

# Some theoretical and experimental evidence for particularities of the siloxane bond

Alexandru-Constantin Stoica,<sup>1</sup> Madalin Damoc,<sup>1</sup> Corneliu Cojocaru,<sup>1</sup> Alina Nicolescu,<sup>2</sup> Sergiu Shova,<sup>1</sup> Mihaela Dascalu<sup>1</sup> and Maria Cazacu<sup>1\*</sup>

<sup>1</sup>Department of Inorganic Polymers, "Petru Poni" Institute of Macromolecular Chemistry, Aleea Grigore Ghica Voda 41A, 700487 Iasi, Romania

<sup>2</sup>NMR Laboratory, "Petru Poni" Institute of Macromolecular Chemistry, Aleea Grigore Ghica Voda 41A, 700487 Iasi, Romania

\*Correspondence: mcazacu@icmpp.ro

## S1. FTIR analysis

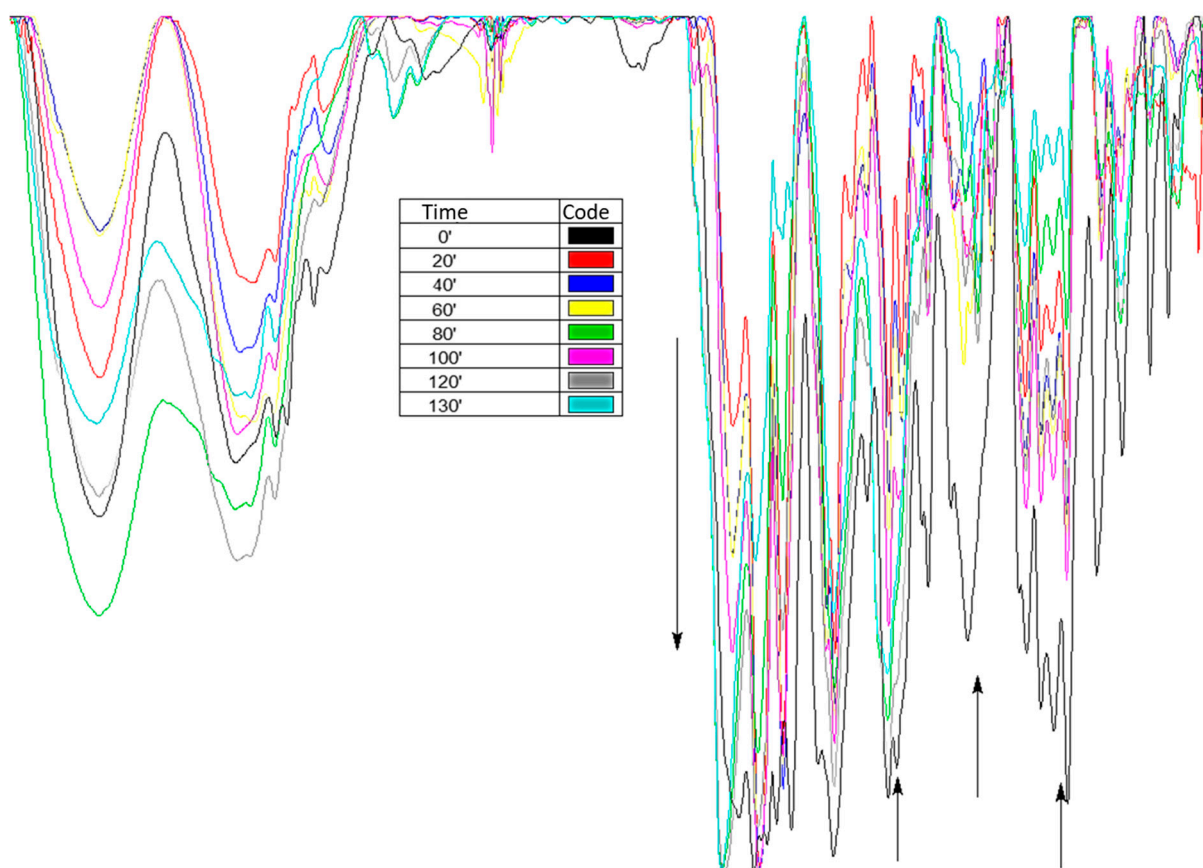

**Figure S1a.** Monitoring the reaction between AEAMDS and 3-formylsalicylic acid (3FSA)

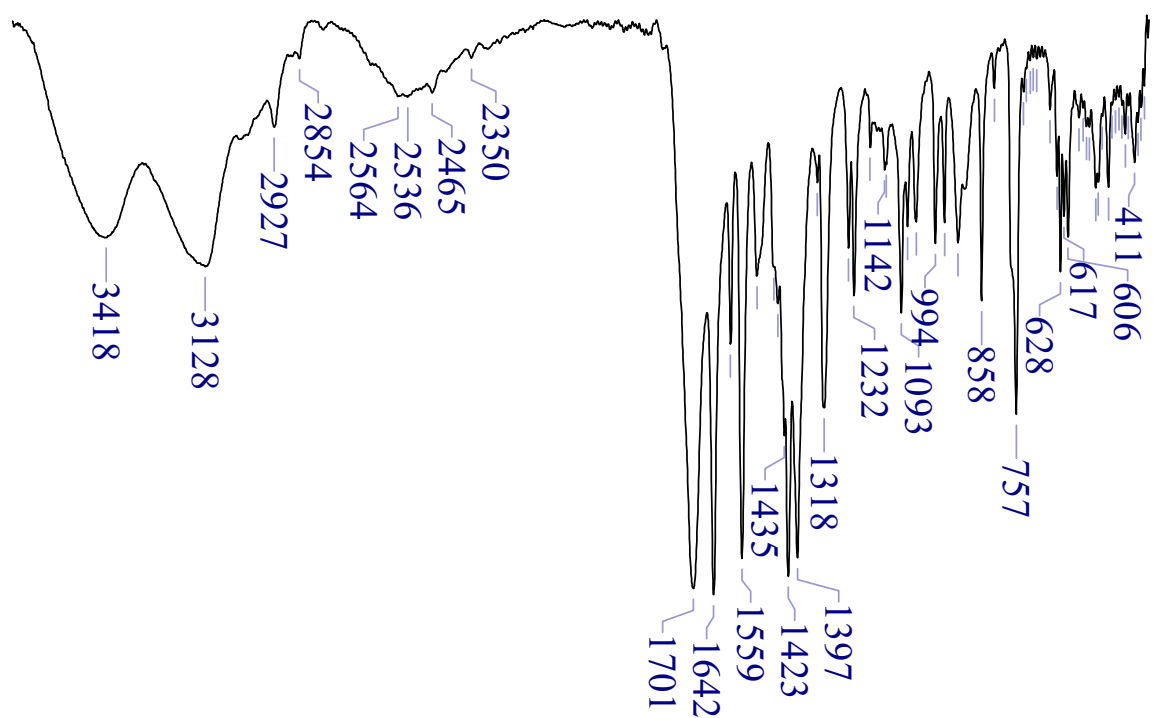

**Figure S1b.** FTIR spectra for a2

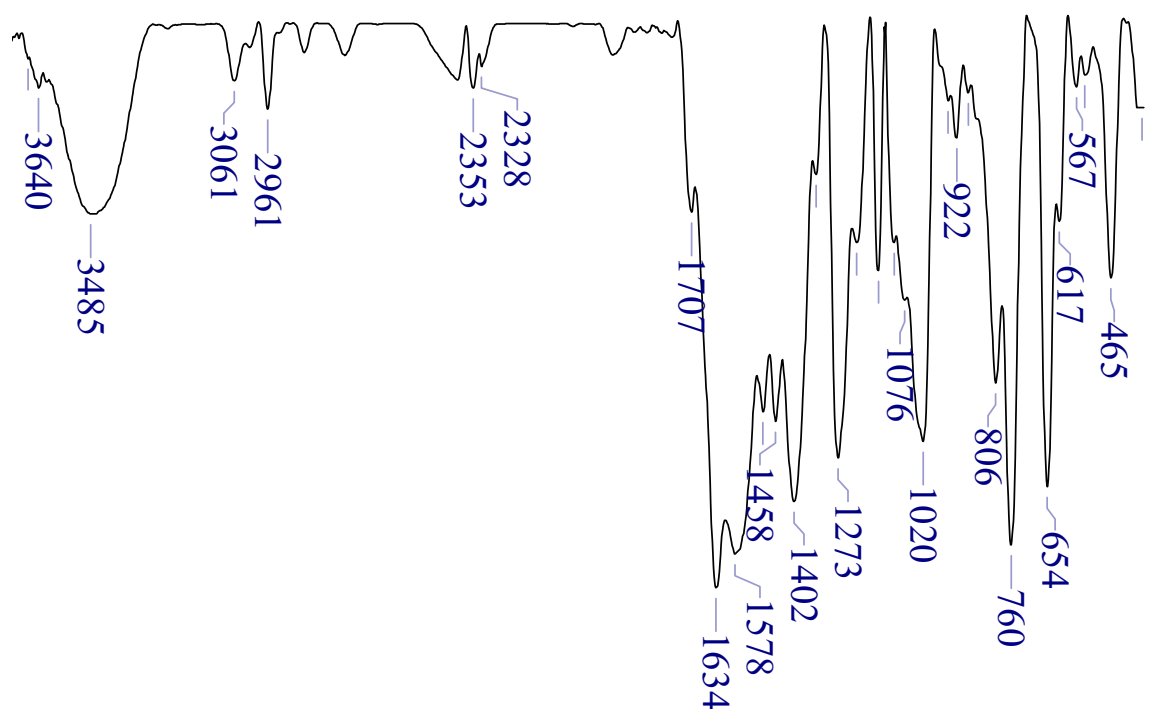

**Figure S1c.** FTIR spectra for a3

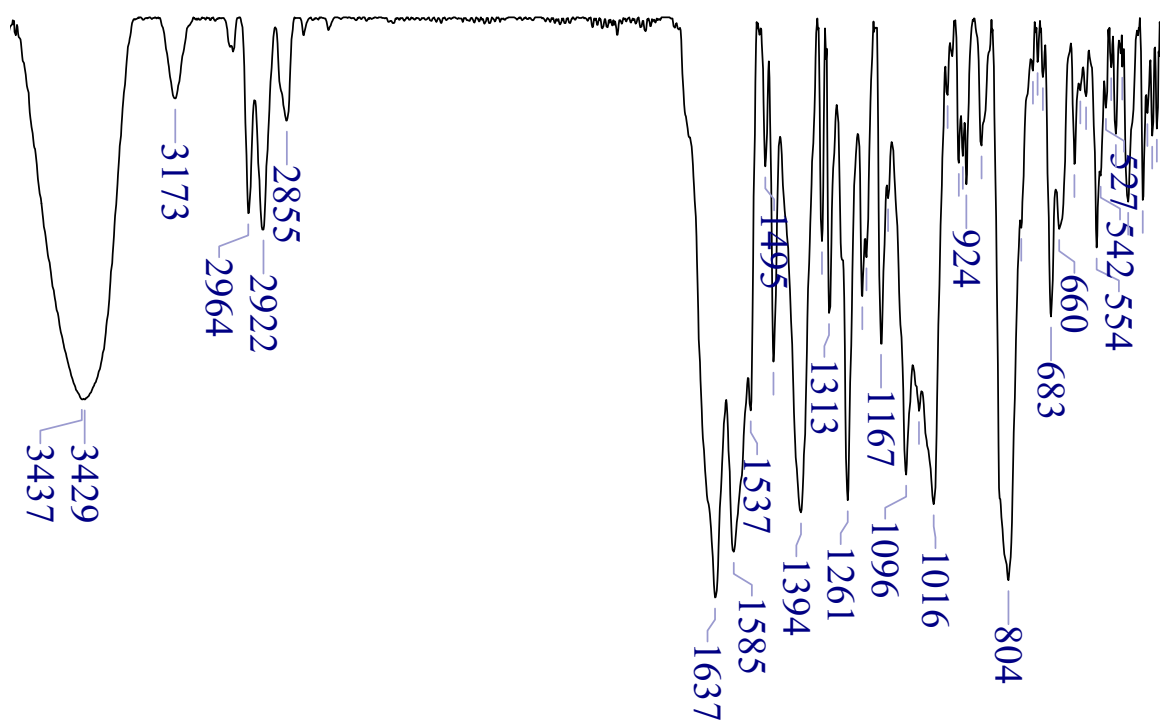

**Figure S1d.** FTIR spectra for a4

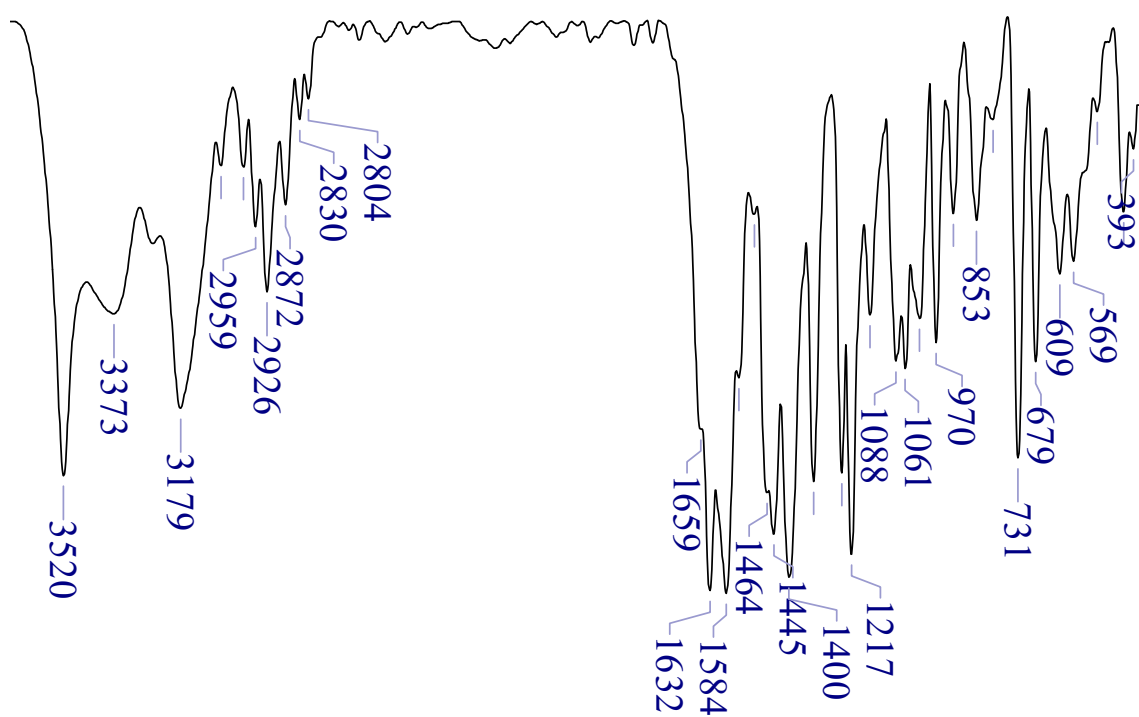

**Figure S1e.** FTIR spectra for a5

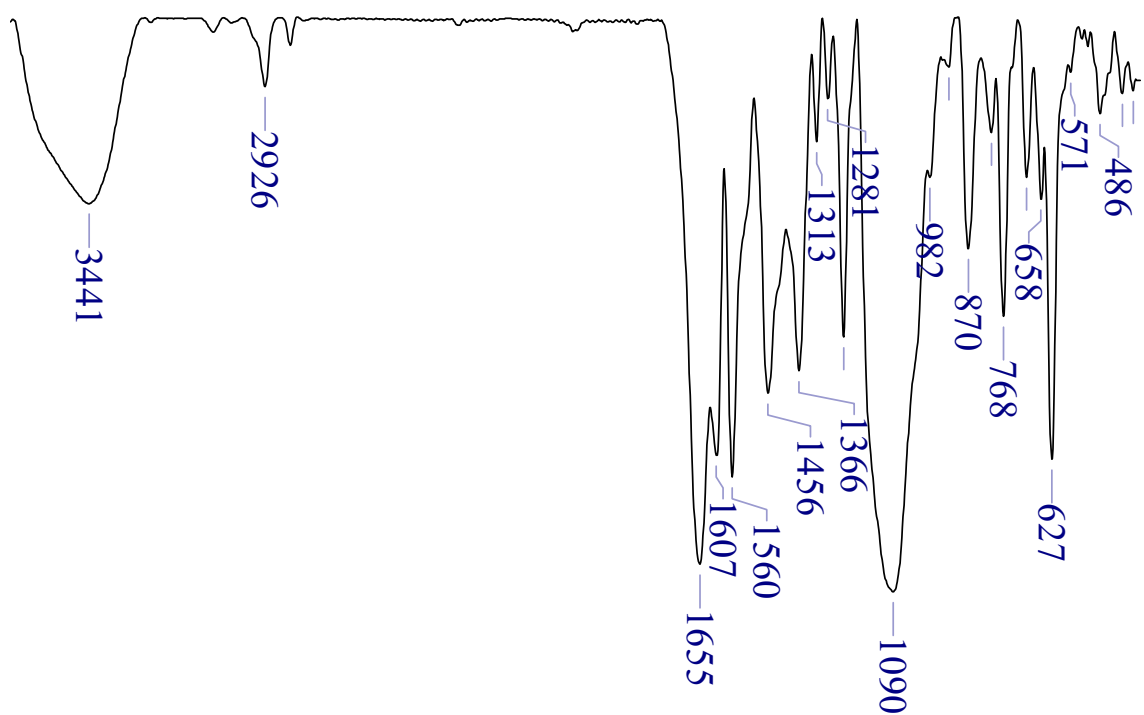

**Figure S1f.** FTIR spectra for b2

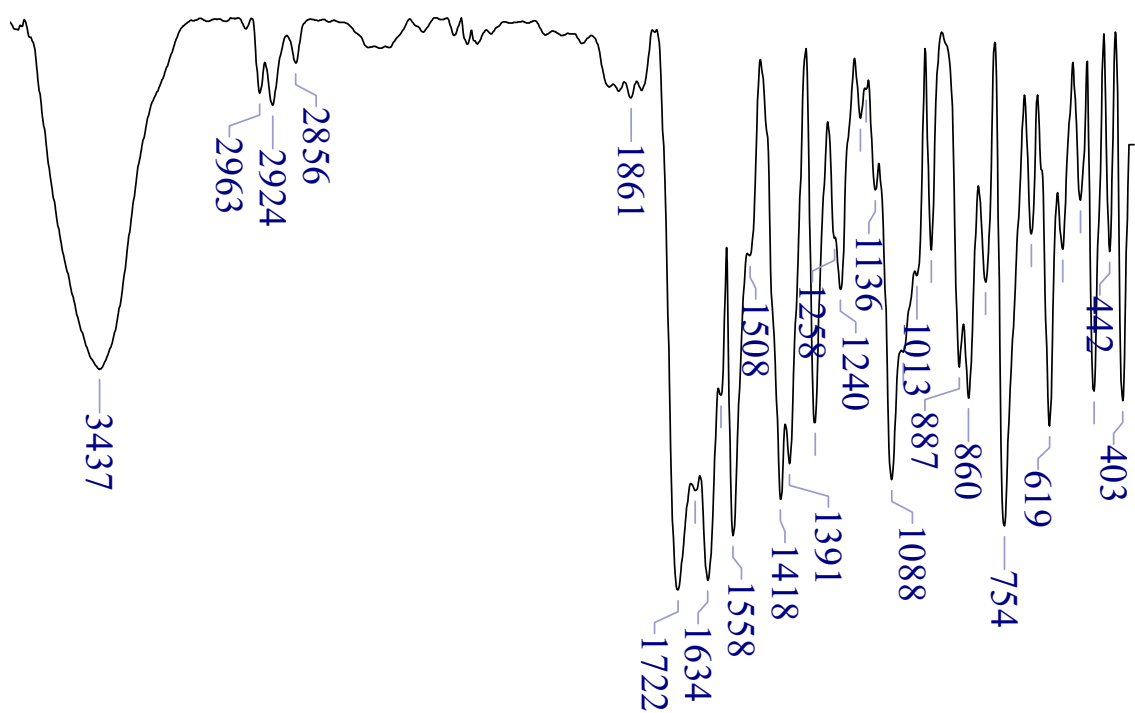

**Figure S1g.** FTIR spectra for b3

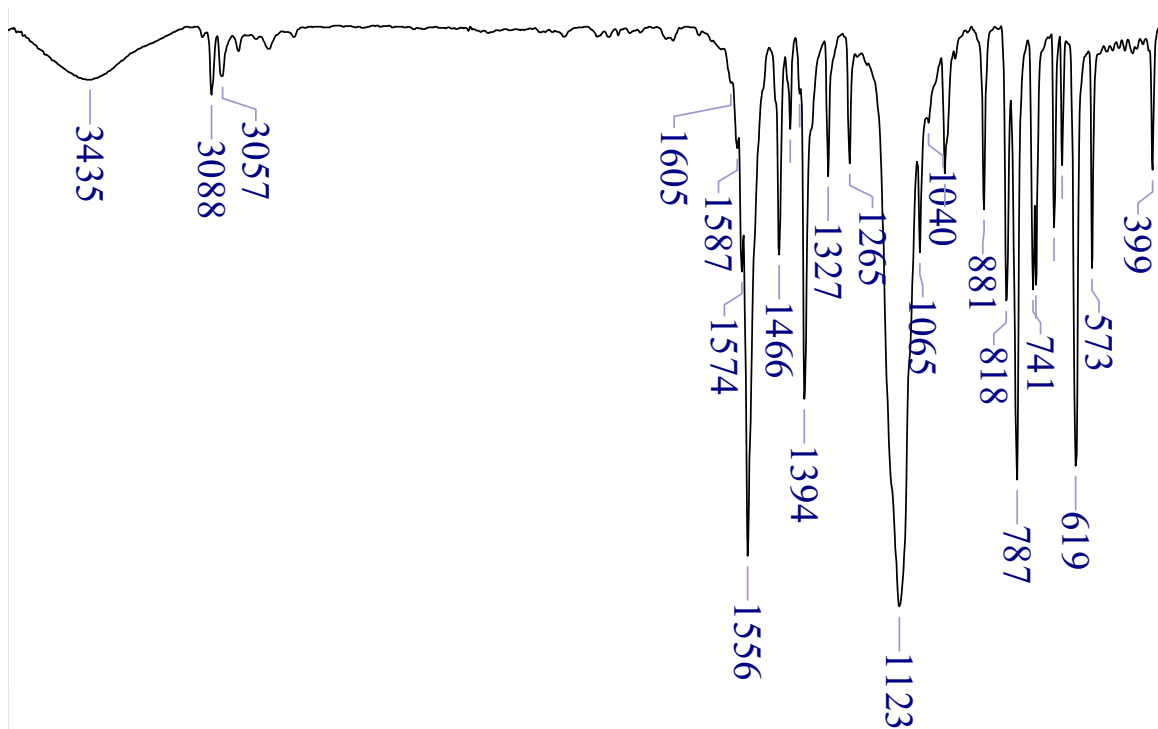

**Figure S1h.** FTIR spectra for b4

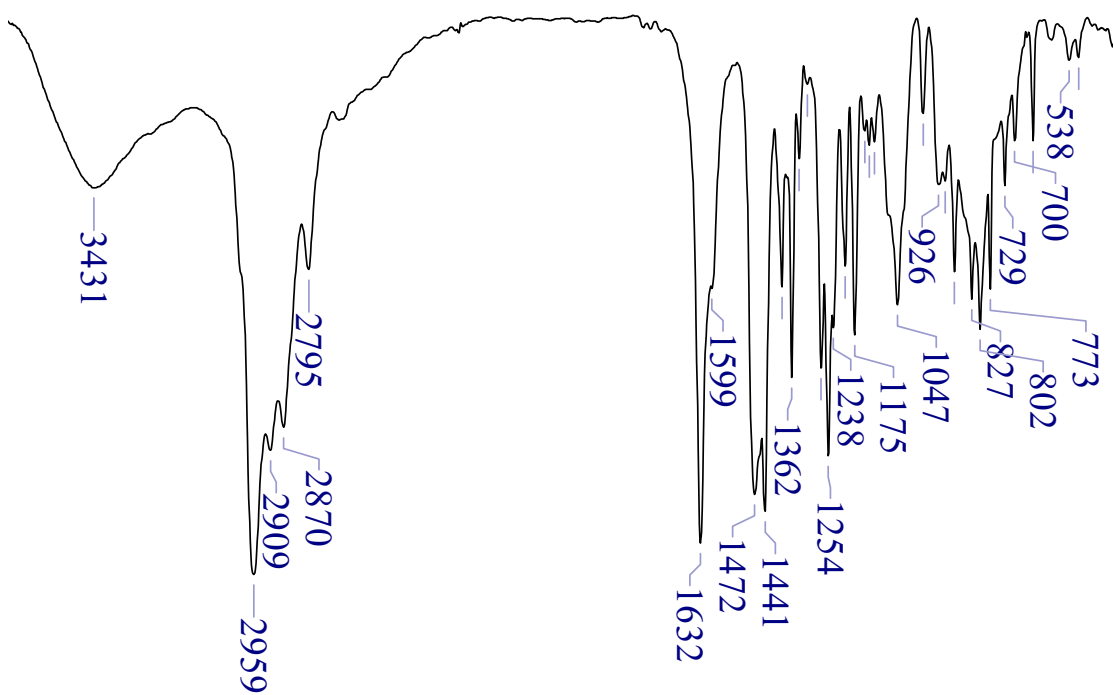

**Figure S1i.** FTIR spectra for c1

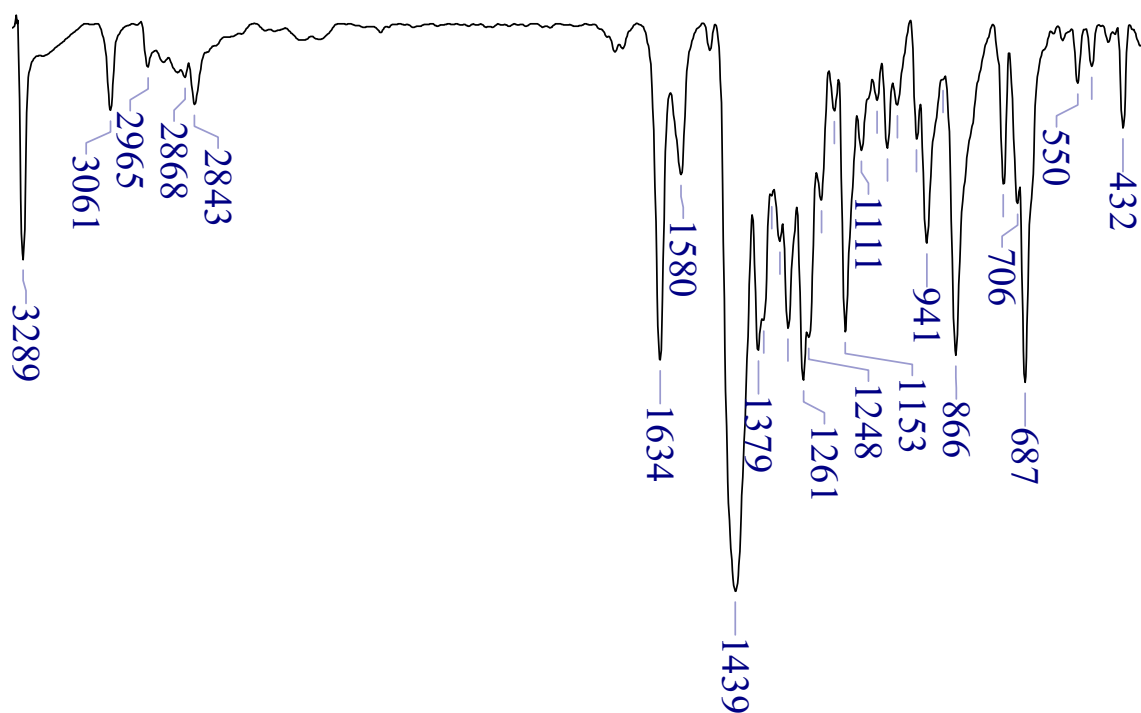

Figure S1j. FTIR spectra for c2

## S2. NMR analysis

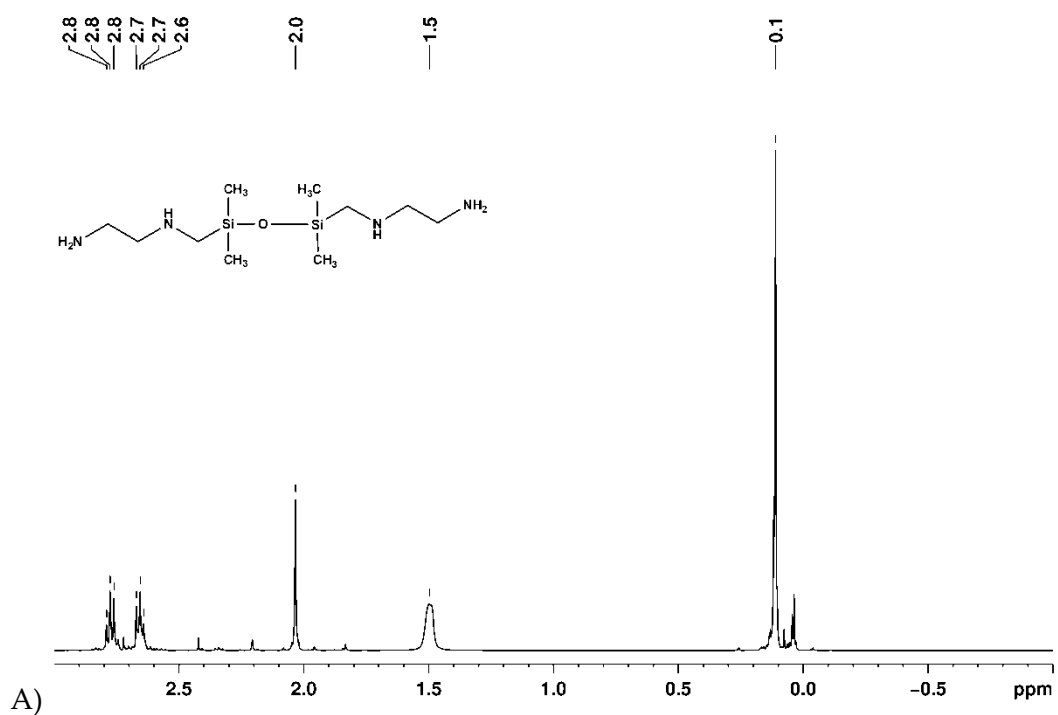

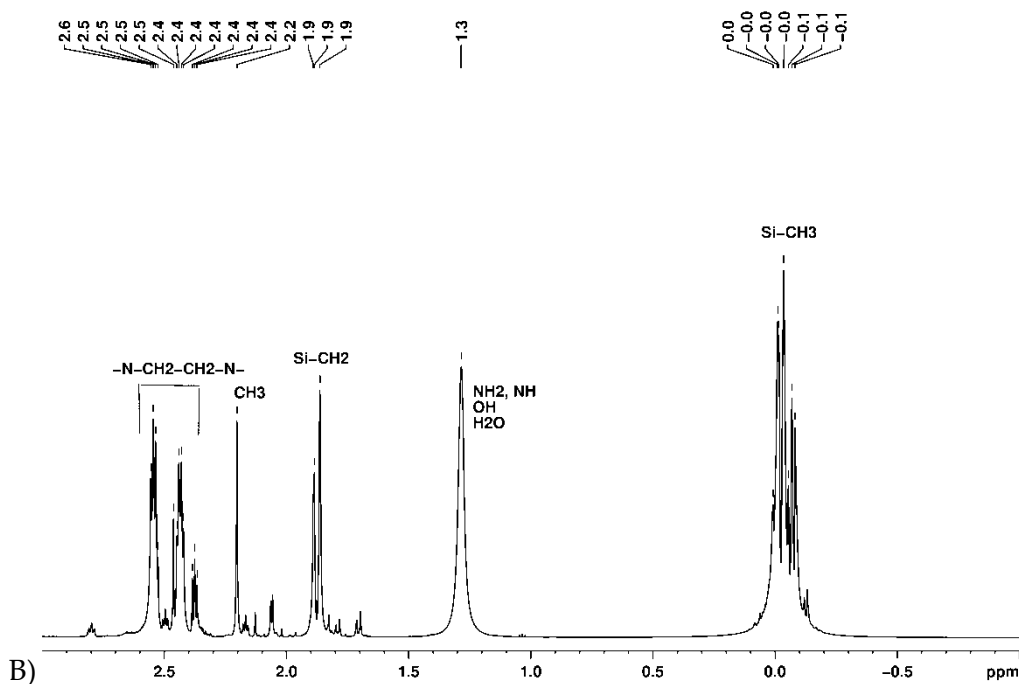

**Figure S2a.** A)  $^1\text{H}$  NMR spectrum of initial AEAMDS, recorded in  $\text{CDCl}_3$ , showing five main signals, as expected for the existing chemical structure; and B)  $^1\text{H}$  NMR spectrum of the same AEAMDS compound, neat, recorded after two year, showing a complex pattern that can be associated with the presence of several compounds.

NMR characteristics of the identified degradation compounds:

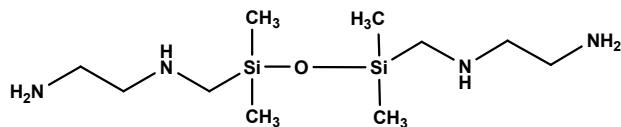

$^1\text{H}$ -NMR (600.1 MHz,  $\delta$ , neat) ppm: -0.06 (s,  $\text{CH}_3\text{-Si}$ ), 1.30 (NH and  $\text{NH}_2$ , overlapped with  $\text{H}_2\text{O}$ ), 1.85 (s,  $\text{CH}_2\text{-Si}$ ), 2.42 (t,  $J = 6$  Hz,  $\text{CH}_2\text{-NH}$ ), 2.54 (t,  $J = 6$  Hz,  $\text{CH}_2\text{-NH}_2$ ).

$^{13}\text{C}$ -NMR (150.9 MHz,  $\delta$ , neat) ppm: 1.5 ( $\text{CH}_3\text{-Si}$ ), 43.0 ( $\text{CH}_2\text{-Si}$ ), 43.4 ( $\text{CH}_2\text{-NH}_2$ ), 59.3 ( $\text{CH}_2\text{-NH}$ ).

$^{15}\text{N}$ -NMR (60.8 MHz,  $\delta$ , neat) ppm: 17.4 ( $\text{NH}_2$ ), 19.6 (NH).

$^{29}\text{Si}$ -NMR (79.5 MHz,  $\delta$ , neat) ppm: 4.63.

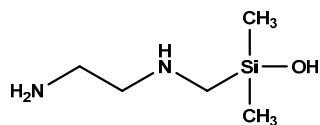

$^1\text{H}$ -NMR (600.1 MHz,  $\delta$ , neat) ppm: -0.00 (s,  $\text{CH}_3\text{-Si}$ ), 1.30 (NH and  $\text{NH}_2$ , overlapped with  $\text{H}_2\text{O}$ ), 1.88 (s,  $\text{CH}_2\text{-Si}$ ), 2.42 (t,  $J = 6$  Hz,  $\text{CH}_2\text{-NH}$ ), 2.54 (t,  $J = 6$  Hz,  $\text{CH}_2\text{-NH}_2$ ).

$^{13}\text{C}$ -NMR (150.9 MHz,  $\delta$ , neat) ppm: 1.4 ( $\text{CH}_3\text{-Si}$ ), 42.8 ( $\text{CH}_2\text{-Si}$ ), 43.4 ( $\text{CH}_2\text{-NH}_2$ ), 59.3 ( $\text{CH}_2\text{-NH}$ ).

$^{15}\text{N}$ -NMR (60.8 MHz,  $\delta$ , neat) ppm: 17.4 ( $\text{NH}_2$ ), 19.6 ( $\text{NH}$ ).

$^{29}\text{Si}$ -NMR (79.5 MHz,  $\delta$ , neat) ppm: 4.27.

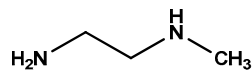

$^1\text{H}$ -NMR (600.1 MHz,  $\delta$ , neat) ppm: 1.30 ( $\text{NH}$  and  $\text{NH}_2$ , overlapped with  $\text{H}_2\text{O}$ ), 2.2 (s,  $\text{CH}_3\text{-NH}$ ), 2.38 (t,  $J = 6$  Hz,  $\text{CH}_2\text{-NH}$ ), 2.54 (t,  $J = 6$  Hz,  $\text{CH}_2\text{-NH}_2$ ).

$^{13}\text{C}$ -NMR (150.9 MHz,  $\delta$ , neat) ppm: 38.4 ( $\text{CH}_3\text{-NH}$ ), 43.6 ( $\text{CH}_2\text{-NH}_2$ ), 57.2 ( $\text{CH}_2\text{-NH}$ ).

$^{15}\text{N}$ -NMR (60.8 MHz,  $\delta$ , neat) ppm: 17.7 ( $\text{NH}_2$ ), 19.6 ( $\text{NH}$ ).

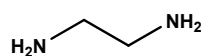

$^1\text{H}$ -NMR (600.1 MHz,  $\delta$ , neat) ppm: 2.45 (s,  $\text{CH}_2$ ).

$^{13}\text{C}$ -NMR (150.9 MHz,  $\delta$ , neat) ppm: 47.3 ( $\text{CH}_2$ ).

$^{15}\text{N}$ -NMR (60.8 MHz,  $\delta$ , neat) ppm: 16.9 ( $\text{NH}_2$ ).

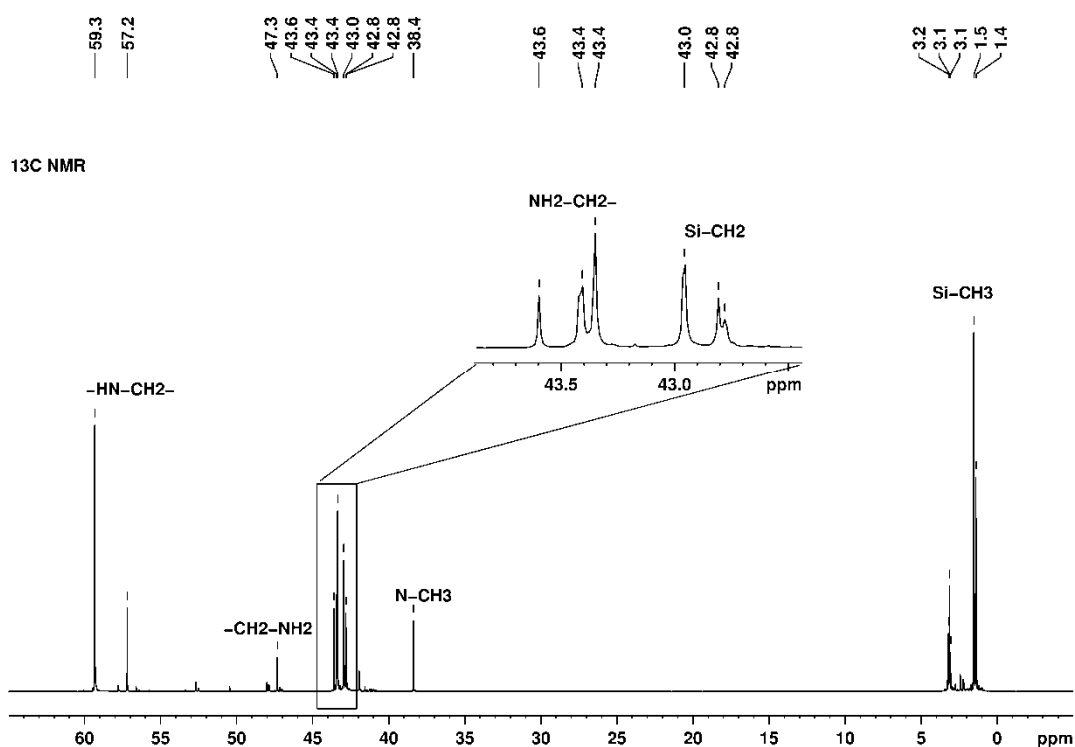

**Figure S2b.**  $^{13}\text{C}$ -NMR spectrum corresponding to degraded AEAMDS, recorded neat, with  $\text{DMSO}-d_6$  capillary.



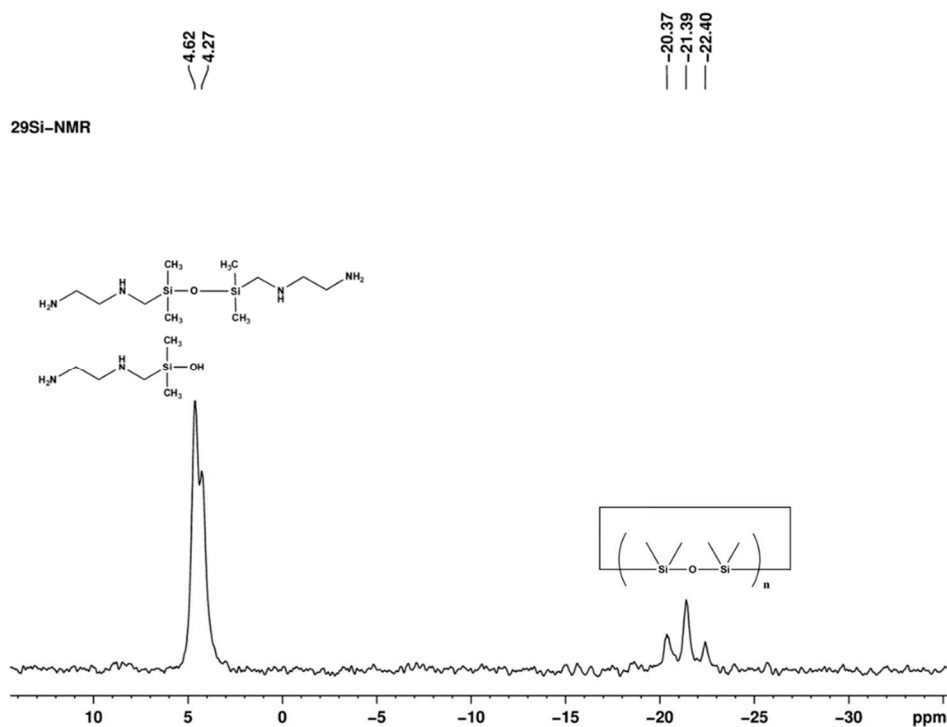

**Figure S2c.**  $^{29}\text{Si}$ -NMR spectrum corresponding to degraded AEAMDS, recorded neat, with DMSO- $\text{d}_6$  capillary.

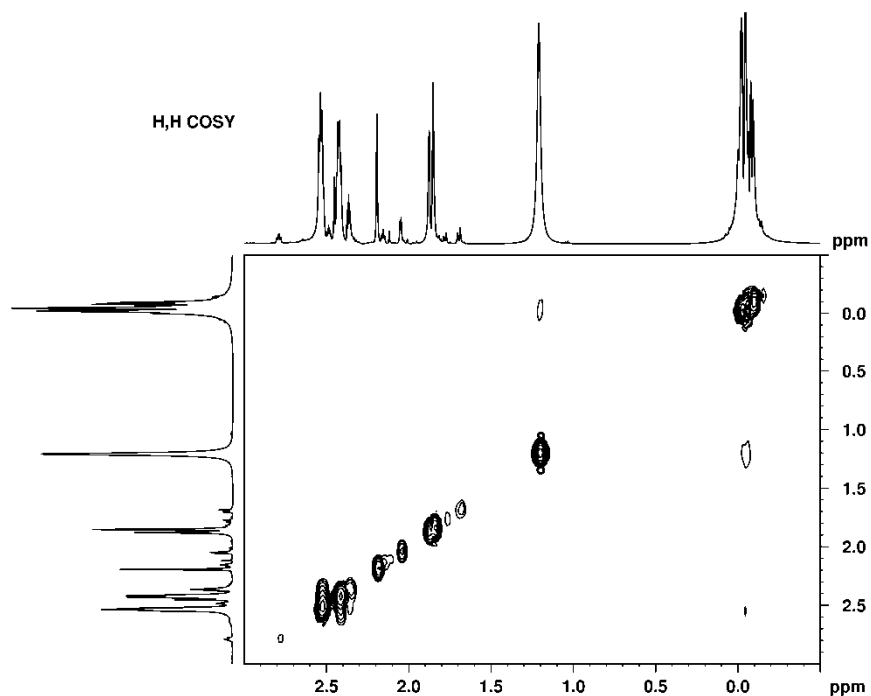

**Figure S2d.** H,H-COSY spectrum corresponding to degraded AEAMDS, recorded neat, with DMSO- $\text{d}_6$  capillary, showing the vicinal couplings between the methylene groups.

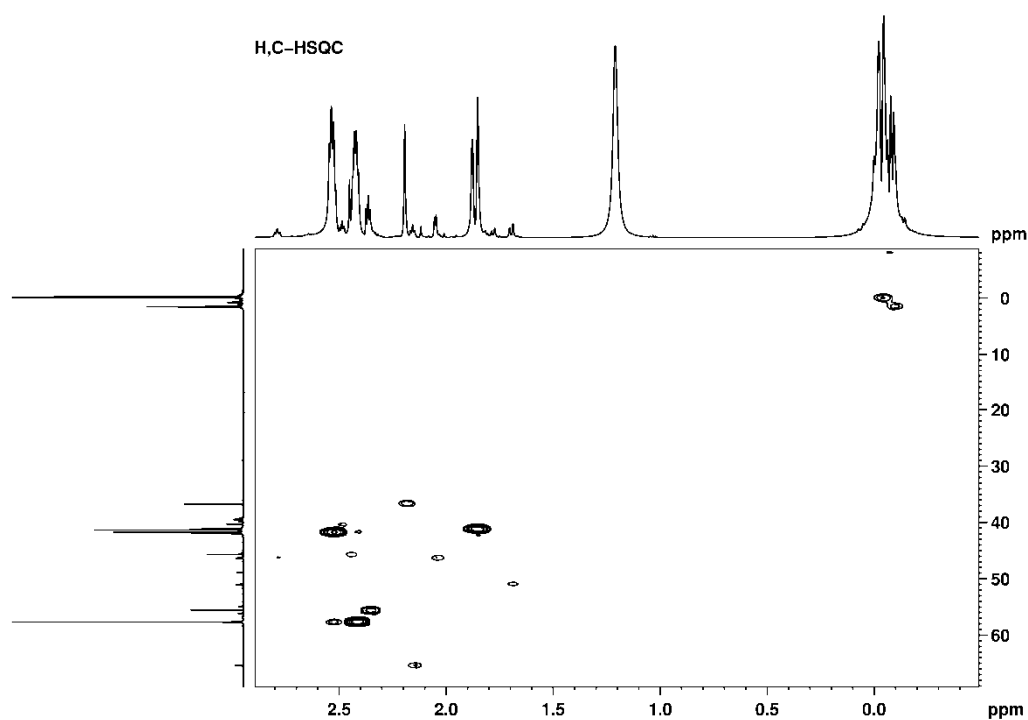

**Figure S2f.** H,C-HSQC spectrum corresponding to degraded AEAMDS, recorded neat, with DMSO- $d_6$  capillary, showing the direct correlations between protons and carbon atoms.

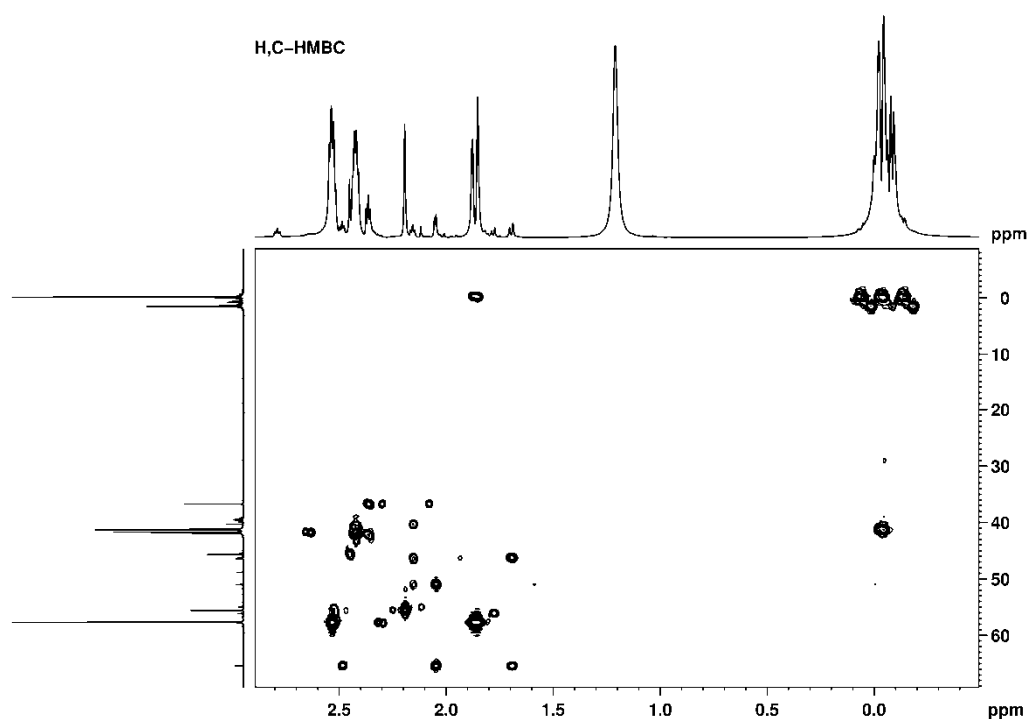

**Figure S2g.** H,C-HMBC spectrum corresponding to degraded AEAMDS, recorded neat, with DMSO- $d_6$  capillary, showing the long-range correlations between protons and carbon atoms (2 to 4 bonds apart).

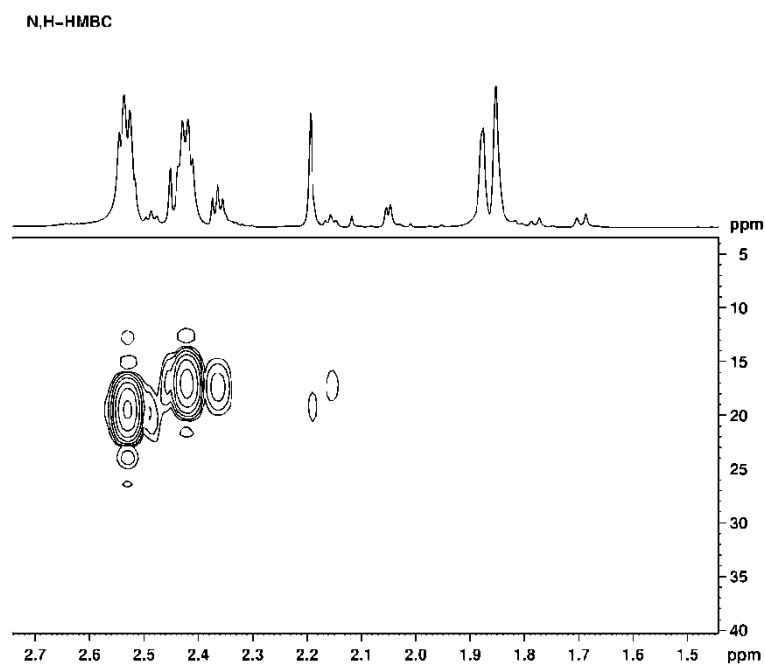

**Figure S2h.** H,N-HMBC spectrum corresponding to degraded AEAMDS, recorded neat, with DMSO- $d_6$  capillary, showing the long-range correlations between protons and nitrogen atoms (3 bonds apart).  $NH_2$  resonates at 17.4 ppm, while NH at 19.6 ppm.

### S3. HOMO-LUMO spatial distributions

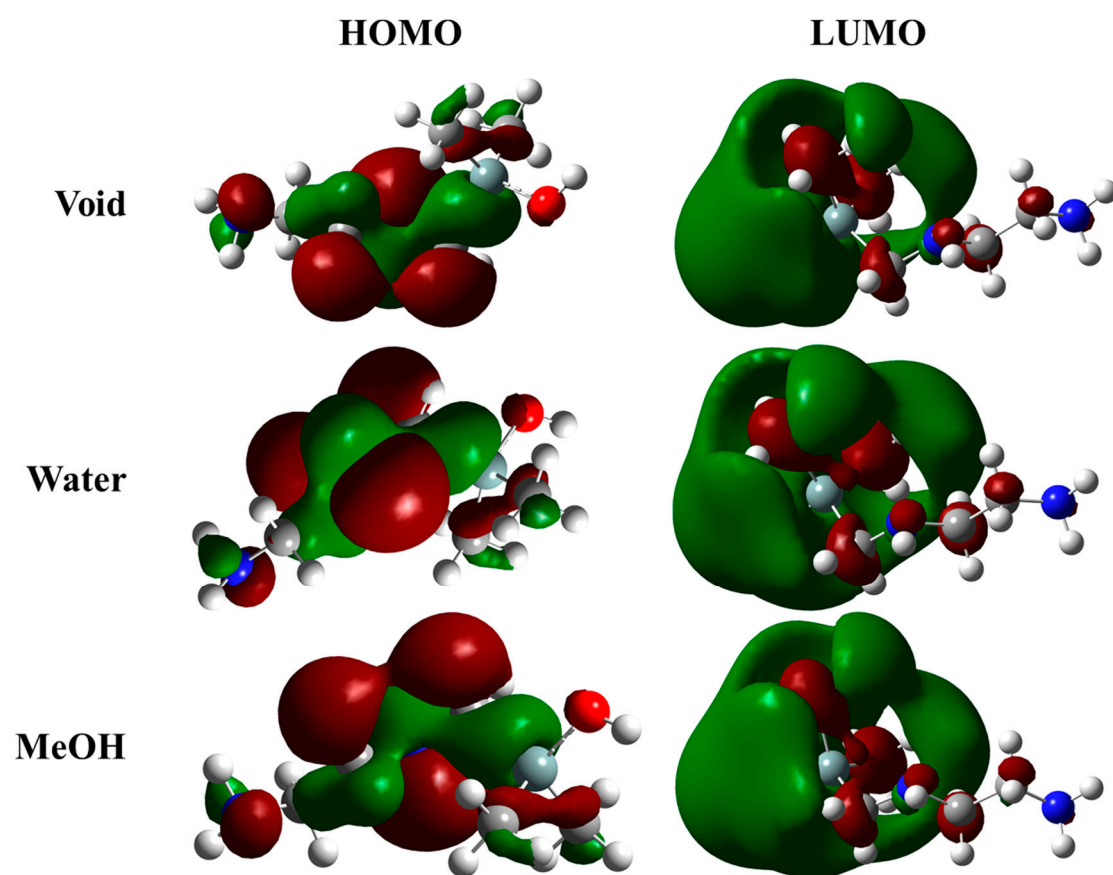

**Figure S3.** HOMO and LUMO images for silanol molecule

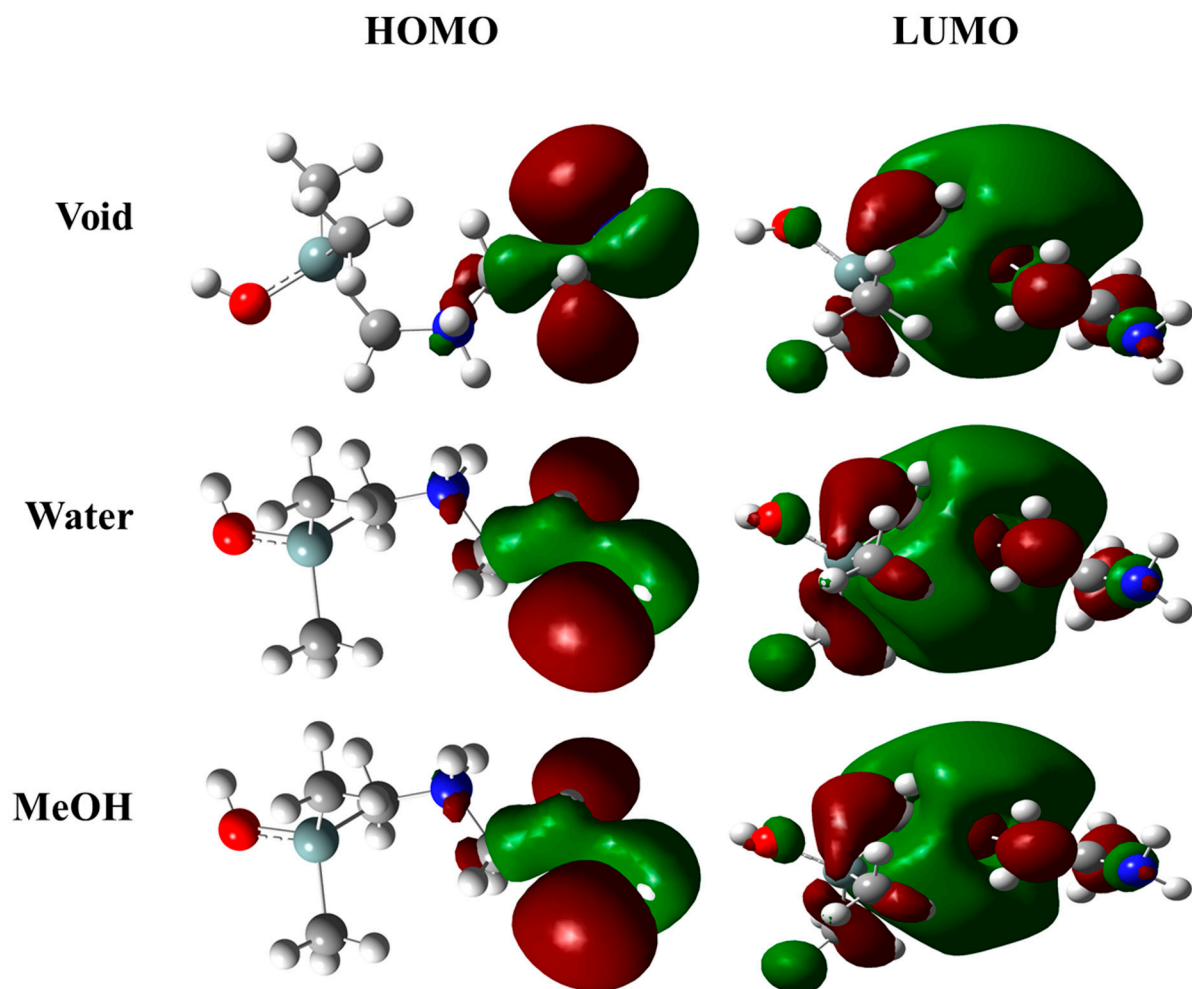

**Figure S4.** HOMO and LUMO images for H-Silanol molecule

## S4. X-ray crystallography

**Table S1.** Bond distances (Å), angles (°) and hydrogen bonds for **a3**

|          |           |        |           |
|----------|-----------|--------|-----------|
| Cu1-Cu11 | 0.000(4)  | C1-C21 | 1.393(16) |
| Cu1-Cl1  | 2.295(4)  | C1-C61 | 1.416(15) |
| Cu1-Cl11 | 2.295(4)  | C1-C6  | 1.416(15) |
| Cu1-N21  | 2.054(10) | C2-C31 | 1.345(18) |
| Cu1-N2   | 2.054(10) | C2-C3  | 1.40(2)   |
| O1-C1    | 1.311(13) | C3-C4  | 1.35(2)   |
| N1-C7    | 1.296(16) | C4-C51 | 1.679(19) |
| N1-C8    | 1.479(16) | C4-C5  | 1.348(19) |
| N2-C9    | 1.500(15) | C5-C6  | 1.394(17) |
| N2-C10   | 1.384(14) | C6-C7  | 1.440(18) |
| N2-C101  | 1.384(14) | C8-C9  | 1.529(19) |
| C1-C2    | 1.393(16) | C8-C91 | 1.529(19) |

|                           |       |                        |           |
|---------------------------|-------|------------------------|-----------|
| Cu1 <sup>1</sup> -Cu1-Cl1 | 0(10) | C3 <sup>1</sup> -C2-C1 | 124.6(13) |
|---------------------------|-------|------------------------|-----------|

|                                       |           |                                     |           |
|---------------------------------------|-----------|-------------------------------------|-----------|
| Cu1 <sup>1</sup> -Cu1-N2              | 0(10)     | C3 <sup>1</sup> -C2-C3              | 21(4)     |
| Cl1-Cu1-Cl1 <sup>1</sup>              | 20.2(3)   | C2 <sup>1</sup> -C3-C2              | 12(3)     |
| N2-Cu1-Cl1                            | 92.0(3)   | C2 <sup>1</sup> -C3-C4              | 119.2(13) |
| N21-Cu1-Cl1 <sup>1</sup>              | 92.0(3)   | C4-C3-C2                            | 120.6(13) |
| N2-Cu1-Cl1 <sup>1</sup>               | 96.5(3)   | C3-C4-C3 <sup>1</sup>               | 19(3)     |
| N21-Cu1-Cl1                           | 96.5(3)   | C3-C4-C5 <sup>1</sup>               | 106.3(17) |
| N21-Cu1-N2                            | 25.4(6)   | C3-C4-C5                            | 119.2(12) |
| Cu1 <sup>1</sup> -Cl1-Cu1             | 0.00(6)   | C3 <sup>1</sup> -C4-C5 <sup>1</sup> | 92.8(15)  |
| C7-N1-C8                              | 118.5(12) | C5-C4-C3 <sup>1</sup>               | 115.4(13) |
| C9-N2-Cu11                            | 102.7(7)  | C5-C4-C5 <sup>1</sup>               | 36.2(12)  |
| C10 <sup>1</sup> -N2-Cu1 <sup>1</sup> | 121.1(9)  | C4-C5-C6                            | 122.4(13) |
| C10-N2-Cu1                            | 121.1(9)  | C1-C6-C5 <sup>1</sup>               | 105.9(10) |
| C10-N2-Cu1 <sup>1</sup>               | 121.1(9)  | C1-C6-C7                            | 124.1(11) |
| C10 <sup>1</sup> -N2-Cu1              | 121.1(9)  | C5-C6-C1                            | 118.9(12) |
| C10-N2-C9                             | 112.7(10) | C5-C6-C5 <sup>1</sup>               | 37.6(12)  |
| C10 <sup>1</sup> -N2-C9               | 112.7(10) | C5-C6-C7                            | 117.1(12) |
| C10 <sup>1</sup> -N2-C10              | 0.0(11)   | C7-C6-C5 <sup>1</sup>               | 117.8(11) |
| O1 <sup>1</sup> -C1-O1                | 14.9(13)  | N1-C7-N1 <sup>1</sup>               | 31.0(9)   |
| O1 <sup>1</sup> -C1-C2 <sup>1</sup>   | 119.3(11) | N1 <sup>1</sup> -C7-C6 <sup>1</sup> | 96.2(10)  |
| O11-C1-C2                             | 121.1(10) | N1-C7-C6                            | 123.4(12) |
| O1-C1-C21                             | 121.1(10) | N1-C7-C6 <sup>1</sup>               | 116.7(12) |
| O1-C1-C2                              | 119.3(11) | C6-C7-N1 <sup>1</sup>               | 112.9(12) |
| O1-C1-C6 <sup>1</sup>                 | 119.8(9)  | C6-C7-C6 <sup>1</sup>               | 23.5(9)   |
| O1 <sup>1</sup> -C1-C6 <sup>1</sup>   | 123.9(10) | N1-C8-N1 <sup>1</sup>               | 26.0(8)   |
| O1-C1-C6                              | 123.9(10) | N1-C8-C9 <sup>1</sup>               | 106.4(13) |
| O1 <sup>1</sup> -C1-C6                | 119.8(9)  | N1-C8-C9                            | 106.4(13) |
| C2 <sup>1</sup> -C1-C2                | 12(3)     | C9-C8-N1 <sup>1</sup>               | 91.4(11)  |
| C2-C1-C6                              | 116.9(11) | C9 <sup>1</sup> -C8-N1 <sup>1</sup> | 91.4(11)  |
| C2 <sup>1</sup> -C1-C6                | 113.6(10) | C9 <sup>1</sup> -C8-C9              | 0.0(9)    |
| C2-C1-C6 <sup>1</sup>                 | 113.6(10) | N2-C9-N2 <sup>1</sup>               | 35.0(9)   |
| C2 <sup>1</sup> -C1-C6 <sup>1</sup>   | 116.9(11) | N2-C9-C8                            | 105.6(9)  |
| C6 <sup>1</sup> -C1-C6                | 27.1(10)  | N2 <sup>1</sup> -C9-C8              | 123.0(10) |
| C1-C2-C3                              | 120.4(16) | N2 <sup>1</sup> -C10-N2             | 38.1(10)  |

<sup>1</sup> + *x*,  $\frac{1}{2}$  - *y*, + *z*

| D-H...A                 | d(D-H)/Å | d(H...A)/Å | d(D...A)/Å | D-H...A/° | Symmetry code                                            |
|-------------------------|----------|------------|------------|-----------|----------------------------------------------------------|
| N2-H...Cl1 <sup>1</sup> | 0.96     | 2.1        | 2.802(12)  | 128.9     | 1 - <i>x</i> , - <i>y</i> , 1 - <i>z</i>                 |
| N2-H...Cl1 <sup>2</sup> | 0.96     | 2.71       | 3.509(12)  | 141.6     | 1 - <i>x</i> , - $\frac{1}{2}$ + <i>y</i> , 1 - <i>z</i> |
| N2-H...O1 <sup>2</sup>  | 0.96     | 2.47       | 3.233(18)  | 136.6     | 1 - <i>x</i> , - $\frac{1}{2}$ + <i>y</i> , 1 - <i>z</i> |
| C10-H...O1 <sup>3</sup> | 0.95     | 2.34       | 3.227(16)  | 154.2     | 1 - <i>x</i> , 1 - <i>y</i> , 1 - <i>z</i>               |
| C10-H...O1 <sup>4</sup> | 0.95     | 2.65       | 3.550(16)  | 157.5     | 1 - <i>x</i> , $\frac{1}{2}$ + <i>y</i> , 1 - <i>z</i>   |
| C10-H...Cl1             | 0.98     | 2.77       | 3.284(14)  | 113.2     | -                                                        |

Single crystal X-ray diffraction has revealed that compound **a3** has a molecular crystal structure. Its asymmetric unit comprises one complex molecule [CuHL]. Cu<sup>2+</sup> atom exhibited slightly distorted N<sub>2</sub>OCl square planes coordination provided by HL unit, which plays the

role of three-dentate ligand. The central atom Cu<sup>2+</sup> is displaced from the mean plane of coordination atom at 0.266(6) Å.

**Table S2.** Bond distances (Å), angles (°) and hydrogen bonds for **a4**

|                     |           |                      |           |
|---------------------|-----------|----------------------|-----------|
| Cu1-O1              | 1.932(7)  | C1-C6                | 1.404(4)  |
| Cu1-O2 <sup>1</sup> | 2.424(7)  | C2-C3                | 1.404(4)  |
| Cu1-O2              | 1.966(7)  | C3-C4                | 1.404(4)  |
| Cu1-N1              | 1.962(8)  | C4-C5                | 1.404(4)  |
| Cu1-N2              | 2.024(9)  | C4-C11               | 1.453(10) |
| O1-C1               | 1.330(11) | C5-C6                | 1.404(4)  |
| O2-C12              | 1.286(12) | C6-C7                | 1.452(10) |
| O3-C12              | 1.247(13) | C8-C9                | 1.532(15) |
| N1-C7               | 1.277(12) | C12-C13              | 1.497(15) |
| N1-C8               | 1.472(9)  | N3-C14               | 1.301(14) |
| N2-C9               | 1.472(9)  | N3-C15               | 1.300(14) |
| N2-C10              | 1.470(13) | C14-C14 <sup>2</sup> | 1.47(2)   |
| C1-C2               | 1.404(4)  | C15-C15 <sup>2</sup> | 1.46(2)   |

|                         |          |                         |           |
|-------------------------|----------|-------------------------|-----------|
| O1-Cu1-O2               | 90.2(3)  | O1-C1-C6                | 124.6(7)  |
| O1-Cu1-O2 <sup>1</sup>  | 99.4(3)  | C2-C1-C6                | 117.9(8)  |
| O1-Cu1-N1               | 92.1(3)  | C3-C2-C1                | 120.2(9)  |
| O1-Cu1-N2               | 173.5(3) | C2-C3-C4                | 123.5(9)  |
| O2-Cu1-O2 <sup>1</sup>  | 76.2(3)  | C3-C4-C11               | 122.1(9)  |
| O2-Cu1-N2               | 93.6(3)  | C5-C4-C3                | 114.4(9)  |
| N1-Cu1-O2               | 177.3(3) | C5-C4-C11               | 123.5(10) |
| N1-Cu1-O2 <sup>1</sup>  | 104.8(3) | C6-C5-C4                | 123.8(9)  |
| N1-Cu1-N2               | 84.0(3)  | C1-C6-C7                | 123.1(7)  |
| N2-Cu1-O2 <sup>1</sup>  | 86.7(3)  | C5-C6-C1                | 119.9(8)  |
| C1-O1-Cu1               | 127.4(5) | C5-C6-C7                | 117.0(7)  |
| Cu1-O2-Cu1 <sup>1</sup> | 103.8(3) | N1-C7-C6                | 125.2(8)  |
| C12-O2-Cu1 <sup>1</sup> | 142.5(7) | N1-C8-C9                | 107.0(7)  |
| C12-O2-Cu1              | 113.6(6) | N2-C9-C8                | 105.9(8)  |
| C7-N1-Cu1               | 127.3(6) | O2-C12-C13              | 118.0(10) |
| C7-N1-C8                | 120.7(8) | O3-C12-O2               | 122.2(10) |
| C8-N1-Cu1               | 111.9(6) | O3-C12-C13              | 119.7(10) |
| C9-N2-Cu1               | 107.6(6) | C15-N3-C14              | 102.5(17) |
| C10-N2-Cu1              | 120.2(7) | N3-C14-C14 <sup>2</sup> | 119.8(13) |
| C10-N2-C9               | 111.1(9) | N3-C15-C15 <sup>2</sup> | 114.9(15) |
| O1-C1-C2                | 117.4(7) |                         |           |

<sup>1</sup>1 - x, 2 - y, 1 - z; <sup>2</sup>1 - x, + y, ½ - z

| D-H...A                              | d(D-H)/Å | d(H...A)/Å | d(D-A)/Å  | D-H...A/° | Symmetry code     |
|--------------------------------------|----------|------------|-----------|-----------|-------------------|
| N2-H...O1 <sub>w</sub>               | 1        | 1.95       | 2.900(12) | 158.2     | -                 |
| C8-H...O3 <sup>1</sup>               | 0.99     | 2.56       | 3.249(11) | 126.7     | ½ - x, ½ + y, + z |
| O1 <sub>w</sub> -H...O3 <sup>2</sup> | 0.85     | 1.95       | 2.757(11) | 157.3     | + x, 1 + y, + z   |

|                             |      |      |           |       |                             |
|-----------------------------|------|------|-----------|-------|-----------------------------|
| O1 $w$ -H...O1 <sup>3</sup> | 0.85 | 2.09 | 2.822(10) | 143.6 | 1 - $x$ , 2 - $y$ , 1 - $z$ |
|-----------------------------|------|------|-----------|-------|-----------------------------|

The asymmetric unit of the crystals **a4** and **a5** is build up from similar dinuclear neutral complexes [Cu<sub>2</sub>(HL<sub>1</sub>)<sub>2</sub>Ac<sub>2</sub>] and [Cu<sub>2</sub>(HL<sub>2</sub>)<sub>2</sub>Ac<sub>2</sub>], respectively and interstitial water molecules in 1:1 ratio. In the centro-symetric dinuclear units, Cu(II) atoms are bridged by two  $\mu$ -oxo oxygen atoms of two acetate anions at 3.465(2) Å, 3.4236(7) Å separations for **a4** and **a5**, respectively. The coordination of each copper atom is completed by N<sub>2</sub>O coordination set provided by HL<sub>1</sub><sup>-</sup> and HL<sub>2</sub><sup>-</sup> (for **a4** and **a5**, respectively) three-deentate anion ligands. It is to be mentioned, that the molecular structure is stabilized by hydrogen bonding involving co-crystalized water molecule (see **Figure 1 a4, a5**).

**Table S3.** Bond distances (Å), angles (°) and hydrogen bonds for **a5**

|                     |            |         |          |
|---------------------|------------|---------|----------|
| Cu1-O1              | 1.929(2)   | N2-C9   | 1.483(4) |
| Cu1-O3              | 1.9676(17) | N2-C10  | 1.468(4) |
| Cu1-O3 <sup>1</sup> | 2.4001(19) | C1-C2   | 1.424(4) |
| Cu1-N1              | 1.950(2)   | C1-C6   | 1.419(4) |
| Cu1-N2              | 2.046(2)   | C2-C3   | 1.369(5) |
| O1-C1               | 1.303(3)   | C3-C4   | 1.385(5) |
| O2-C2               | 1.371(4)   | C4-C5   | 1.357(5) |
| O2-C11              | 1.423(4)   | C5-C6   | 1.410(4) |
| O3-C12              | 1.276(3)   | C6-C7   | 1.430(4) |
| O4-C12              | 1.230(3)   | C8-C9   | 1.499(4) |
| N1-C7               | 1.286(4)   | C12-C13 | 1.516(4) |
| N1-C8               | 1.471(4)   |         |          |

|                         |            |            |          |
|-------------------------|------------|------------|----------|
| O1-Cu1-O3 <sup>1</sup>  | 94.88(8)   | C10-N2-C9  | 111.6(2) |
| O1-Cu1-O3               | 90.95(8)   | O1-C1-C2   | 118.6(3) |
| O1-Cu1-N1               | 92.25(9)   | O1-C1-C6   | 125.1(3) |
| O1-Cu1-N2               | 173.39(9)  | C6-C1-C2   | 116.3(3) |
| O3-Cu1-O3 <sup>1</sup>  | 77.22(8)   | O2-C2-C1   | 113.0(3) |
| O3-Cu1-N2               | 93.59(9)   | C3-C2-O2   | 125.2(3) |
| N1-Cu1-O3 <sup>1</sup>  | 105.86(9)  | C3-C2-C1   | 121.8(3) |
| N1-Cu1-O3               | 175.34(9)  | C2-C3-C4   | 120.7(4) |
| N1-Cu1-N2               | 82.95(10)  | C5-C4-C3   | 119.8(3) |
| N2-Cu1-O3 <sup>1</sup>  | 90.82(9)   | C4-C5-C6   | 121.3(4) |
| C1-O1-Cu1               | 127.55(19) | C1-C6-C7   | 122.3(3) |
| C2-O2-C11               | 118.5(3)   | C5-C6-C1   | 120.1(3) |
| Cu1-O3-Cu1 <sup>1</sup> | 102.78(8)  | C5-C6-C7   | 117.5(3) |
| C12-O3-Cu1              | 115.29(18) | N1-C7-C6   | 125.9(3) |
| C12-O3-Cu1 <sup>1</sup> | 141.89(18) | N1-C8-C9   | 107.1(3) |
| C7-N1-Cu1               | 126.8(2)   | N2-C9-C8   | 106.9(3) |
| C7-N1-C8                | 119.3(3)   | O3-C12-C13 | 115.9(3) |
| C8-N1-Cu1               | 113.91(19) | O4-C12-O3  | 123.8(3) |
| C9-N2-Cu1               | 106.08(18) | O4-C12-C13 | 120.2(3) |



|            |          |  |  |
|------------|----------|--|--|
| C10-N2-Cu1 | 120.9(2) |  |  |
|------------|----------|--|--|

$$^11 - x, 1 - y, 1 - z$$

| D-H...A                             | d(D-H)/Å | d(H...A)/Å | d(D-A)/Å | D-H...A/° | Symmetry code                             |
|-------------------------------------|----------|------------|----------|-----------|-------------------------------------------|
| N2-H...O1 <sub>w</sub> <sup>1</sup> | 0.98     | 1.93       | 2.902(4) | 171.4     | 1 - x, 1 - y, 1 - z                       |
| C7-H...O4 <sup>2</sup>              | 0.93     | 2.5        | 3.390(4) | 159.5     | $\frac{1}{2} + x, \frac{3}{2} - y, 1 - z$ |

**Table S4.** Bond distances (Å), angles (°) and hydrogen bonds for **a6**

|         |          |         |          |
|---------|----------|---------|----------|
| Cu1-O1  | 1.934(2) | C1-C6   | 1.426(4) |
| Cu1-O2  | 1.916(2) | C2-C3   | 1.363(5) |
| Cu1-O3  | 2.395(3) | C3-C4   | 1.394(5) |
| Cu1-N1  | 1.946(3) | C4-C5   | 1.362(5) |
| Cu1-N2  | 1.956(3) | C5-C6   | 1.399(5) |
| Cl1-C4  | 1.750(4) | C6-C7   | 1.447(4) |
| Cl2-C13 | 1.745(4) | C8-C9   | 1.442(5) |
| O1-C1   | 1.307(4) | C10-C11 | 1.438(5) |
| O2-C16  | 1.298(4) | C11-C12 | 1.400(5) |
| O3-C17  | 1.383(5) | C11-C16 | 1.425(4) |
| N1-C7   | 1.268(4) | C12-C13 | 1.353(5) |
| N1-C8   | 1.467(4) | C13-C14 | 1.399(5) |
| N2-C9   | 1.461(4) | C14-C15 | 1.363(5) |
| N2-C10  | 1.272(4) | C15-C16 | 1.416(5) |
| C1-C2   | 1.415(4) |         |          |

|            |            |             |          |
|------------|------------|-------------|----------|
| O1-Cu1-O3  | 98.07(10)  | C3-C4-Cl1   | 120.4(3) |
| O1-Cu1-N1  | 92.68(10)  | C5-C4-Cl1   | 119.5(3) |
| O1-Cu1-N2  | 168.58(11) | C5-C4-C3    | 120.0(3) |
| O2-Cu1-O1  | 89.81(9)   | C4-C5-C6    | 121.1(3) |
| O2-Cu1-O3  | 91.36(10)  | C1-C6-C7    | 122.6(3) |
| O2-Cu1-N1  | 174.44(10) | C5-C6-C1    | 120.2(3) |
| O2-Cu1-N2  | 93.02(10)  | C5-C6-C7    | 117.2(3) |
| N1-Cu1-O3  | 93.22(11)  | N1-C7-C6    | 125.7(3) |
| N1-Cu1-N2  | 83.59(11)  | C9-C8-N1    | 110.6(3) |
| N2-Cu1-O3  | 92.93(11)  | C8-C9-N2    | 111.6(3) |
| C1-O1-Cu1  | 127.2(2)   | N2-C10-C11  | 126.1(3) |
| C16-O2-Cu1 | 127.4(2)   | C12-C11-C10 | 117.6(3) |
| C17-O3-Cu1 | 128.0(3)   | C12-C11-C16 | 119.7(3) |
| C7-N1-Cu1  | 126.9(2)   | C16-C11-C10 | 122.7(3) |
| C7-N1-C8   | 119.6(3)   | C13-C12-C11 | 122.0(3) |
| C8-N1-Cu1  | 113.2(2)   | C12-C13-Cl2 | 120.9(3) |
| C9-N2-Cu1  | 113.1(2)   | C12-C13-C14 | 119.8(3) |
| C10-N2-Cu1 | 125.7(2)   | C14-C13-Cl2 | 119.2(3) |
| C10-N2-C9  | 121.1(3)   | C15-C14-C13 | 119.3(3) |
| O1-C1-C2   | 119.4(3)   | C14-C15-C16 | 123.2(3) |
| O1-C1-C6   | 124.5(3)   | O2-C16-C11  | 124.5(3) |

|          |          |             |          |
|----------|----------|-------------|----------|
| C2-C1-C6 | 116.1(3) | O2-C16-C15  | 119.6(3) |
| C3-C2-C1 | 122.6(3) | C15-C16-C11 | 116.0(3) |
| C2-C3-C4 | 119.8(3) |             |          |

| D-H...A                 | d(D-H)/Å | d(H...A)/Å | d(D-A)/Å | D-H...A/° | Symmetry code       |
|-------------------------|----------|------------|----------|-----------|---------------------|
| O3-H...O1 <sup>1</sup>  | 0.861(9) | 1.928(12)  | 2.783(3) | 172(3)    | 1 - x, 1 - y, 1 - z |
| C8-H...Cl1 <sup>2</sup> | 0.97     | 2.95       | 3.842(5) | 153.7     | + x, 1 + y, + z     |
| C8-H...Cl2 <sup>3</sup> | 0.97     | 2.94       | 3.626(5) | 128.7     | + x, + y, - 1 + z   |
| C9-H...O2 <sup>4</sup>  | 0.97     | 2.63       | 3.400(5) | 136.4     | 2 - x, 1 - y, 1 - z |

In molecular complex **a6** [CuL<sub>3</sub>MeOH] the Cu(II) is five-coordinated, in distorted square-pyramidal coordination formed by tetradentate Schiff base ligand at the base and MeOH in apical coordination. Cu(II) atom is displaced from the mean plane N<sub>2</sub>O<sub>2</sub> atoms at 0.1401(13) Å to towards oxygen atom of coordinated MeOH.

**Table S5.** Bond distances (Å), angles (°) and hydrogen bonds for **b2**

|                     |           |         |           |
|---------------------|-----------|---------|-----------|
| Fe1-O1              | 1.946(5)  | C2-C3   | 1.368(10) |
| Fe1-O1 <sub>w</sub> | 2.031(5)  | C2-C7   | 1.414(10) |
| Fe1-O2 <sub>w</sub> | 2.068(5)  | C3-C4   | 1.429(10) |
| Fe1-O3              | 1.981(5)  | C4-C5   | 1.385(12) |
| Fe1-O4              | 1.960(5)  | C4-C8   | 1.384(11) |
| Fe1-O6              | 1.963(5)  | C5-C6   | 1.369(13) |
| O1-C1               | 1.286(8)  | C6-C7   | 1.380(11) |
| O2-C1               | 1.248(8)  | C9-C10  | 1.509(13) |
| O3-C3               | 1.324(8)  | C11-C12 | 1.487(15) |
| O4-C18              | 1.276(10) | C12-C13 | 1.386(14) |
| O5-C18              | 1.235(10) | C12-C17 | 1.422(11) |
| O6-C17              | 1.303(10) | C13-C14 | 1.337(15) |
| N1-C8               | 1.323(11) | C14-C15 | 1.359(14) |
| N1-C9               | 1.461(11) | C15-C16 | 1.395(12) |
| N2-C10              | 1.450(12) | C16-C17 | 1.400(12) |
| N2-C11              | 1.267(12) | C16-C18 | 1.485(12) |
| C1-C2               | 1.484(10) |         |           |

|                                      |          |           |          |
|--------------------------------------|----------|-----------|----------|
| O1-Fe1-O1 <sub>w</sub>               | 92.5(2)  | O3-C3-C4  | 115.9(7) |
| O1-Fe1-O2 <sub>w</sub>               | 87.0(2)  | C2-C3-C4  | 122.4(7) |
| O1-Fe1-O3                            | 86.4(2)  | C5-C4-C3  | 117.3(8) |
| O1-Fe1-O4                            | 98.9(2)  | C8-C4-C3  | 124.5(8) |
| O1-Fe1-O6                            | 170.6(2) | C8-C4-C5  | 118.2(8) |
| O1 <sub>w</sub> -Fe1-O2 <sub>w</sub> | 176.7(2) | C6-C5-C4  | 122.2(8) |
| O3-Fe1-O1 <sub>w</sub>               | 85.0(2)  | C5-C6-C7  | 118.9(8) |
| O3-Fe1-O2 <sub>w</sub>               | 91.7(2)  | C6-C7-C2  | 122.4(8) |
| O4-Fe1-O1 <sub>w</sub>               | 90.2(2)  | N1-C8-C4  | 123.5(8) |
| O4-Fe1-O2 <sub>w</sub>               | 93.1(2)  | N1-C9-C10 | 109.2(8) |

|                        |          |             |           |
|------------------------|----------|-------------|-----------|
| O4-Fe1-O3              | 173.0(2) | N2-C10-C9   | 110.1(8)  |
| O4-Fe1-O6              | 88.6(2)  | N2-C11-C12  | 125.0(8)  |
| O6-Fe1-O1 <sub>w</sub> | 93.2(2)  | C13-C12-C11 | 121.1(10) |
| O6-Fe1-O2 <sub>w</sub> | 87.0(2)  | C13-C12-C17 | 119.6(11) |
| O6-Fe1-O3              | 86.6(2)  | C17-C12-C11 | 119.1(8)  |
| C1-O1-Fe1              | 130.4(5) | C14-C13-C12 | 121.6(11) |
| C3-O3-Fe1              | 125.8(4) | C13-C14-C15 | 119.4(10) |
| C18-O4-Fe1             | 131.1(5) | C14-C15-C16 | 123.0(10) |
| C17-O6-Fe1             | 126.9(5) | C15-C16-C17 | 117.8(9)  |
| C8-N1-C9               | 126.0(8) | C15-C16-C18 | 118.2(9)  |
| C11-N2-C10             | 123.7(8) | C17-C16-C18 | 124.0(8)  |
| O1-C1-C2               | 119.1(6) | O6-C17-C12  | 118.0(8)  |
| O2-C1-O1               | 119.3(6) | O6-C17-C16  | 123.5(7)  |
| O2-C1-C2               | 121.5(7) | C16-C17-C12 | 118.5(9)  |
| C3-C2-C1               | 125.0(6) | O4-C18-C16  | 120.1(8)  |
| C3-C2-C7               | 116.8(7) | O5-C18-O4   | 121.5(8)  |
| C7-C2-C1               | 117.8(6) | O5-C18-C16  | 118.4(8)  |
| O3-C3-C2               | 121.7(6) |             |           |

| D-H...A                              | d(D-H)/Å | d(H...A)/Å | d(D...A)/Å | D-H...A/° | Symmetry code               |
|--------------------------------------|----------|------------|------------|-----------|-----------------------------|
| O1 <sub>w</sub> -H...O5 <sup>1</sup> | 0.85     | 1.78       | 2.581(8)   | 154.7     | + x, + y, - z               |
| O1 <sub>w</sub> -H...O3 <sub>w</sub> | 0.85     | 1.91       | 2.733(10)  | 162.8     | —                           |
| O2 <sub>w</sub> -H...O2 <sup>2</sup> | 0.85     | 1.78       | 2.626(7)   | 176.9     | - 1/2 + x, 3/2 - y, 1/4 + z |
| O3-H...N1                            | 0.88     | 1.81       | 2.583(8)   | 146.3     | —                           |
| O3 <sub>w</sub> -H...N1              | 0.86     | 2.43       | 3.177(12)  | 145.5     | —                           |
| O6-H...N2                            | 0.87     | 1.7        | 2.564(9)   | 172.3     | —                           |
| C8-H...O1 <sub>w</sub> <sup>2</sup>  | 0.93     | 2.57       | 3.347(10)  | 141.7     | - 1/2 + x, 3/2 - y, 1/4 + z |
| C10-H...O1 <sup>3</sup>              | 0.97     | 2.6        | 3.470(10)  | 148.9     | 3/2 - x, -1/2 + y, 1/4 - z  |
| C10-H...O1 <sup>2</sup>              | 0.97     | 2.63       | 3.503(11)  | 149.8     | - 1/2 + x, 3/2 - y, 1/4 + z |
| C11-H...O2 <sup>3</sup>              | 0.93     | 2.42       | 3.138(11)  | 133.8     | 3/2 - x, -1/2 + y, 1/4 - z  |

Single crystal X-ray analysis has revealed that compound **b2** has a molecular crystal structure. Its asymmetric unit comprises one complex molecule [FeH<sub>2</sub>L<sub>4</sub>(2H<sub>2</sub>O)] and interstitial water molecules in 1:1 ratio. Fe<sup>2+</sup> has a squared-pyramidal geometry, the base of the pyramid consists of four oxygen atoms, and two water molecules are coordinated in the apical position, H<sub>2</sub>L<sub>4</sub><sup>2-</sup> unit has the role of tetra-dentate ligand. The asymmetric unit is stabilized by intra-molecular hydrogen bonds O-H...N.

**Table S6.** Bond distances (Å), angles (°) and hydrogen bonds for **b3**

|                     |          |       |          |
|---------------------|----------|-------|----------|
| Ni1-O1 <sup>1</sup> | 1.865(4) | C1-C2 | 1.410(8) |
| Ni1-O1              | 1.865(4) | C1-C6 | 1.419(9) |
| Ni1-N1              | 1.841(6) | C2-C3 | 1.393(7) |
| Ni1-N1 <sup>1</sup> | 1.841(6) | C2-C9 | 1.490(9) |

|       |          |                    |           |
|-------|----------|--------------------|-----------|
| O1-C1 | 1.321(9) | C3-C4              | 1.372(9)  |
| O2-C9 | 1.349(8) | C4-C5              | 1.360(9)  |
| O3-C9 | 1.207(8) | C5-C6              | 1.409(7)  |
| N1-C7 | 1.312(9) | C6-C7              | 1.419(10) |
| N1-C8 | 1.469(8) | C8-C8 <sup>1</sup> | 1.445(12) |

|                                      |          |           |          |
|--------------------------------------|----------|-----------|----------|
| O1-Ni1-O1 <sup>1</sup>               | 86.6(3)  | C3-C2-C1  | 120.6(7) |
| N1-Ni1-O1                            | 94.1(2)  | C3-C2-C9  | 116.7(7) |
| N1 <sup>1</sup> -Ni1-O1 <sup>1</sup> | 94.1(2)  | C4-C3-C2  | 121.4(7) |
| N1 <sup>1</sup> -Ni1-O1              | 177.4(3) | C5-C4-C3  | 119.6(6) |
| N1-Ni1-O1 <sup>1</sup>               | 177.4(3) | C4-C5-C6  | 121.2(7) |
| N1 <sup>1</sup> -Ni1-N1              | 85.3(4)  | C5-C6-C1  | 120.0(7) |
| C1-O1-Ni1                            | 128.2(4) | C5-C6-C7  | 118.3(8) |
| C7-N1-Ni1                            | 126.9(5) | C7-C6-C1  | 121.6(6) |
| C7-N1-C8                             | 119.5(6) | N1-C7-C6  | 125.6(7) |
| C8-N1-Ni1                            | 113.6(5) | C81-C8-N1 | 107.5(5) |
| O1-C1-C2                             | 119.7(6) | O2-C9-C2  | 116.1(6) |
| O1-C1-C6                             | 123.0(6) | O3-C9-O2  | 119.4(7) |
| C2-C1-C6                             | 117.2(7) | O3-C9-C2  | 124.4(7) |
| C1-C2-C9                             | 122.8(5) |           |          |

$$^1 \frac{1}{2} - x, + y, 1 - z$$

| D-H...A                | d(D-H)/Å | d(H...A)/Å | d(D-A)/Å | D-H...A/° | Symmetry code     |
|------------------------|----------|------------|----------|-----------|-------------------|
| O2-H...O1              | 0.82     | 1.76       | 2.512(5) | 152       | -                 |
| C8-H...O2 <sup>1</sup> | 0.97     | 2.51       | 3.295(7) | 137.7     | + x, - 1 + y, + z |

In molecular complex **b3** [NiH<sub>2</sub>L<sub>5</sub>] the Ni(II) is four-coordinated, Ni<sup>2+</sup> atom exhibited slightly distorted N<sub>2</sub>O<sub>2</sub> square planes coordination provided by H<sub>2</sub>L<sub>5</sub><sup>2-</sup> unit, which plays the role of tetra-dentate ligand.

**Table S7.** Bond distances (Å), angles (°) and hydrogen bonds for **b4**

|         |           |        |            |
|---------|-----------|--------|------------|
| Pt1-Cl1 | 2.320(4)  | N2-C10 | 1.466(4)   |
| Pt1-O3  | 2.015(10) | C1-C2  | 1.3978(18) |
| Pt1-N1  | 1.954(6)  | C1-C6  | 1.3978(18) |
| Pt1-N2  | 2.060(6)  | C2-C3  | 1.3978(18) |
| O1-C11  | 1.313(15) | C2-C11 | 1.467(5)   |
| O2-C11  | 1.191(16) | C3-C4  | 1.3978(18) |
| O3-C1   | 1.310(10) | C4-C5  | 1.3978(18) |
| N1-C7   | 1.277(8)  | C5-C6  | 1.3978(18) |
| N1-C8   | 1.466(4)  | C6-C7  | 1.467(5)   |
| N2-C9   | 1.466(4)  | C8-C9  | 1.504(13)  |

|            |         |           |          |
|------------|---------|-----------|----------|
| O3-Pt1-Cl1 | 87.6(3) | C1-C2-C11 | 124.3(6) |
|------------|---------|-----------|----------|

|            |           |           |           |
|------------|-----------|-----------|-----------|
| O3-Pt1-N2  | 176.5(3)  | C3-C2-C1  | 119.9(3)  |
| N1-Pt1-Cl1 | 178.7(3)  | C3-C2-C11 | 115.7(6)  |
| N1-Pt1-O3  | 92.6(3)   | C4-C3-C2  | 122.4(3)  |
| N1-Pt1-N2  | 84.32(19) | C5-C4-C3  | 115.8(4)  |
| N2-Pt1-Cl1 | 95.6(2)   | C4-C5-C6  | 123.1(4)  |
| C1-O3-Pt1  | 125.1(6)  | C1-C6-C5  | 119.2(3)  |
| C7-N1-Pt1  | 126.5(4)  | C1-C6-C7  | 125.3(3)  |
| C7-N1-C8   | 120.3(5)  | C5-C6-C7  | 115.4(3)  |
| C8-N1-Pt1  | 113.2(4)  | N1-C7-C6  | 124.9(5)  |
| C9-N2-Pt1  | 107.4(5)  | N1-C8-C9  | 108.7(5)  |
| C10-N2-Pt1 | 118.5(5)  | N2-C9-C8  | 110.5(6)  |
| C10-N2-C9  | 108.0(8)  | O1-C11-C2 | 115.8(9)  |
| O3-C1-C2   | 116.7(4)  | O2-C11-O1 | 120.7(10) |
| O3-C1-C6   | 124.0(5)  | O2-C11-C2 | 123.4(12) |

| D-H...A                 | d(D-H)/Å | d(H...A)/Å | d(D-A)/Å  | D-H...A/° | Symmetry code                             |
|-------------------------|----------|------------|-----------|-----------|-------------------------------------------|
| O1-H...O3               | 0.82     | 1.72       | 2.465(13) | 150.5     | -                                         |
| N2-H...Cl1 <sup>1</sup> | 0.98     | 2.56       | 3.439(7)  | 149.3     | $\frac{1}{2} + x, \frac{1}{2} - y, + z$   |
| C7-H...O1 <sup>2</sup>  | 0.93     | 2.43       | 3.283(11) | 152.9     | $+ x, - 1 + y, + z$                       |
| C8-H...O1 <sup>2</sup>  | 0.97     | 2.42       | 3.275(12) | 147.3     | $+ x, - 1 + y, + z$                       |
| C8-H...Cl1 <sup>1</sup> | 0.97     | 2.96       | 3.699(9)  | 133.8     | $\frac{1}{2} + x, \frac{1}{2} - y, + z$   |
| C9-H...Cl1 <sup>3</sup> | 0.97     | 2.81       | 3.717(10) | 156.6     | $- \frac{1}{2} + x, \frac{1}{2} - y, + z$ |
| C10-H...Cl1             | 0.96     | 2.75       | 3.367(13) | 123.1     | -                                         |

Single crystal X-ray diffraction has revealed that compound **b4** has a molecular crystal structure. Its asymmetric unit comprises one complex molecule [PtH<sub>2</sub>L<sub>6</sub>Cl]. Pt<sup>2+</sup> atom exhibited slightly distorted N<sub>2</sub>OCl square planes coordination provided by H<sub>2</sub>L<sub>6</sub><sup>-</sup> unit, which plays the role of three-dentate ligand.

**Table S8.** Bond distances (Å), angles (°) and hydrogen bonds for **c2**

|        |          |                    |          |
|--------|----------|--------------------|----------|
| Cl1-C2 | 1.736(2) | C2-C3              | 1.382(4) |
| Cl2-C4 | 1.739(3) | C3-C4              | 1.380(4) |
| O1-C1  | 1.355(3) | C4-C5              | 1.377(4) |
| N1-C7  | 1.475(3) | C5-C6              | 1.385(3) |
| N1-C8  | 1.462(3) | C6-C7              | 1.507(3) |
| C1-C2  | 1.391(3) | C7-C7 <sup>1</sup> | 1.543(5) |
| C1-C6  | 1.408(3) | C8-C8 <sup>1</sup> | 1.510(6) |

|           |            |          |          |
|-----------|------------|----------|----------|
| C8-N1-C7  | 112.87(18) | C5-C4-C3 | 121.3(2) |
| O1-C1-C2  | 118.9(2)   | C4-C5-C6 | 120.7(2) |
| O1-C1-C6  | 122.4(2)   | C1-C6-C7 | 119.8(2) |
| C2-C1-C6  | 118.7(2)   | C5-C6-C1 | 119.0(2) |
| C1-C2-Cl1 | 118.4(2)   | C5-C6-C7 | 121.1(2) |

|           |            |                       |            |
|-----------|------------|-----------------------|------------|
| C3-C2-Cl1 | 119.42(19) | N1-C7-C6              | 109.34(17) |
| C3-C2-C1  | 122.1(2)   | N1-C7-C7 <sup>1</sup> | 109.91(15) |
| C4-C3-C2  | 118.1(2)   | C6-C7-C7 <sup>1</sup> | 109.86(17) |
| C3-C4-Cl2 | 119.0(2)   | N1-C8-C8 <sup>1</sup> | 108.90(19) |
| C5-C4-Cl2 | 119.7(2)   |                       |            |

$$^1 \frac{3}{2} - x, +y, 1 - z$$

| D-H...A                 | d(D-H)/Å | d(H...A)/Å | d(D-A)/Å | D-H...A/° | Symmetry code                 |
|-------------------------|----------|------------|----------|-----------|-------------------------------|
| O1-H...N1               | 0.82     | 1.9        | 2.613(3) | 145.6     | -                             |
| N1-H...Cl1 <sup>1</sup> | 0.77(3)  | 2.97(3)    | 3.616(2) | 144(3)    | $\frac{1}{2} + x, 1 - y, + z$ |
| N1-H...O1 <sup>1</sup>  | 0.77(3)  | 2.64(3)    | 3.215(3) | 133(3)    | $\frac{1}{2} + x, 1 - y, + z$ |

The results of the X-ray analysis on the synglecystal, for the compounds **c2** and **c3**, showed that the fragment containing En cyclizes, at the level of the C=C bond, with the breaking of the double bond and the formation of a protonated piperazine fragment, the positive charge being counterbalanced by the negative charge of the phenolic O atom. A hydrogen bridge, N1-H...O1, is thus formed, through which the proton can migrate between O1 and N1, forming a 6-membered ring that gives stability to the compound.

**Table S9.** Bond distances (Å), angles (°) and hydrogen bonds for **c3**

|        |          |                    |          |
|--------|----------|--------------------|----------|
| Br1-C2 | 1.895(3) | C2-C3              | 1.388(4) |
| Br2-C4 | 1.896(3) | C3-C4              | 1.383(4) |
| O1-C1  | 1.365(3) | C4-C5              | 1.377(4) |
| N1-C7  | 1.479(4) | C5-C6              | 1.396(4) |
| N1-C8  | 1.470(4) | C6-C7              | 1.508(4) |
| C1-C2  | 1.389(4) | C7-C7 <sup>1</sup> | 1.553(5) |
| C1-C6  | 1.404(4) | C8-C8 <sup>1</sup> | 1.501(6) |

|           |          |                       |            |
|-----------|----------|-----------------------|------------|
| C8-N1-C7  | 112.4(2) | C5-C4-C3              | 121.5(3)   |
| O1-C1-C2  | 119.2(3) | C4-C5-C6              | 120.5(3)   |
| O1-C1-C6  | 121.8(3) | C1-C6-C7              | 120.4(3)   |
| C2-C1-C6  | 119.0(3) | C5-C6-C1              | 119.0(3)   |
| C1-C2-Br1 | 118.4(2) | C5-C6-C7              | 120.4(3)   |
| C3-C2-Br1 | 119.5(2) | N1-C7-C6              | 109.4(2)   |
| C3-C2-C1  | 122.1(3) | N1-C7-C7 <sup>1</sup> | 109.84(18) |
| C4-C3-C2  | 117.9(3) | C6-C7-C7 <sup>1</sup> | 109.2(2)   |
| C3-C4-Br2 | 119.1(2) | N1-C8-C8 <sup>1</sup> | 108.6(2)   |
| C5-C4-Br2 | 119.4(3) |                       |            |

$$^1 \frac{1}{2} - x, +y, 1 - z$$

| D-H...A                 | d(D-H)/Å | d(H...A)/Å | d(D-A)/Å | D-H...A/° | Symmetry code                  |
|-------------------------|----------|------------|----------|-----------|--------------------------------|
| O1-H...N1               | 0.79(3)  | 1.91(3)    | 2.618(3) | 148(3)    | -                              |
| N1-H...Br1 <sup>1</sup> | 0.77(3)  | 3.02(3)    | 3.669(3) | 144(3)    | $-\frac{1}{2} + x, 1 - y, + z$ |

|                         |      |      |          |       |                                            |
|-------------------------|------|------|----------|-------|--------------------------------------------|
| C8-H...Br1 <sup>2</sup> | 0.99 | 3.1  | 3.771(3) | 126.1 | $1 - x, -\frac{1}{2} + y, \frac{3}{2} - z$ |
| C8-H...Br2 <sup>3</sup> | 0.99 | 3.05 | 3.931(3) | 149   | $+x, -1 + y, +z$                           |

## S5. Computational calculations

**Table S10.** Wiberg bond order for AEAMDS

| Vacuum      |            | Water       |            | Methanol    |            |
|-------------|------------|-------------|------------|-------------|------------|
| Bond        | bond order | Bond        | bond order | Bond        | bond order |
| 1(Si)-2(O)  | 1.12912066 | 1(Si)-2(O)  | 1.12373283 | 1(Si)-2(O)  | 1.12159698 |
| 1(Si)-15(C) | 0.95401237 | 1(Si)-15(C) | 0.95267512 | 1(Si)-15(C) | 0.95416892 |
| 1(Si)-19(C) | 0.9521031  | 1(Si)-19(C) | 0.95137094 | 1(Si)-19(C) | 0.95071275 |
| 1(Si)-22(H) | 0.0562742  | 1(Si)-22(H) | 0.05611163 | 1(Si)-22(H) | 0.05620549 |
| 1(Si)-23(C) | 0.90921598 | 1(Si)-23(C) | 0.91428017 | 1(Si)-23(C) | 0.9144618  |
| 1(Si)-24(H) | 0.05013429 | 1(Si)-24(H) | 0.05120158 | 1(Si)-24(H) | 0.05136584 |
| 1(Si)-25(H) | 0.05628438 | 1(Si)-25(H) | 0.05675983 | 1(Si)-25(H) | 0.05662647 |
| 1(Si)-28(N) | 0.07705491 | 1(Si)-28(N) | 0.07836969 | 1(Si)-28(N) | 0.07798263 |
| 2(O)-3(Si)  | 1.12911869 | 2(O)-3(Si)  | 1.12346145 | 2(O)-3(Si)  | 1.12159661 |
| 3(Si)-4(C)  | 0.95210196 | 3(Si)-4(C)  | 0.9512968  | 3(Si)-4(C)  | 0.95070465 |
| 3(Si)-8(C)  | 0.9540146  | 3(Si)-8(C)  | 0.95288486 | 3(Si)-8(C)  | 0.95419926 |
| 3(Si)-12(C) | 0.90921563 | 3(Si)-12(C) | 0.91442091 | 3(Si)-12(C) | 0.91443959 |
| 3(Si)-13(H) | 0.05628428 | 3(Si)-13(H) | 0.05690831 | 3(Si)-13(H) | 0.05662571 |
| 3(Si)-26(N) | 0.07705417 | 3(Si)-26(N) | 0.07722959 | 3(Si)-26(N) | 0.07795215 |
| 4(C)-5(H)   | 0.95948998 | 4(C)-5(H)   | 0.96060379 | 4(C)-5(H)   | 0.96008495 |
| 4(C)-6(H)   | 0.96428853 | 4(C)-6(H)   | 0.96337017 | 4(C)-6(H)   | 0.96311081 |
| 4(C)-7(H)   | 0.96300778 | 4(C)-7(H)   | 0.96293445 | 4(C)-7(H)   | 0.96267356 |
| 8(C)-9(H)   | 0.96013582 | 8(C)-9(H)   | 0.95939373 | 8(C)-9(H)   | 0.95997508 |
| 8(C)-10(H)  | 0.96291704 | 8(C)-10(H)  | 0.96288552 | 8(C)-10(H)  | 0.96273022 |
| 8(C)-11(H)  | 0.9591975  | 8(C)-11(H)  | 0.9583451  | 8(C)-11(H)  | 0.95876947 |
| 12(C)-13(H) | 0.94428689 | 12(C)-13(H) | 0.94277417 | 12(C)-13(H) | 0.94302828 |
| 12(C)-14(H) | 0.93852368 | 12(C)-14(H) | 0.93744953 | 12(C)-14(H) | 0.93748504 |
| 12(C)-26(N) | 1.11194169 | 12(C)-26(N) | 1.11218595 | 12(C)-26(N) | 1.11156817 |
| 12(C)-27(H) | 0.05910119 | 12(C)-27(H) | 0.0591818  | 12(C)-27(H) | 0.05910127 |
| 15(C)-16(H) | 0.96291725 | 15(C)-16(H) | 0.96276372 | 15(C)-16(H) | 0.96272758 |
| 15(C)-17(H) | 0.95919778 | 15(C)-17(H) | 0.95828657 | 15(C)-17(H) | 0.95876739 |
| 15(C)-18(H) | 0.96013549 | 15(C)-18(H) | 0.95936908 | 15(C)-18(H) | 0.95996537 |
| 19(C)-20(H) | 0.96428864 | 19(C)-20(H) | 0.96350495 | 19(C)-20(H) | 0.96311565 |
| 19(C)-21(H) | 0.96300755 | 19(C)-21(H) | 0.96295728 | 19(C)-21(H) | 0.96268411 |
| 19(C)-22(H) | 0.95949048 | 19(C)-22(H) | 0.96072217 | 19(C)-22(H) | 0.96009537 |
| 23(C)-24(H) | 0.93852391 | 23(C)-24(H) | 0.93755166 | 23(C)-24(H) | 0.93748684 |
| 23(C)-25(H) | 0.94428654 | 23(C)-25(H) | 0.94294927 | 23(C)-25(H) | 0.94302992 |
| 23(C)-28(N) | 1.11194184 | 23(C)-28(N) | 1.1114109  | 23(C)-28(N) | 1.11154135 |
| 23(C)-29(H) | 0.05910121 | 23(C)-29(H) | 0.05907016 | 23(C)-29(H) | 0.05909873 |
| 23(C)-36(C) | 0.07080552 | 23(C)-36(C) | 0.07076186 | 23(C)-36(C) | 0.0706528  |
| 26(N)-27(H) | 1.02358939 | 26(N)-27(H) | 1.02182672 | 26(N)-27(H) | 1.02197713 |
| 26(N)-30(C) | 1.12175731 | 26(N)-30(C) | 1.11917552 | 26(N)-30(C) | 1.11905663 |

|             |            |             |            |             |            |
|-------------|------------|-------------|------------|-------------|------------|
| 28(N)-29(H) | 1.02358954 | 28(N)-29(H) | 1.02199728 | 28(N)-29(H) | 1.02198036 |
| 28(N)-36(C) | 1.12175695 | 28(N)-36(C) | 1.1188779  | 28(N)-36(C) | 1.11905769 |
| 30(C)-31(H) | 0.92189702 | 30(C)-31(H) | 0.92205331 | 30(C)-31(H) | 0.92204204 |
| 30(C)-32(H) | 0.9236495  | 30(C)-32(H) | 0.92506936 | 30(C)-32(H) | 0.92496525 |
| 30(C)-33(C) | 1.03432722 | 30(C)-33(C) | 1.03610674 | 30(C)-33(C) | 1.03610791 |
| 33(C)-34(H) | 0.93195804 | 33(C)-34(H) | 0.93199306 | 33(C)-34(H) | 0.93203229 |
| 33(C)-35(H) | 0.93501514 | 33(C)-35(H) | 0.93631157 | 33(C)-35(H) | 0.93621492 |
| 33(C)-45(N) | 1.1411093  | 33(C)-45(N) | 1.13651988 | 33(C)-45(N) | 1.13659617 |
| 36(C)-37(H) | 0.92364969 | 36(C)-37(H) | 0.92509808 | 36(C)-37(H) | 0.92497498 |
| 36(C)-38(H) | 0.92189717 | 36(C)-38(H) | 0.92200028 | 36(C)-38(H) | 0.92204188 |
| 36(C)-39(C) | 1.03432735 | 36(C)-39(C) | 1.03619087 | 36(C)-39(C) | 1.03610749 |
| 39(C)-40(H) | 0.93195776 | 39(C)-40(H) | 0.93203037 | 39(C)-40(H) | 0.93202792 |
| 39(C)-41(H) | 0.93501508 | 39(C)-41(H) | 0.93629449 | 39(C)-41(H) | 0.93621615 |
| 39(C)-42(N) | 1.14111006 | 39(C)-42(N) | 1.13642954 | 39(C)-42(N) | 1.1365999  |
| 42(N)-43(H) | 1.04469216 | 42(N)-43(H) | 1.04234142 | 42(N)-43(H) | 1.04239486 |
| 42(N)-44(H) | 1.04648043 | 42(N)-44(H) | 1.04424438 | 42(N)-44(H) | 1.04432173 |
| 45(N)-46(H) | 1.04469214 | 45(N)-46(H) | 1.04232179 | 45(N)-46(H) | 1.04239609 |
| 45(N)-47(H) | 1.04648071 | 45(N)-47(H) | 1.04424507 | 45(N)-47(H) | 1.04432248 |

**Table S11.** Second Order Perturbation Theory Analysis of Fock Matrix in NBO Basis for:

*AEAMDS - vacuum*

| Donor NBO(i) | Acceptor NBO(j) | E(2) |
|--------------|-----------------|------|
| BD(1)C12-H13 | BD*(1)N26-C30   | 3.26 |
| BD(1)C12-N26 | BD*(1)C30-C33   | 1.84 |
| BD(1)C15-H17 | BD*(1)Si1-C23   | 1.58 |
| BD(1)C15-H18 | BD*(1)Si1-O2    | 1.75 |
| BD(1)Si1-C15 | BD*(1)Si1-C23   | 1.54 |
| BD(1)C19-H22 | BD*(1)Si1-O2    | 1.94 |
| BD(1)C23-H25 | BD*(1)Si1-C15   | 1.53 |
| BD(1)C23-H25 | BD*(1)N28-C36   | 3.26 |
| BD(1)C23-N28 | BD*(1)C36-C39   | 1.84 |
| BD(1)N26-H27 | BD*(1)Si3-C12   | 1.83 |
| BD(1)N26-H27 | BD*(1)C30-H32   | 2.45 |
| BD(1)N26-C30 | BD*(1)C33-N45   | 1.58 |
| BD(1)N28-H29 | BD*(1)Si1-C23   | 1.83 |
| BD(1)N28-H29 | BD*(1)C36-H37   | 2.45 |
| BD(1)N28-C36 | BD*(1)C39-N42   | 1.58 |
| BD(1)C30-H31 | BD*(1)C33-H35   | 2.45 |
| BD(1)C30-H32 | BD*(1)N26-H27   | 3.03 |
| BD(1)C30-H32 | BD*(1)C33-H34   | 2.69 |
| BD(1)C30-C33 | BD*(1)C12-N26   | 3.2  |
| BD(1)C30-C33 | BD*(1)N45-H46   | 1.8  |

|              |               |      |
|--------------|---------------|------|
| BD(1)C33-H34 | BD*(1)C30-H32 | 2.5  |
| BD(1)C33-H35 | BD*(1)C30-H31 | 2.88 |
| BD(1)C33-H35 | BD*(1)N45-H47 | 2.99 |
| BD(1)C33-N45 | BD*(1)N26-C30 | 1.91 |
| BD(1)C36-H37 | BD*(1)N28-H29 | 3.03 |
| BD(1)C36-H37 | BD*(1)C39-H40 | 2.69 |
| BD(1)C36-H38 | BD*(1)C39-H41 | 2.45 |
| BD(1)C36-C39 | BD*(1)C23-N28 | 3.2  |
| BD(1)C36-C39 | BD*(1)N42-H43 | 1.8  |
| BD(1)C39-H40 | BD*(1)C36-H37 | 2.5  |
| BD(1)C39-H41 | BD*(1)C36-H38 | 2.88 |
| BD(1)C39-H41 | BD*(1)N42-H44 | 2.99 |
| BD(1)C39-N42 | BD*(1)N28-C36 | 1.91 |
| BD(1)N42-H43 | BD*(1)C36-C39 | 2.62 |
| BD(1)N42-H44 | BD*(1)C39-H41 | 2.12 |
| BD(1)N45-H46 | BD*(1)C30-C33 | 2.62 |
| BD(1)N45-H47 | BD*(1)C33-H35 | 2.12 |
| CR(2)Si1     | BD*(1)Si1-O2  | 2.28 |
| CR(2)Si1     | BD*(1)O2-Si3  | 2.4  |
| CR(2)Si3     | BD*(1)Si1-O2  | 2.4  |
| CR(2)Si3     | BD*(1)O2-Si3  | 2.28 |
| BD(1)Si1-C19 | BD*(1)Si1-O2  | 2.92 |
| LP(1)O2      | RY*(2)Si1     | 1.64 |
| LP(1)O2      | RY*(2)Si3     | 1.62 |
| LP(1)O2      | BD*(1)Si1-C19 | 5.4  |
| LP(1)O2      | BD*(1)Si1-C23 | 5.35 |
| LP(1)O2      | BD*(1)Si3-C4  | 5.48 |



|              |               |      |
|--------------|---------------|------|
| LP(1)O2      | BD*(1)Si3-C12 | 5.28 |
| LP(2)O2      | RY*(1)Si1     | 1.69 |
| LP(2)O2      | RY*(1)Si3     | 1.68 |
| LP(2)O2      | BD*(1)Si1-C15 | 7.31 |
| LP(2)O2      | BD*(1)Si1-C19 | 2.18 |
| LP(2)O2      | BD*(1)Si1-C23 | 1.61 |
| LP(2)O2      | BD*(1)Si3-C4  | 2.1  |
| LP(2)O2      | BD*(1)Si3-C8  | 7.32 |
| LP(2)O2      | BD*(1)Si3-C12 | 1.68 |
| LP(1)N26     | RY*(2)H27     | 1.5  |
| LP(1)N26     | BD*(1)C12-H14 | 6.35 |
| LP(1)N26     | BD*(1)C30-H31 | 8.16 |
| LP(1)N28     | RY*(2)H29     | 1.5  |
| LP(1)N28     | BD*(1)C23-H24 | 6.35 |
| LP(1)N28     | BD*(1)C36-H38 | 8.16 |
| LP(1)N42     | BD*(1)C39-H40 | 7.87 |
| LP(1)N45     | BD*(1)C33-H34 | 7.87 |
| BD(1)Si1-C23 | RY*(1)N28     | 1.85 |
| BD(1)Si1-C23 | BD*(1)Si1-O2  | 2.8  |
| BD(1)Si1-C23 | BD*(1)N28-H29 | 2.11 |
| BD(1)O2-Si3  | BD*(1)Si1-O2  | 1.94 |
| BD(1)Si1-O2  | BD*(1)O2-Si3  | 1.94 |
| BD(1)Si3-C4  | BD*(1)O2-Si3  | 2.93 |
| BD(1)Si3-C8  | BD*(1)O2-Si3  | 2.74 |
| BD(1)Si3-C8  | BD*(1)Si3-C12 | 1.54 |
| BD(1)Si3-C12 | RY*(1)N26     | 1.85 |
| BD(1)Si3-C12 | BD*(1)O2-Si3  | 2.8  |
| BD(1)Si3-C12 | BD*(1)N26-H27 | 2.11 |
| BD(1)Si1-C15 | BD*(1)Si1-O2  | 2.74 |
| BD(1)C4-H5   | BD*(1)O2-Si3  | 1.94 |
| BD(1)C8-H9   | BD*(1)O2-Si3  | 1.75 |
| BD(1)C8-H11  | BD*(1)Si3-C12 | 1.58 |
| BD(1)C12-H13 | BD*(1)Si3-C8  | 1.53 |

**AEAMDS - water**

| Donor NBO(i) | Acceptor NBO(j) | E(2) |
|--------------|-----------------|------|
| BD(1)C15-H18 | BD*(1)Si1-O2    | 1.81 |
| BD(1)C19-H22 | BD*(1)Si1-O2    | 1.89 |
| BD(1)C23-H25 | BD*(1)Si1-C15   | 1.59 |
| BD(1)C23-H25 | BD*(1)N28-C36   | 3.25 |
| BD(1)Si1-C15 | BD*(1)Si1-C23   | 1.5  |
| BD(1)C23-N28 | BD*(1)C36-C39   | 1.86 |
| BD(1)N26-H27 | BD*(1)Si3-C12   | 1.99 |
| BD(1)N26-H27 | BD*(1)C30-H32   | 2.51 |
| BD(1)N26-C30 | BD*(1)C33-N45   | 1.6  |
| BD(1)N28-H29 | BD*(1)Si1-C23   | 1.96 |
| BD(1)N28-H29 | BD*(1)C36-H37   | 2.51 |

|              |               |      |
|--------------|---------------|------|
| BD(1)N28-C36 | BD*(1)C39-N42 | 1.6  |
| BD(1)C30-H31 | BD*(1)C33-H35 | 2.49 |
| BD(1)C30-H32 | BD*(1)N26-H27 | 2.85 |
| BD(1)C30-H32 | BD*(1)C33-H34 | 2.61 |
| BD(1)C30-C33 | BD*(1)C12-N26 | 3.14 |
| BD(1)C30-C33 | BD*(1)N45-H46 | 1.65 |
| BD(1)C33-H34 | BD*(1)C30-H32 | 2.58 |
| BD(1)C33-H35 | BD*(1)C30-H31 | 2.82 |
| BD(1)C33-H35 | BD*(1)N45-H47 | 2.77 |
| BD(1)C33-N45 | BD*(1)N26-C30 | 1.96 |
| BD(1)C36-H37 | BD*(1)N28-H29 | 2.85 |
| BD(1)C36-H37 | BD*(1)C39-H40 | 2.61 |
| BD(1)C36-H38 | BD*(1)C39-H41 | 2.49 |
| BD(1)C36-C39 | BD*(1)C23-N28 | 3.13 |
| BD(1)C36-C39 | BD*(1)N42-H43 | 1.65 |
| BD(1)C39-H40 | BD*(1)C36-H37 | 2.58 |
| BD(1)C39-H41 | BD*(1)C36-H38 | 2.83 |
| BD(1)C39-H41 | BD*(1)N42-H44 | 2.77 |
| BD(1)C39-N42 | BD*(1)N28-C36 | 1.97 |
| BD(1)N42-H43 | BD*(1)C36-C39 | 2.69 |
| BD(1)N42-H44 | BD*(1)C39-H41 | 2.17 |
| BD(1)N45-H46 | BD*(1)C30-C33 | 2.69 |
| BD(1)N45-H47 | BD*(1)C33-H35 | 2.17 |
| CR(2)Si1     | BD*(1)Si1-O2  | 2.32 |
| CR(2)Si1     | BD*(1)O2-Si3  | 2.25 |
| CR(2)Si3     | BD*(1)Si1-O2  | 2.24 |
| CR(2)Si3     | BD*(1)O2-Si3  | 2.31 |
| BD(1)Si1-C19 | BD*(1)Si1-O2  | 2.87 |
| LP(1)O2      | RY*(2)Si1     | 1.58 |
| LP(1)O2      | RY*(2)Si3     | 1.68 |
| LP(1)O2      | BD*(1)Si1-C15 | 3.43 |
| LP(1)O2      | BD*(1)Si1-C23 | 5.63 |
| LP(1)O2      | BD*(1)Si3-C8  | 2.48 |
| LP(1)O2      | BD*(1)Si3-C12 | 5.86 |
| LP(2)O2      | RY*(1)Si1     | 1.77 |
| LP(2)O2      | RY*(1)Si3     | 1.84 |
| LP(2)O2      | BD*(1)Si1-C15 | 3.98 |
| LP(2)O2      | BD*(1)Si1-C19 | 6.77 |
| LP(2)O2      | BD*(1)Si3-C4  | 6.12 |
| LP(2)O2      | BD*(1)Si3-C8  | 4.96 |
| LP(1)N26     | BD*(1)C12-H14 | 6.39 |
| LP(1)N26     | BD*(1)C30-H31 | 7.72 |
| LP(1)N28     | BD*(1)C23-H24 | 6.29 |
| LP(1)N28     | BD*(1)C36-H38 | 7.7  |
| LP(1)N42     | BD*(1)C39-H40 | 7.23 |
| LP(1)N45     | BD*(1)C33-H34 | 7.23 |

|              |               |      |
|--------------|---------------|------|
| BD(1)Si1-C23 | RY*(1)N28     | 1.79 |
| BD(1)Si1-C23 | BD*(1)Si1-O2  | 2.68 |
| BD(1)Si1-C23 | BD*(1)N28-H29 | 2.03 |
| BD(1)O2-Si3  | BD*(1)Si1-O2  | 1.83 |
| BD(1)Si3-C4  | BD*(1)O2-Si3  | 2.91 |
| BD(1)Si1-O2  | BD*(1)O2-Si3  | 1.83 |
| BD(1)Si3-C8  | BD*(1)O2-Si3  | 3.01 |
| BD(1)Si3-C8  | BD*(1)Si3-C12 | 1.51 |
| BD(1)Si3-C12 | RY*(1)N26     | 1.76 |
| BD(1)Si3-C12 | BD*(1)O2-Si3  | 2.69 |
| BD(1)Si3-C12 | BD*(1)N26-H27 | 2.05 |
| BD(1)C4-H5   | BD*(1)O2-Si3  | 1.9  |
| BD(1)C8-H9   | BD*(1)O2-Si3  | 1.8  |
| BD(1)Si1-C15 | BD*(1)Si1-O2  | 3.05 |
| BD(1)C8-H11  | BD*(1)Si3-C12 | 1.6  |
| BD(1)C12-H13 | BD*(1)Si3-C8  | 1.61 |
| BD(1)C12-H13 | BD*(1)N26-C30 | 3.3  |
| BD(1)C12-N26 | BD*(1)C30-C33 | 1.85 |
| BD(1)C15-H17 | BD*(1)Si1-C23 | 1.6  |

**AEAMDS - methanol**

| Donor NBO(i) | Acceptor NBO(j) | E(2) |
|--------------|-----------------|------|
| BD(1)Si1-C15 | BD*(1)Si1-O2    | 2.76 |
| BD(1)C12-N26 | BD*(1)C30-C33   | 1.85 |
| BD(1)C15-H17 | BD*(1)Si1-C23   | 1.59 |
| BD(1)C15-H18 | BD*(1)Si1-O2    | 1.77 |
| BD(1)C19-H22 | BD*(1)Si1-O2    | 1.92 |
| BD(1)Si1-C15 | BD*(1)Si1-C19   | 1.5  |
| BD(1)C23-H25 | BD*(1)Si1-C15   | 1.59 |
| BD(1)C23-H25 | BD*(1)N28-C36   | 3.26 |
| BD(1)C23-N28 | BD*(1)C36-C39   | 1.85 |
| BD(1)N26-H27 | BD*(1)Si3-C12   | 1.97 |
| BD(1)Si1-C15 | BD*(1)Si1-C23   | 1.54 |
| BD(1)N26-H27 | BD*(1)C30-H32   | 2.51 |
| BD(1)N26-C30 | BD*(1)C33-N45   | 1.6  |
| BD(1)N28-H29 | BD*(1)Si1-C23   | 1.96 |
| BD(1)N28-H29 | BD*(1)C36-H37   | 2.51 |
| BD(1)N28-C36 | BD*(1)C39-N42   | 1.6  |
| BD(1)C30-H31 | BD*(1)C33-H35   | 2.49 |
| BD(1)C30-H32 | BD*(1)N26-H27   | 2.86 |
| BD(1)C30-H32 | BD*(1)C33-H34   | 2.61 |
| BD(1)C30-C33 | BD*(1)C12-N26   | 3.14 |
| BD(1)C30-C33 | BD*(1)N45-H46   | 1.66 |
| BD(1)C33-H34 | BD*(1)C30-H32   | 2.58 |
| BD(1)C33-H35 | BD*(1)C30-H31   | 2.83 |
| BD(1)C33-H35 | BD*(1)N45-H47   | 2.78 |
| BD(1)C33-N45 | BD*(1)N26-C30   | 1.96 |

|              |               |      |
|--------------|---------------|------|
| BD(1)C36-H37 | BD*(1)N28-H29 | 2.86 |
| BD(1)C36-H37 | BD*(1)C39-H40 | 2.61 |
| BD(1)C36-H38 | BD*(1)C39-H41 | 2.49 |
| BD(1)C36-C39 | BD*(1)C23-N28 | 3.14 |
| BD(1)C36-C39 | BD*(1)N42-H43 | 1.66 |
| BD(1)C39-H40 | BD*(1)C36-H37 | 2.58 |
| BD(1)C39-H41 | BD*(1)C36-H38 | 2.83 |
| BD(1)C39-H41 | BD*(1)N42-H44 | 2.78 |
| BD(1)C39-N42 | BD*(1)N28-C36 | 1.96 |
| BD(1)N42-H43 | BD*(1)C36-C39 | 2.69 |
| BD(1)N42-H44 | BD*(1)C39-H41 | 2.17 |
| BD(1)N45-H46 | BD*(1)C30-C33 | 2.69 |
| BD(1)N45-H47 | BD*(1)C33-H35 | 2.17 |
| CR(2)Si1     | BD*(1)Si1-O2  | 2.31 |
| CR(2)Si1     | BD*(1)O2-Si3  | 2.25 |
| CR(2)Si3     | BD*(1)Si1-O2  | 2.25 |
| CR(2)Si3     | BD*(1)O2-Si3  | 2.31 |
| LP(1)O2      | RY*(2)Si1     | 1.59 |
| LP(1)O2      | RY*(2)Si3     | 1.58 |
| LP(1)O2      | BD*(1)Si1-C19 | 5.41 |
| LP(1)O2      | BD*(1)Si1-C23 | 4.47 |
| LP(1)O2      | BD*(1)Si3-C4  | 5.51 |
| LP(1)O2      | BD*(1)Si3-C12 | 4.39 |
| LP(2)O2      | RY*(1)Si1     | 1.7  |
| LP(2)O2      | RY*(1)Si3     | 1.68 |
| LP(2)O2      | BD*(1)Si1-C15 | 7.28 |
| LP(2)O2      | BD*(1)Si1-C19 | 1.96 |
| LP(2)O2      | BD*(1)Si1-C23 | 1.72 |
| BD(1)Si1-C19 | BD*(1)Si1-O2  | 3.12 |
| LP(2)O2      | BD*(1)Si3-C4  | 1.86 |
| LP(2)O2      | BD*(1)Si3-C8  | 7.28 |
| LP(2)O2      | BD*(1)Si3-C12 | 1.82 |
| LP(1)N26     | BD*(1)C12-H14 | 6.32 |
| LP(1)N26     | BD*(1)C30-H31 | 7.73 |
| LP(1)N28     | BD*(1)C23-H24 | 6.31 |
| LP(1)N28     | BD*(1)C36-H38 | 7.73 |
| LP(1)N42     | BD*(1)C39-H40 | 7.25 |
| LP(1)N45     | BD*(1)C33-H34 | 7.25 |
| BD(1)Si1-C23 | RY*(1)N28     | 1.78 |
| BD(1)Si1-C23 | BD*(1)Si1-O2  | 2.73 |
| BD(1)Si1-C23 | BD*(1)N28-H29 | 2.03 |
| BD(1)O2-Si3  | BD*(1)Si1-O2  | 1.85 |
| BD(1)Si3-C4  | BD*(1)O2-Si3  | 3.12 |
| BD(1)Si1-O2  | BD*(1)O2-Si3  | 1.85 |
| BD(1)Si3-C8  | BD*(1)O2-Si3  | 2.75 |
| BD(1)Si3-C8  | BD*(1)Si3-C4  | 1.5  |

|              |               |      |
|--------------|---------------|------|
| BD(1)Si3-C8  | BD*(1)Si3-C12 | 1.54 |
| BD(1)Si3-C12 | RY*(1)N26     | 1.78 |
| BD(1)Si3-C12 | BD*(1)O2-Si3  | 2.73 |
| BD(1)Si3-C12 | BD*(1)N26-H27 | 2.04 |
| BD(1)C4-H5   | BD*(1)O2-Si3  | 1.92 |

|              |               |      |
|--------------|---------------|------|
| BD(1)C8-H9   | BD*(1)O2-Si3  | 1.77 |
| BD(1)C8-H11  | BD*(1)Si3-C12 | 1.59 |
| BD(1)C12-H13 | BD*(1)Si3-C8  | 1.59 |
| BD(1)C12-H13 | BD*(1)N26-C30 | 3.27 |

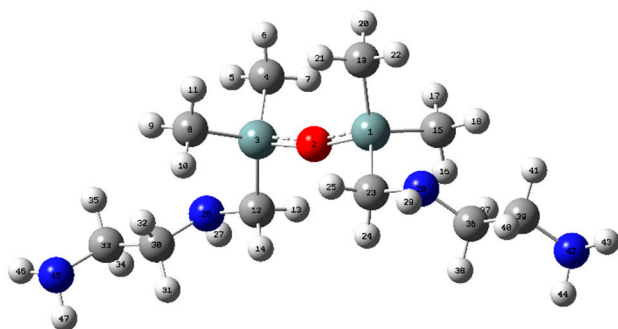

**Figure S5.** AEAMDS – Atoms labels

**Table S12.** Wiberg bond order for APTMDS

| Vacuum      |            | Water       |            | Methanol    |            |
|-------------|------------|-------------|------------|-------------|------------|
| Bond        | bond order | Bond        | bond order | Bond        | bond order |
| 1(Si)-2(O)  | 1.12976248 | 1(Si)-2(O)  | 1.1201774  | 1(Si)-2(O)  | 1.12063325 |
| 1(Si)-4(C)  | 0.95079672 | 1(Si)-4(C)  | 0.95279289 | 1(Si)-4(C)  | 0.9526888  |
| 1(Si)-12(C) | 0.94823757 | 1(Si)-12(C) | 0.94910284 | 1(Si)-12(C) | 0.94902269 |
| 1(Si)-20(C) | 0.91582389 | 1(Si)-20(C) | 0.91594023 | 1(Si)-20(C) | 0.91594935 |
| 1(Si)-21(H) | 0.05380026 | 1(Si)-21(H) | 0.0538076  | 1(Si)-21(H) | 0.05380094 |
| 1(Si)-22(H) | 0.05436743 | 1(Si)-22(H) | 0.05428096 | 1(Si)-22(H) | 0.0542905  |
| 1(Si)-32(C) | 0.06039288 | 1(Si)-32(C) | 0.06072579 | 1(Si)-32(C) | 0.06072583 |
| 2(O)-3(Si)  | 1.12903873 | 2(O)-3(Si)  | 1.12003204 | 2(O)-3(Si)  | 1.12042926 |
| 3(Si)-8(C)  | 0.94777339 | 3(Si)-8(C)  | 0.94915984 | 3(Si)-8(C)  | 0.9490949  |
| 3(Si)-16(C) | 0.950709   | 3(Si)-16(C) | 0.9526878  | 3(Si)-16(C) | 0.95255628 |
| 3(Si)-23(C) | 0.91623915 | 3(Si)-23(C) | 0.91598705 | 3(Si)-23(C) | 0.91600624 |
| 3(Si)-26(C) | 0.06070231 | 3(Si)-26(C) | 0.06072331 | 3(Si)-26(C) | 0.06073963 |
| 4(C)-5(H)   | 0.96319916 | 4(C)-5(H)   | 0.96201015 | 4(C)-5(H)   | 0.96208915 |
| 4(C)-6(H)   | 0.96274985 | 4(C)-6(H)   | 0.96286937 | 4(C)-6(H)   | 0.96286361 |
| 4(C)-7(H)   | 0.9633855  | 4(C)-7(H)   | 0.96328781 | 4(C)-7(H)   | 0.96329229 |
| 8(C)-9(H)   | 0.96321386 | 8(C)-9(H)   | 0.96307636 | 8(C)-9(H)   | 0.96310852 |
| 8(C)-10(H)  | 0.96301838 | 8(C)-10(H)  | 0.96281157 | 8(C)-10(H)  | 0.96283626 |
| 8(C)-11(H)  | 0.96283981 | 8(C)-11(H)  | 0.96162788 | 8(C)-11(H)  | 0.96171637 |
| 12(C)-13(H) | 0.96246126 | 12(C)-13(H) | 0.96137986 | 12(C)-13(H) | 0.96142664 |
| 12(C)-14(H) | 0.96290224 | 12(C)-14(H) | 0.96285111 | 12(C)-14(H) | 0.96281655 |
| 12(C)-15(H) | 0.96245949 | 12(C)-15(H) | 0.96267028 | 12(C)-15(H) | 0.96264487 |
| 16(C)-17(H) | 0.96264075 | 16(C)-17(H) | 0.96274176 | 16(C)-17(H) | 0.96272623 |
| 16(C)-18(H) | 0.9631659  | 16(C)-18(H) | 0.9632806  | 16(C)-18(H) | 0.96327683 |
| 16(C)-19(H) | 0.96307434 | 16(C)-19(H) | 0.96189167 | 16(C)-19(H) | 0.96196829 |
| 20(C)-21(H) | 0.93127735 | 20(C)-21(H) | 0.93337519 | 20(C)-21(H) | 0.93331779 |

|             |            |             |            |             |            |
|-------------|------------|-------------|------------|-------------|------------|
| 20(C)-22(H) | 0.93674198 | 20(C)-22(H) | 0.936266   | 20(C)-22(H) | 0.9363105  |
| 20(C)-32(C) | 1.04676952 | 20(C)-32(C) | 1.04575545 | 20(C)-32(C) | 1.04580266 |
| 23(C)-24(H) | 0.93631417 | 23(C)-24(H) | 0.93562327 | 23(C)-24(H) | 0.93564601 |
| 23(C)-25(H) | 0.93138931 | 23(C)-25(H) | 0.9337759  | 23(C)-25(H) | 0.93365162 |
| 23(C)-26(C) | 1.04663244 | 23(C)-26(C) | 1.04570371 | 23(C)-26(C) | 1.0457166  |
| 26(C)-27(H) | 0.92510686 | 26(C)-27(H) | 0.92463792 | 26(C)-27(H) | 0.92466395 |
| 26(C)-28(H) | 0.92579    | 26(C)-28(H) | 0.92454715 | 26(C)-28(H) | 0.924605   |
| 26(C)-29(C) | 1.03368541 | 26(C)-29(C) | 1.03517569 | 26(C)-29(C) | 1.03511344 |
| 29(C)-30(H) | 0.93535776 | 29(C)-30(H) | 0.93583925 | 29(C)-30(H) | 0.93581527 |
| 29(C)-31(H) | 0.93365008 | 29(C)-31(H) | 0.93321947 | 29(C)-31(H) | 0.93323961 |
| 29(C)-41(N) | 1.13691549 | 29(C)-41(N) | 1.13321965 | 29(C)-41(N) | 1.13336348 |
| 32(C)-33(H) | 0.92515596 | 32(C)-33(H) | 0.92473963 | 32(C)-33(H) | 0.92475761 |
| 32(C)-34(H) | 0.92577368 | 32(C)-34(H) | 0.92435067 | 32(C)-34(H) | 0.92441244 |
| 32(C)-35(C) | 1.03378801 | 32(C)-35(C) | 1.03526637 | 32(C)-35(C) | 1.03522201 |
| 35(C)-36(H) | 0.93367273 | 35(C)-36(H) | 0.93319791 | 35(C)-36(H) | 0.9332133  |
| 35(C)-37(H) | 0.93541088 | 35(C)-37(H) | 0.9358462  | 35(C)-37(H) | 0.93582903 |
| 35(C)-38(N) | 1.13675534 | 35(C)-38(N) | 1.13330663 | 35(C)-38(N) | 1.13345907 |
| 38(N)-39(H) | 1.04604726 | 38(N)-39(H) | 1.04391624 | 38(N)-39(H) | 1.04397848 |
| 38(N)-40(H) | 1.04534423 | 38(N)-40(H) | 1.0432803  | 38(N)-40(H) | 1.0433405  |
| 41(N)-42(H) | 1.04535605 | 41(N)-42(H) | 1.04330661 | 41(N)-42(H) | 1.04336211 |
| 41(N)-43(H) | 1.04615228 | 41(N)-43(H) | 1.0439534  | 41(N)-43(H) | 1.04402796 |

**Table S13.** Second Order Perturbation Theory Analysis of Fock Matrix in NBO Basis for:

**APTMDS - vacuum**

| Donor NBO(i) | Acceptor NBO(j) | E(2) |
|--------------|-----------------|------|
| BD(1)C20-C32 | RY*(1)C35       | 1.52 |
| BD(1)C23-C26 | RY*(1)C29       | 1.52 |
| BD(1)Si1-C4  | BD*(1)Si1-O2    | 2.26 |
| BD(1)C16-H19 | BD*(1)O2-Si3    | 1.73 |
| BD(1)C20-H21 | BD*(1)C32-H34   | 3.02 |
| BD(1)C20-H22 | BD*(1)C32-H33   | 3.14 |
| BD(1)C23-H24 | BD*(1)C26-H27   | 3.14 |
| BD(1)C23-H25 | BD*(1)C26-H28   | 3.01 |
| BD(1)C26-H27 | BD*(1)C23-H24   | 2.83 |
| BD(1)C26-H27 | BD*(1)C29-H30   | 2.68 |
| BD(1)C26-H28 | BD*(1)C23-H25   | 2.7  |
| BD(1)C26-H28 | BD*(1)C29-N41   | 3.54 |
| BD(1)C26-C29 | BD*(1)Si3-C23   | 1.79 |
| BD(1)C26-C29 | BD*(1)N41-H42   | 1.78 |
| BD(1)C29-H30 | BD*(1)C26-H27   | 2.8  |
| BD(1)C29-H30 | BD*(1)N41-H43   | 2.97 |
| BD(1)C29-H31 | BD*(1)C23-C26   | 3.53 |

|              |               |      |
|--------------|---------------|------|
| BD(1)C32-H33 | BD*(1)C20-H22 | 2.82 |
| BD(1)C32-H33 | BD*(1)C35-H37 | 2.69 |
| BD(1)C32-H34 | BD*(1)C20-H21 | 2.71 |
| BD(1)C32-H34 | BD*(1)C35-N38 | 3.54 |
| BD(1)C32-C35 | BD*(1)Si1-C20 | 1.79 |
| BD(1)C32-C35 | BD*(1)N38-H40 | 1.78 |
| BD(1)C35-H36 | BD*(1)C20-C32 | 3.53 |
| BD(1)C35-H37 | BD*(1)C32-H33 | 2.79 |
| BD(1)C35-H37 | BD*(1)N38-H39 | 2.97 |
| BD(1)N38-H39 | BD*(1)C35-H37 | 2.13 |
| BD(1)N38-H40 | BD*(1)C32-C35 | 2.75 |
| BD(1)N41-H42 | BD*(1)C26-C29 | 2.75 |
| BD(1)N41-H43 | BD*(1)C29-H30 | 2.13 |
| CR(2)Si1     | BD*(1)Si1-O2  | 2.41 |
| CR(2)Si1     | BD*(1)O2-Si3  | 2.36 |
| CR(2)Si3     | BD*(1)Si1-O2  | 2.36 |
| CR(2)Si3     | BD*(1)O2-Si3  | 2.41 |
| LP(1)O2      | RY*(2)Si1     | 1.92 |
| LP(1)O2      | RY*(2)Si3     | 1.85 |
| LP(1)O2      | BD*(1)Si1-C4  | 5.85 |
| LP(1)O2      | BD*(1)Si1-C20 | 3.59 |
| LP(1)O2      | BD*(1)Si3-C16 | 5.17 |
| LP(1)O2      | BD*(1)Si3-C23 | 4.8  |
| LP(2)O2      | RY*(1)Si1     | 1.99 |

|              |               |      |
|--------------|---------------|------|
| LP(2)O2      | RY*(1)Si3     | 1.89 |
| LP(2)O2      | BD*(1)Si1-C12 | 7.07 |
| LP(2)O2      | BD*(1)Si1-C20 | 3.69 |
| LP(2)O2      | BD*(1)Si3-C8  | 7.45 |
| LP(2)O2      | BD*(1)Si3-C23 | 2.44 |
| LP(1)N38     | BD*(1)C35-H36 | 7.38 |
| BD(1)Si1-C12 | BD*(1)Si1-O2  | 2.65 |
| LP(1)N41     | BD*(1)C29-H31 | 7.39 |
| BD(1)Si1-C20 | BD*(1)Si1-O2  | 3.19 |
| BD(1)Si1-C20 | BD*(1)C32-C35 | 3.48 |
| BD(1)O2-Si3  | BD*(1)Si1-O2  | 1.94 |
| BD(1)Si1-O2  | BD*(1)O2-Si3  | 1.94 |
| BD(1)Si3-C8  | BD*(1)O2-Si3  | 2.6  |
| BD(1)Si3-C16 | BD*(1)O2-Si3  | 2.28 |
| BD(1)Si3-C23 | BD*(1)O2-Si3  | 3.23 |
| BD(1)Si3-C23 | BD*(1)C26-C29 | 3.48 |
| BD(1)C4-H5   | BD*(1)Si1-O2  | 1.74 |
| BD(1)C8-H11  | BD*(1)O2-Si3  | 1.77 |
| BD(1)C12-H13 | BD*(1)Si1-O2  | 1.78 |

**APTMDs - water**

|              |               |      |
|--------------|---------------|------|
| BD(1)C20-C32 | RY*(1)C35     | 1.52 |
| BD(1)C23-C26 | RY*(1)C29     | 1.52 |
| BD(1)Si1-O2  | RY*(7)Si3     | 1.55 |
| BD(1)C12-H13 | BD*(1)Si1-O2  | 1.84 |
| BD(1)C16-H19 | BD*(1)O2-Si3  | 1.78 |
| BD(1)Si1-C4  | BD*(1)Si1-O2  | 2.28 |
| BD(1)C20-H21 | BD*(1)C32-H34 | 2.92 |
| BD(1)C20-H22 | BD*(1)C32-H33 | 3.06 |
| BD(1)C23-H24 | BD*(1)C26-H27 | 3.05 |
| BD(1)C23-H25 | BD*(1)C26-H28 | 2.93 |
| BD(1)C26-H27 | BD*(1)C23-H24 | 2.88 |
| BD(1)C26-H27 | BD*(1)C29-H30 | 2.68 |
| BD(1)C26-H28 | BD*(1)C23-H25 | 2.84 |
| BD(1)C26-H28 | BD*(1)C29-N41 | 3.63 |
| BD(1)C26-C29 | BD*(1)Si3-C23 | 1.82 |
| BD(1)C26-C29 | BD*(1)N41-H42 | 1.64 |
| BD(1)C29-H30 | BD*(1)C26-H27 | 2.79 |
| BD(1)C29-H30 | BD*(1)N41-H43 | 2.79 |
| BD(1)C29-H31 | BD*(1)C23-C26 | 3.65 |
| BD(1)C32-H33 | BD*(1)C20-H22 | 2.86 |
| BD(1)C32-H33 | BD*(1)C35-H37 | 2.68 |
| BD(1)C32-H34 | BD*(1)C20-H21 | 2.86 |
| BD(1)C32-H34 | BD*(1)C35-N38 | 3.63 |
| BD(1)C32-C35 | BD*(1)Si1-C20 | 1.81 |
| BD(1)C32-C35 | BD*(1)N38-H40 | 1.64 |
| BD(1)C35-H36 | BD*(1)C20-C32 | 3.66 |

|              |               |      |
|--------------|---------------|------|
| BD(1)C35-H37 | BD*(1)C32-H33 | 2.79 |
| BD(1)C35-H37 | BD*(1)N38-H39 | 2.8  |
| BD(1)N38-H39 | BD*(1)C35-H37 | 2.2  |
| BD(1)N38-H40 | BD*(1)C32-C35 | 2.88 |
| BD(1)N41-H42 | BD*(1)C26-C29 | 2.88 |
| BD(1)N41-H43 | BD*(1)C29-H30 | 2.2  |
| CR(2)Si1     | BD*(1)Si1-O2  | 2.47 |
| CR(2)Si1     | BD*(1)O2-Si3  | 2.21 |
| CR(2)Si3     | BD*(1)Si1-O2  | 2.21 |
| CR(2)Si3     | BD*(1)O2-Si3  | 2.47 |
| LP(1)O2      | RY*(2)Si1     | 1.85 |
| LP(1)O2      | RY*(2)Si3     | 1.83 |
| LP(1)O2      | BD*(1)Si1-C4  | 4.91 |
| LP(1)O2      | BD*(1)Si1-C20 | 3.98 |
| LP(1)O2      | BD*(1)Si3-C16 | 4.6  |
| LP(1)O2      | BD*(1)Si3-C23 | 4.51 |
| LP(2)O2      | RY*(1)Si1     | 1.92 |
| LP(2)O2      | RY*(1)Si3     | 1.85 |
| LP(2)O2      | BD*(1)Si1-C12 | 7.22 |
| LP(2)O2      | BD*(1)Si1-C20 | 3.07 |
| LP(2)O2      | BD*(1)Si3-C8  | 7.36 |
| LP(2)O2      | BD*(1)Si3-C23 | 2.49 |
| LP(1)N38     | BD*(1)C35-H36 | 6.89 |
| BD(1)Si1-C12 | BD*(1)Si1-O2  | 2.71 |
| LP(1)N41     | BD*(1)C29-H31 | 6.89 |
| BD(1)Si1-C20 | BD*(1)Si1-O2  | 3.35 |
| BD(1)Si1-C20 | BD*(1)C32-C35 | 3.47 |
| BD(1)O2-Si3  | RY*(7)Si1     | 1.76 |
| BD(1)O2-Si3  | BD*(1)Si1-O2  | 1.83 |
| BD(1)Si1-O2  | BD*(1)O2-Si3  | 1.83 |
| BD(1)Si3-C8  | BD*(1)O2-Si3  | 2.68 |
| BD(1)Si3-C16 | BD*(1)O2-Si3  | 2.3  |
| BD(1)Si3-C23 | BD*(1)O2-Si3  | 3.37 |
| BD(1)Si3-C23 | BD*(1)C26-C29 | 3.46 |
| BD(1)C4-H5   | BD*(1)Si1-O2  | 1.79 |
| BD(1)C8-H11  | BD*(1)O2-Si3  | 1.85 |

**APTMDs - methanol**

| Donor NBO(i) | Acceptor NBO(j) | E(2) |
|--------------|-----------------|------|
| BD(1)C20-C32 | RY*(1)C35       | 1.52 |
| BD(1)C23-C26 | RY*(1)C29       | 1.52 |
| BD(1)Si1-O2  | RY*(7)Si3       | 1.55 |
| BD(1)C12-H13 | BD*(1)Si1-O2    | 1.84 |
| BD(1)C16-H19 | BD*(1)O2-Si3    | 1.78 |
| BD(1)Si1-C4  | BD*(1)Si1-O2    | 2.28 |
| BD(1)C20-H21 | BD*(1)C32-H34   | 2.92 |
| BD(1)C20-H22 | BD*(1)C32-H33   | 3.06 |

|              |               |      |
|--------------|---------------|------|
| BD(1)C23-H24 | BD*(1)C26-H27 | 3.06 |
| BD(1)C23-H25 | BD*(1)C26-H28 | 2.93 |
| BD(1)C26-H27 | BD*(1)C23-H24 | 2.88 |
| BD(1)C26-H27 | BD*(1)C29-H30 | 2.67 |
| BD(1)C26-H28 | BD*(1)C23-H25 | 2.83 |
| BD(1)C26-H28 | BD*(1)C29-N41 | 3.62 |
| BD(1)C26-C29 | BD*(1)Si3-C23 | 1.81 |
| BD(1)C26-C29 | BD*(1)N41-H42 | 1.64 |
| BD(1)C29-H30 | BD*(1)C26-H27 | 2.79 |
| BD(1)C29-H30 | BD*(1)N41-H43 | 2.8  |
| BD(1)C29-H31 | BD*(1)C23-C26 | 3.65 |
| BD(1)C32-H33 | BD*(1)C20-H22 | 2.86 |
| BD(1)C32-H33 | BD*(1)C35-H37 | 2.68 |
| BD(1)C32-H34 | BD*(1)C20-H21 | 2.86 |
| BD(1)C32-H34 | BD*(1)C35-N38 | 3.63 |
| BD(1)C32-C35 | BD*(1)Si1-C20 | 1.81 |
| BD(1)C32-C35 | BD*(1)N38-H40 | 1.64 |
| BD(1)C35-H36 | BD*(1)C20-C32 | 3.65 |
| BD(1)C35-H37 | BD*(1)C32-H33 | 2.79 |
| BD(1)C35-H37 | BD*(1)N38-H39 | 2.8  |
| BD(1)N38-H39 | BD*(1)C35-H37 | 2.2  |
| BD(1)N38-H40 | BD*(1)C32-C35 | 2.88 |
| BD(1)N41-H42 | BD*(1)C26-C29 | 2.88 |
| BD(1)N41-H43 | BD*(1)C29-H30 | 2.2  |
| CR(2)Si1     | BD*(1)Si1-O2  | 2.46 |
| CR(2)Si1     | BD*(1)O2-Si3  | 2.22 |
| CR(2)Si3     | BD*(1)Si1-O2  | 2.22 |

|              |               |      |
|--------------|---------------|------|
| CR(2)Si3     | BD*(1)O2-Si3  | 2.47 |
| LP(1)O2      | RY*(2)Si1     | 1.87 |
| LP(1)O2      | RY*(2)Si3     | 1.82 |
| LP(1)O2      | BD*(1)Si1-C4  | 5    |
| LP(1)O2      | BD*(1)Si1-C20 | 3.87 |
| LP(1)O2      | BD*(1)Si3-C16 | 4.55 |
| LP(1)O2      | BD*(1)Si3-C23 | 4.63 |
| LP(2)O2      | RY*(1)Si1     | 1.93 |
| LP(2)O2      | RY*(1)Si3     | 1.85 |
| LP(2)O2      | BD*(1)Si1-C12 | 7.18 |
| LP(2)O2      | BD*(1)Si1-C20 | 3.2  |
| LP(2)O2      | BD*(1)Si3-C8  | 7.38 |
| LP(2)O2      | BD*(1)Si3-C23 | 2.37 |
| LP(1)N38     | BD*(1)C35-H36 | 6.91 |
| BD(1)Si1-C12 | BD*(1)Si1-O2  | 2.71 |
| LP(1)N41     | BD*(1)C29-H31 | 6.9  |
| BD(1)Si1-C20 | BD*(1)Si1-O2  | 3.34 |
| BD(1)Si1-C20 | BD*(1)C32-C35 | 3.48 |
| BD(1)O2-Si3  | RY*(7)Si1     | 1.76 |
| BD(1)O2-Si3  | BD*(1)Si1-O2  | 1.84 |
| BD(1)Si1-O2  | BD*(1)O2-Si3  | 1.83 |
| BD(1)Si3-C8  | BD*(1)O2-Si3  | 2.67 |
| BD(1)Si3-C16 | BD*(1)O2-Si3  | 2.29 |
| BD(1)Si3-C23 | BD*(1)O2-Si3  | 3.37 |
| BD(1)Si3-C23 | BD*(1)C26-C29 | 3.46 |
| BD(1)C4-H5   | BD*(1)Si1-O2  | 1.78 |
| BD(1)C8-H11  | BD*(1)O2-Si3  | 1.84 |

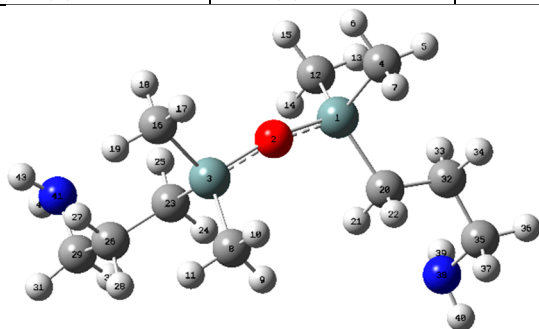

**Figure S6.** APTMDS – Atoms labels

**Table S14.** Wiberg bond order for CIMTMDS

| Vacuum      |            | Water       |            | Methanol    |            |
|-------------|------------|-------------|------------|-------------|------------|
| Bond        | bond order | Bond        | bond order | Bond        | bond order |
| 1(Si)-2(O)  | 1.1400146  | 1(Si)-2(O)  | 1.13655584 | 1(Si)-2(O)  | 1.13748427 |
| 1(Si)-12(C) | 0.95830373 | 1(Si)-12(C) | 0.95881853 | 1(Si)-12(C) | 0.95886238 |
| 1(Si)-16(C) | 0.96402099 | 1(Si)-16(C) | 0.96371834 | 1(Si)-16(C) | 0.96359277 |
| 1(Si)-20(C) | 0.90778637 | 1(Si)-20(C) | 0.90788235 | 1(Si)-20(C) | 0.90777761 |
| 1(Si)-21(H) | 0.05179981 | 1(Si)-21(H) | 0.05143908 | 1(Si)-21(H) | 0.05140356 |

|              |            |              |            |              |            |
|--------------|------------|--------------|------------|--------------|------------|
| 1(Si)-27(Cl) | 0.09508472 | 1(Si)-27(Cl) | 0.09144385 | 1(Si)-27(Cl) | 0.09156713 |
| 2(O)-3(Si)   | 1.14002035 | 2(O)-3(Si)   | 1.1365708  | 2(O)-3(Si)   | 1.13748612 |
| 3(Si)-4(C)   | 0.96402108 | 3(Si)-4(C)   | 0.96371619 | 3(Si)-4(C)   | 0.96359574 |
| 3(Si)-8(C)   | 0.95830266 | 3(Si)-8(C)   | 0.95881143 | 3(Si)-8(C)   | 0.95885699 |
| 3(Si)-23(C)  | 0.90778595 | 3(Si)-23(C)  | 0.90788642 | 3(Si)-23(C)  | 0.90777981 |
| 3(Si)-26(Cl) | 0.09508269 | 3(Si)-26(Cl) | 0.09145242 | 3(Si)-26(Cl) | 0.09156828 |
| 4(C)-5(H)    | 0.95861945 | 4(C)-5(H)    | 0.95940102 | 4(C)-5(H)    | 0.95958214 |
| 4(C)-6(H)    | 0.95852747 | 4(C)-6(H)    | 0.95854177 | 4(C)-6(H)    | 0.95866943 |
| 4(C)-7(H)    | 0.95875291 | 4(C)-7(H)    | 0.96044973 | 4(C)-7(H)    | 0.96042939 |
| 8(C)-9(H)    | 0.96169327 | 8(C)-9(H)    | 0.9609803  | 8(C)-9(H)    | 0.9610274  |
| 8(C)-10(H)   | 0.96125819 | 8(C)-10(H)   | 0.95932484 | 8(C)-10(H)   | 0.95946696 |
| 8(C)-11(H)   | 0.95875557 | 8(C)-11(H)   | 0.95904605 | 8(C)-11(H)   | 0.95908321 |
| 12(C)-13(H)  | 0.95875556 | 12(C)-13(H)  | 0.95904956 | 12(C)-13(H)  | 0.95908495 |
| 12(C)-14(H)  | 0.96169272 | 12(C)-14(H)  | 0.96097949 | 12(C)-14(H)  | 0.96102772 |
| 12(C)-15(H)  | 0.96125847 | 12(C)-15(H)  | 0.95932922 | 12(C)-15(H)  | 0.95946907 |
| 16(C)-17(H)  | 0.95875203 | 16(C)-17(H)  | 0.96044477 | 16(C)-17(H)  | 0.96042855 |
| 16(C)-18(H)  | 0.95861971 | 16(C)-18(H)  | 0.95939593 | 16(C)-18(H)  | 0.95958133 |
| 16(C)-19(H)  | 0.95852747 | 16(C)-19(H)  | 0.95853998 | 16(C)-19(H)  | 0.95866717 |
| 20(C)-21(H)  | 0.96372651 | 20(C)-21(H)  | 0.96347943 | 20(C)-21(H)  | 0.96354921 |
| 20(C)-22(H)  | 0.96374451 | 20(C)-22(H)  | 0.96391818 | 20(C)-22(H)  | 0.96389523 |
| 20(C)-27(Cl) | 1.212278   | 20(C)-27(Cl) | 1.19722847 | 20(C)-27(Cl) | 1.19767786 |
| 23(C)-24(H)  | 0.96372636 | 23(C)-24(H)  | 0.96348061 | 23(C)-24(H)  | 0.963549   |
| 23(C)-25(H)  | 0.96374434 | 23(C)-25(H)  | 0.96392041 | 23(C)-25(H)  | 0.96389584 |
| 23(C)-26(Cl) | 1.2122759  | 23(C)-26(Cl) | 1.19722131 | 23(C)-26(Cl) | 1.19767833 |

**Table S15.** Second Order Perturbation Theory Analysis of Fock Matrix in NBO Basis for:

*ClMTMDS – vacuum*

| Donor NBO(i) | Acceptor NBO(j) | E(2) |
|--------------|-----------------|------|
| BD(1)C16-H18 | BD*(1)Si1-C20   | 1.67 |
| BD(1)C16-H19 | BD*(1)Si1-O2    | 2.13 |
| CR(2)Si1     | BD*(1)Si1-O2    | 2.5  |
| CR(2)Si1     | BD*(1)O2-Si3    | 2.4  |
| CR(2)Si3     | BD*(1)Si1-O2    | 2.4  |
| CR(2)Si3     | BD*(1)O2-Si3    | 2.5  |
| CR(1)C20     | BD*(1)C20-Cl27  | 2.74 |
| CR(1)C23     | BD*(1)C23-Cl26  | 2.74 |
| LP(1)O2      | RY*(2)Si1       | 2.35 |
| LP(1)O2      | RY*(2)Si3       | 2.35 |
| LP(1)O2      | BD*(1)Si1-C12   | 3.33 |
| LP(1)O2      | BD*(1)Si1-C16   | 6.95 |
| LP(1)O2      | BD*(1)Si3-C4    | 6.95 |

|              |                |      |
|--------------|----------------|------|
| LP(1)O2      | BD*(1)Si3-C8   | 3.33 |
| LP(2)O2      | RY*(1)Si1      | 2    |
| LP(2)O2      | RY*(1)Si3      | 2    |
| LP(2)O2      | BD*(1)Si1-C12  | 3.16 |
| LP(2)O2      | BD*(1)Si1-C20  | 7.63 |
| LP(2)O2      | BD*(1)Si3-C8   | 3.16 |
| LP(2)O2      | BD*(1)Si3-C23  | 7.63 |
| LP(2)Cl26    | BD*(1)Si3-C23  | 1.95 |
| LP(2)Cl26    | BD*(1)C23-H25  | 1.57 |
| LP(3)Cl26    | BD*(1)C23-H24  | 3.52 |
| LP(3)Cl26    | BD*(1)C23-H25  | 2.75 |
| LP(2)Cl27    | BD*(1)Si1-C20  | 1.95 |
| BD(1)Si1-C12 | BD*(1)C20-Cl27 | 1.86 |
| LP(2)Cl27    | BD*(1)C20-H22  | 1.57 |
| LP(3)Cl27    | BD*(1)C20-H21  | 3.52 |
| LP(3)Cl27    | BD*(1)C20-H22  | 2.75 |
| BD(1)Si1-O2  | BD*(1)O2-Si3   | 2.02 |
| BD(1)Si1-C16 | BD*(1)Si1-O2   | 3.06 |
| BD(1)Si1-C20 | BD*(1)Si1-O2   | 2.66 |

|              |                |      |
|--------------|----------------|------|
| BD(1)Si1-C20 | BD*(1)Si1-C12  | 1.5  |
| BD(1)O2-Si3  | BD*(1)Si1-O2   | 2.02 |
| BD(1)Si3-C4  | BD*(1)O2-Si3   | 3.06 |
| BD(1)Si3-C8  | BD*(1)O2-Si3   | 2.42 |
| BD(1)Si3-C8  | BD*(1)C23-Cl26 | 1.86 |
| BD(1)Si3-C23 | BD*(1)O2-Si3   | 2.66 |
| BD(1)Si3-C23 | BD*(1)Si3-C8   | 1.5  |
| BD(1)Si1-C12 | BD*(1)Si1-O2   | 2.42 |
| BD(1)C4-H5   | BD*(1)Si3-C23  | 1.67 |
| BD(1)C4-H6   | BD*(1)O2-Si3   | 2.13 |
| BD(1)C4-H7   | BD*(1)Si3-C8   | 1.57 |
| BD(1)C8-H10  | BD*(1)O2-Si3   | 1.89 |
| BD(1)C12-H15 | BD*(1)Si1-O2   | 1.89 |
| BD(1)C16-H17 | BD*(1)Si1-C12  | 1.57 |

***ClMTMDS – water***

| Donor NBO(i) | Acceptor NBO(j) | E(2) |
|--------------|-----------------|------|
| BD(1)C8-H10  | BD*(1)O2-Si3    | 2.03 |
| BD(1)C12-H15 | BD*(1)Si1-O2    | 2.02 |
| BD(1)C16-H17 | BD*(1)Si1-C12   | 1.52 |
| BD(1)C16-H18 | BD*(1)Si1-C20   | 1.67 |
| BD(1)C16-H19 | BD*(1)Si1-O2    | 2.09 |
| BD(1)Si1-C12 | BD*(1)Si1-O2    | 2.77 |
| CR(2)Si1     | BD*(1)Si1-O2    | 2.52 |
| CR(2)Si1     | BD*(1)O2-Si3    | 2.33 |
| CR(2)Si3     | BD*(1)Si1-O2    | 2.33 |
| CR(2)Si3     | BD*(1)O2-Si3    | 2.52 |
| CR(1)C20     | BD*(1)C20-Cl27  | 2.86 |
| CR(1)C23     | BD*(1)C23-Cl26  | 2.86 |
| LP(1)O2      | BD*(1)Si1-C16   | 3.44 |
| LP(1)O2      | BD*(1)Si1-C20   | 6.29 |
| LP(1)O2      | BD*(1)Si3-C4    | 3.2  |
| LP(1)O2      | BD*(1)Si3-C23   | 6.38 |
| LP(2)O2      | RY*(2)Si1       | 1.52 |
| LP(2)O2      | RY*(2)Si3       | 1.6  |
| LP(2)O2      | BD*(1)Si1-C12   | 6.97 |
| LP(2)O2      | BD*(1)Si1-C16   | 4.04 |
| LP(2)O2      | BD*(1)Si3-C4    | 4.29 |
| LP(2)O2      | BD*(1)Si3-C8    | 6.83 |
| LP(2)Cl26    | BD*(1)Si3-C23   | 1.97 |
| LP(3)Cl26    | BD*(1)C23-H24   | 2.75 |
| LP(3)Cl26    | BD*(1)C23-H25   | 3.08 |
| LP(2)Cl27    | BD*(1)Si1-C20   | 1.97 |
| LP(3)Cl27    | BD*(1)C20-H21   | 2.75 |
| LP(3)Cl27    | BD*(1)C20-H22   | 3.08 |
| BD(1)Si1-C12 | BD*(1)C20-Cl27  | 1.99 |
| BD(1)Si1-C16 | BD*(1)Si1-O2    | 3.07 |

|              |                |      |
|--------------|----------------|------|
| BD(1)Si1-C20 | BD*(1)Si1-O2   | 2.37 |
| BD(1)O2-Si3  | BD*(1)Si1-O2   | 1.92 |
| BD(1)Si1-O2  | BD*(1)O2-Si3   | 1.92 |
| BD(1)Si3-C4  | BD*(1)O2-Si3   | 3.07 |
| BD(1)Si3-C8  | BD*(1)O2-Si3   | 2.77 |
| BD(1)Si3-C8  | BD*(1)C23-Cl26 | 1.99 |
| BD(1)Si3-C23 | BD*(1)O2-Si3   | 2.37 |
| BD(1)C4-H5   | BD*(1)Si3-C23  | 1.67 |
| BD(1)C4-H6   | BD*(1)O2-Si3   | 2.09 |
| BD(1)C4-H7   | BD*(1)Si3-C8   | 1.52 |

***ClMTMDS - methanol***

| Donor NBO(i) | Acceptor NBO(j) | E(2) |
|--------------|-----------------|------|
| BD(1)C8-H10  | BD*(1)O2-Si3    | 2.02 |
| BD(1)C12-H15 | BD*(1)Si1-O2    | 2.02 |
| BD(1)C16-H17 | BD*(1)Si1-C12   | 1.51 |
| BD(1)C16-H18 | BD*(1)Si1-C20   | 1.66 |
| BD(1)C16-H19 | BD*(1)Si1-O2    | 2.08 |
| BD(1)Si1-C12 | BD*(1)Si1-O2    | 2.74 |
| CR(2)Si1     | BD*(1)Si1-O2    | 2.51 |
| CR(2)Si1     | BD*(1)O2-Si3    | 2.36 |
| CR(2)Si3     | BD*(1)Si1-O2    | 2.36 |
| CR(2)Si3     | BD*(1)O2-Si3    | 2.51 |
| CR(1)C20     | BD*(1)C20-Cl27  | 2.86 |
| CR(1)C23     | BD*(1)C23-Cl26  | 2.86 |
| LP(1)O2      | BD*(1)Si1-C16   | 3.75 |
| LP(1)O2      | BD*(1)Si1-C20   | 6.33 |
| LP(1)O2      | BD*(1)Si3-C4    | 3.42 |
| LP(1)O2      | BD*(1)Si3-C23   | 6.48 |
| LP(2)O2      | RY*(2)Si1       | 1.59 |
| LP(2)O2      | RY*(2)Si3       | 1.69 |
| LP(2)O2      | BD*(1)Si1-C12   | 7.11 |
| LP(2)O2      | BD*(1)Si1-C16   | 3.74 |
| LP(2)O2      | BD*(1)Si3-C4    | 4.08 |
| LP(2)O2      | BD*(1)Si3-C8    | 6.93 |
| LP(2)Cl26    | BD*(1)Si3-C23   | 1.98 |
| LP(3)Cl26    | BD*(1)C23-H24   | 2.81 |
| LP(3)Cl26    | BD*(1)C23-H25   | 3.04 |
| LP(2)Cl27    | BD*(1)Si1-C20   | 1.98 |
| LP(3)Cl27    | BD*(1)C20-H21   | 2.81 |
| LP(3)Cl27    | BD*(1)C20-H22   | 3.04 |
| BD(1)Si1-C12 | BD*(1)C20-Cl27  | 1.98 |
| BD(1)Si1-C16 | BD*(1)Si1-O2    | 3.04 |
| BD(1)Si1-C20 | BD*(1)Si1-O2    | 2.39 |
| BD(1)O2-Si3  | BD*(1)Si1-O2    | 1.94 |
| BD(1)Si1-O2  | BD*(1)O2-Si3    | 1.94 |
| BD(1)Si3-C4  | BD*(1)O2-Si3    | 3.04 |



|              |                |      |
|--------------|----------------|------|
| BD(1)Si3-C8  | BD*(1)O2-Si3   | 2.74 |
| BD(1)Si3-C8  | BD*(1)C23-Cl26 | 1.98 |
| BD(1)Si3-C23 | BD*(1)O2-Si3   | 2.39 |

|            |               |      |
|------------|---------------|------|
| BD(1)C4-H5 | BD*(1)Si3-C23 | 1.66 |
| BD(1)C4-H6 | BD*(1)O2-Si3  | 2.08 |
| BD(1)C4-H7 | BD*(1)Si3-C8  | 1.51 |

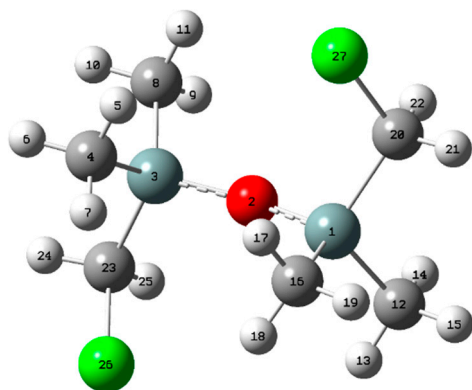

**Figure S7.** CIMTMDS – atoms labels

**Table S16.** Wiberg bond order for Silanol

| Vacuum      |            | Water       |            | Methanol    |            |
|-------------|------------|-------------|------------|-------------|------------|
| Bond        | bond order | Bond        | bond order | Bond        | bond order |
| 1(Si)-2(O)  | 1.16542152 | 1(Si)-2(O)  | 1.15468383 | 1(Si)-2(O)  | 1.15491916 |
| 1(Si)-3(C)  | 0.95443132 | 1(Si)-3(C)  | 0.95668923 | 1(Si)-3(C)  | 0.95664315 |
| 1(Si)-7(C)  | 0.95377317 | 1(Si)-7(C)  | 0.95471471 | 1(Si)-7(C)  | 0.95466418 |
| 1(Si)-11(C) | 0.91665407 | 1(Si)-11(C) | 0.91945161 | 1(Si)-11(C) | 0.91938253 |
| 1(Si)-13(H) | 0.05691297 | 1(Si)-13(H) | 0.05695471 | 1(Si)-13(H) | 0.05695933 |
| 1(Si)-14(N) | 0.07577149 | 1(Si)-14(N) | 0.07643425 | 1(Si)-14(N) | 0.07639908 |
| 1(Si)-25(H) | 0.06426339 | 1(Si)-25(H) | 0.06302769 | 1(Si)-25(H) | 0.06307128 |
| 2(O)-25(H)  | 1.18337529 | 2(O)-25(H)  | 1.1762816  | 2(O)-25(H)  | 1.17653584 |
| 3(C)-4(H)   | 0.96352698 | 3(C)-4(H)   | 0.96333756 | 3(C)-4(H)   | 0.96332925 |
| 3(C)-5(H)   | 0.95915636 | 3(C)-5(H)   | 0.95797135 | 3(C)-5(H)   | 0.95801613 |
| 3(C)-6(H)   | 0.95937338 | 3(C)-6(H)   | 0.95927442 | 3(C)-6(H)   | 0.95926615 |
| 7(C)-8(H)   | 0.96448739 | 7(C)-8(H)   | 0.96304921 | 7(C)-8(H)   | 0.96313301 |
| 7(C)-9(H)   | 0.96336984 | 7(C)-9(H)   | 0.96347758 | 7(C)-9(H)   | 0.9634713  |
| 7(C)-10(H)  | 0.9584978  | 7(C)-10(H)  | 0.9599632  | 7(C)-10(H)  | 0.9598965  |
| 11(C)-12(H) | 0.93823999 | 11(C)-12(H) | 0.93780518 | 11(C)-12(H) | 0.93782626 |
| 11(C)-13(H) | 0.94335095 | 11(C)-13(H) | 0.94286301 | 11(C)-13(H) | 0.94287588 |
| 11(C)-14(N) | 1.11323591 | 11(C)-14(N) | 1.11337591 | 11(C)-14(N) | 1.11337164 |
| 14(N)-15(H) | 1.02351643 | 14(N)-15(H) | 1.02179386 | 14(N)-15(H) | 1.02185857 |
| 14(N)-16(C) | 1.12178356 | 14(N)-16(C) | 1.11886063 | 14(N)-16(C) | 1.11896822 |
| 16(C)-17(H) | 0.92358195 | 16(C)-17(H) | 0.92487599 | 16(C)-17(H) | 0.92481042 |
| 16(C)-18(H) | 0.92200013 | 16(C)-18(H) | 0.92218378 | 16(C)-18(H) | 0.92218837 |
| 16(C)-19(C) | 1.03439816 | 16(C)-19(C) | 1.03613762 | 16(C)-19(C) | 1.03607642 |
| 19(C)-20(H) | 0.93192588 | 19(C)-20(H) | 0.93198719 | 19(C)-20(H) | 0.9320026  |
| 19(C)-21(H) | 0.93504953 | 19(C)-21(H) | 0.93628089 | 19(C)-21(H) | 0.93622903 |
| 19(C)-22(N) | 1.14129787 | 19(C)-22(N) | 1.13656204 | 19(C)-22(N) | 1.13671316 |
| 22(N)-23(H) | 1.04463288 | 22(N)-23(H) | 1.04230904 | 22(N)-23(H) | 1.04238023 |

|             |            |             |            |             |            |
|-------------|------------|-------------|------------|-------------|------------|
| 22(N)-24(H) | 1.04631796 | 22(N)-24(H) | 1.04418308 | 22(N)-24(H) | 1.04426126 |
|-------------|------------|-------------|------------|-------------|------------|

**Table S17.** Second Order Perturbation Theory Analysis of Fock Matrix in NBO Basis for:

*Silanol – vacuum*

| Donor NBO(i) | Acceptor NBO(j) | E(2) |
|--------------|-----------------|------|
| BD(1)Si1-C3  | BD*(1)Si1-C7    | 1.47 |
| LP(1)O2      | RY*(2)Si1       | 2.46 |
| LP(1)O2      | RY*(1)H25       | 1.85 |
| LP(1)O2      | BD*(1)Si1-C3    | 1.62 |
| BD(1)Si1-C3  | BD*(1)Si1-C11   | 1.31 |
| LP(1)O2      | BD*(1)Si1-C11   | 3.34 |
| LP(2)O2      | RY*(1)Si1       | 3.34 |
| LP(2)O2      | RY*(2)H25       | 1.95 |
| LP(2)O2      | BD*(1)Si1-C3    | 5.85 |
| LP(2)O2      | BD*(1)Si1-C7    | 6.76 |
| LP(1)N14     | RY*(2)H15       | 1.48 |
| LP(1)N14     | BD*(1)C11-H12   | 6.41 |
| LP(1)N14     | BD*(1)C16-H17   | 1.43 |
| LP(1)N14     | BD*(1)C16-H18   | 8.15 |
| LP(1)N22     | RY*(1)H23       | 1.37 |
| LP(1)N22     | BD*(1)C19-H20   | 7.89 |
| BD(1)Si1-C7  | BD*(1)Si1-O2    | 3.04 |
| BD(1)Si1-C7  | BD*(1)Si1-C3    | 1.46 |
| BD(1)Si1-C11 | RY*(1)N14       | 1.82 |
| BD(1)Si1-C11 | BD*(1)Si1-O2    | 2.24 |
| BD(1)Si1-C11 | BD*(1)N14-H15   | 2.19 |
| BD(1)O2-H25  | RY*(3)Si1       | 2.39 |
| BD(1)C3-H5   | BD*(1)Si1-C11   | 1.53 |
| BD(1)C3-H6   | BD*(1)Si1-O2    | 1.83 |
| BD(1)C7-H8   | BD*(1)Si1-C11   | 1.31 |
| BD(1)C7-H10  | BD*(1)Si1-O2    | 2.06 |
| BD(1)C11-H13 | BD*(1)Si1-C3    | 1.7  |
| BD(1)Si1-O2  | BD*(1)Si1-C11   | 1.61 |
| BD(1)C11-H13 | BD*(1)N14-C16   | 3.34 |
| BD(1)C11-N14 | BD*(1)C16-C19   | 1.84 |
| BD(1)N14-H15 | BD*(1)Si1-C11   | 1.82 |
| BD(1)N14-H15 | BD*(1)C16-H17   | 2.45 |
| BD(1)N14-C16 | RY*(1)C11       | 1.4  |
| BD(1)N14-C16 | BD*(1)C19-N22   | 1.58 |
| BD(1)C16-H17 | BD*(1)N14-H15   | 3.03 |
| BD(1)C16-H17 | BD*(1)C19-H20   | 2.69 |
| BD(1)C16-H18 | BD*(1)C19-H21   | 2.46 |

|              |               |      |
|--------------|---------------|------|
| BD(1)C16-C19 | BD*(1)C11-N14 | 3.19 |
| BD(1)C16-C19 | BD*(1)N22-H23 | 1.81 |
| BD(1)C19-H20 | BD*(1)C16-H17 | 2.51 |
| BD(1)C19-H21 | BD*(1)C16-H18 | 2.88 |
| BD(1)C19-H21 | BD*(1)N22-H24 | 2.99 |
| BD(1)C19-N22 | BD*(1)N14-C16 | 1.91 |
| BD(1)N22-H23 | BD*(1)C16-C19 | 2.62 |
| BD(1)N22-H24 | BD*(1)C19-H21 | 2.12 |
| CR(2)Si1     | BD*(1)Si1-O2  | 2.71 |
| BD(1)Si1-C3  | BD*(1)Si1-O2  | 3.19 |

*Silanol - water*

| Donor NBO(i) | Acceptor NBO(j) | E(2) |
|--------------|-----------------|------|
| BD(1)C7-H9   | BD*(1)Si1-C3    | 1.28 |
| BD(1)Si1-C3  | BD*(1)Si1-C7    | 1.45 |
| LP(1)O2      | RY*(2)Si1       | 2.68 |
| LP(1)O2      | RY*(1)H25       | 1.65 |
| LP(1)O2      | BD*(1)Si1-C3    | 1.49 |
| LP(1)O2      | BD*(1)Si1-C11   | 3.03 |
| BD(1)Si1-C3  | BD*(1)Si1-C11   | 1.33 |
| LP(2)O2      | RY*(1)Si1       | 3.28 |
| LP(2)O2      | RY*(2)H25       | 1.7  |
| LP(2)O2      | BD*(1)Si1-C3    | 5.76 |
| LP(2)O2      | BD*(1)Si1-C7    | 6.55 |
| LP(1)N14     | RY*(2)H15       | 1.37 |
| LP(1)N14     | BD*(1)C11-H12   | 6.43 |
| LP(1)N14     | BD*(1)C16-H17   | 1.37 |
| LP(1)N14     | BD*(1)C16-H18   | 7.72 |
| LP(1)N22     | BD*(1)C19-H20   | 7.23 |
| BD(1)Si1-C7  | BD*(1)Si1-O2    | 3.01 |
| BD(1)Si1-C7  | BD*(1)Si1-C3    | 1.43 |
| BD(1)Si1-C11 | RY*(1)N14       | 1.73 |
| BD(1)Si1-C11 | BD*(1)Si1-O2    | 2.49 |
| BD(1)Si1-C11 | BD*(1)N14-H15   | 2.12 |
| BD(1)O2-H25  | RY*(3)Si1       | 2.27 |
| BD(1)C3-H5   | BD*(1)Si1-C11   | 1.59 |
| BD(1)C3-H6   | BD*(1)Si1-O2    | 1.86 |
| BD(1)C7-H8   | BD*(1)Si1-C11   | 1.38 |
| BD(1)C7-H10  | BD*(1)Si1-O2    | 2.03 |
| BD(1)Si1-O2  | BD*(1)Si1-C11   | 1.62 |
| BD(1)C11-H13 | BD*(1)Si1-C3    | 1.71 |
| BD(1)C11-H13 | BD*(1)N14-C16   | 3.34 |
| BD(1)C11-N14 | BD*(1)C16-C19   | 1.85 |
| BD(1)N14-H15 | BD*(1)Si1-C11   | 1.93 |

|              |               |      |
|--------------|---------------|------|
| BD(1)N14-H15 | BD*(1)C16-H17 | 2.51 |
| BD(1)N14-C16 | RY*(1)C11     | 1.37 |
| BD(1)N14-C16 | BD*(1)C19-N22 | 1.6  |
| BD(1)C16-H17 | BD*(1)N14-H15 | 2.86 |
| BD(1)C16-H17 | BD*(1)C19-H20 | 2.6  |
| BD(1)C16-H18 | BD*(1)C19-H21 | 2.49 |
| BD(1)C16-C19 | BD*(1)C11-N14 | 3.13 |
| BD(1)C16-C19 | BD*(1)N22-H23 | 1.66 |
| BD(1)C19-H20 | BD*(1)C16-H17 | 2.58 |
| BD(1)C19-H21 | BD*(1)C16-H18 | 2.83 |
| BD(1)C19-H21 | BD*(1)N22-H24 | 2.77 |
| BD(1)C19-N22 | BD*(1)N14-C16 | 1.96 |
| BD(1)N22-H23 | BD*(1)C16-C19 | 2.69 |
| BD(1)N22-H24 | BD*(1)C19-H21 | 2.18 |
| CR(2)Si1     | BD*(1)Si1-O2  | 2.75 |
| BD(1)Si1-C3  | BD*(1)Si1-O2  | 3.13 |

**Silanol - methanol**

| Donor NBO(i) | Acceptor NBO(j) | E(2) |
|--------------|-----------------|------|
| BD(1)C7-H9   | BD*(1)Si1-C3    | 1.28 |
| BD(1)Si1-C3  | BD*(1)Si1-C7    | 1.45 |
| LP(1)O2      | RY*(2)Si1       | 2.67 |
| LP(1)O2      | RY*(1)H25       | 1.65 |
| LP(1)O2      | BD*(1)Si1-C3    | 1.5  |
| BD(1)Si1-C3  | BD*(1)Si1-C11   | 1.33 |
| LP(1)O2      | BD*(1)Si1-C11   | 3.04 |
| LP(2)O2      | RY*(1)Si1       | 3.28 |
| LP(2)O2      | RY*(2)H25       | 1.71 |
| LP(2)O2      | BD*(1)Si1-C3    | 5.74 |
| LP(2)O2      | BD*(1)Si1-C7    | 6.56 |
| LP(1)N14     | RY*(2)H15       | 1.38 |
| LP(1)N14     | BD*(1)C11-H12   | 6.43 |
| LP(1)N14     | BD*(1)C16-H17   | 1.37 |
| LP(1)N14     | BD*(1)C16-H18   | 7.73 |

|              |               |      |
|--------------|---------------|------|
| LP(1)N22     | BD*(1)C19-H20 | 7.25 |
| BD(1)Si1-C7  | BD*(1)Si1-O2  | 3.01 |
| BD(1)Si1-C7  | BD*(1)Si1-C3  | 1.43 |
| BD(1)Si1-C11 | RY*(1)N14     | 1.73 |
| BD(1)Si1-C11 | BD*(1)Si1-O2  | 2.48 |
| BD(1)Si1-C11 | BD*(1)N14-H15 | 2.12 |
| BD(1)O2-H25  | RY*(3)Si1     | 2.27 |
| BD(1)C3-H5   | BD*(1)Si1-C11 | 1.59 |
| BD(1)C3-H6   | BD*(1)Si1-O2  | 1.86 |
| BD(1)C7-H8   | BD*(1)Si1-C11 | 1.38 |
| BD(1)C7-H10  | BD*(1)Si1-O2  | 2.03 |
| BD(1)Si1-O2  | BD*(1)Si1-C11 | 1.62 |
| BD(1)C11-H13 | BD*(1)Si1-C3  | 1.71 |
| BD(1)C11-H13 | BD*(1)N14-C16 | 3.34 |
| BD(1)C11-N14 | BD*(1)C16-C19 | 1.85 |
| BD(1)N14-H15 | BD*(1)Si1-C11 | 1.93 |
| BD(1)N14-H15 | BD*(1)C16-H17 | 2.51 |
| BD(1)N14-C16 | RY*(1)C11     | 1.37 |
| BD(1)N14-C16 | BD*(1)C19-N22 | 1.6  |
| BD(1)C16-H17 | BD*(1)N14-H15 | 2.86 |
| BD(1)C16-H17 | BD*(1)C19-H20 | 2.61 |
| BD(1)C16-H18 | BD*(1)C19-H21 | 2.49 |
| BD(1)C16-C19 | BD*(1)C11-N14 | 3.13 |
| BD(1)C16-C19 | BD*(1)N22-H23 | 1.66 |
| BD(1)C19-H20 | BD*(1)C16-H17 | 2.58 |
| BD(1)C19-H21 | BD*(1)C16-H18 | 2.83 |
| BD(1)C19-H21 | BD*(1)N22-H24 | 2.78 |
| BD(1)C19-N22 | BD*(1)N14-C16 | 1.96 |
| BD(1)N22-H23 | BD*(1)C16-C19 | 2.69 |
| BD(1)N22-H24 | BD*(1)C19-H21 | 2.18 |
| CR(2)Si1     | BD*(1)Si1-O2  | 2.75 |
| BD(1)Si1-C3  | BD*(1)Si1-O2  | 3.13 |

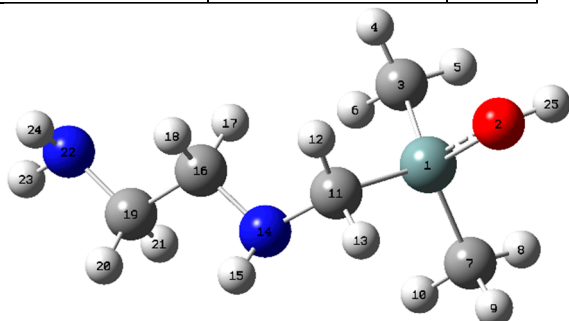

**Figure S8.** Silanol – atoms labels

**Table S18.** Wiberg bond order for H-Silanol

| Vacuum | Water | Methanol |
|--------|-------|----------|
|--------|-------|----------|

| Bond        | bond order | Bond        | bond order | Bond        | bond order |
|-------------|------------|-------------|------------|-------------|------------|
| 1(Si)-2(O)  | 1.22197541 | 1(Si)-2(O)  | 1.18001643 | 1(Si)-2(O)  | 1.181631   |
| 1(Si)-3(C)  | 0.98428817 | 1(Si)-3(C)  | 0.97751099 | 1(Si)-3(C)  | 0.97795759 |
| 1(Si)-7(C)  | 0.96628469 | 1(Si)-7(C)  | 0.97254643 | 1(Si)-7(C)  | 0.97238366 |
| 1(Si)-11(C) | 0.85265559 | 1(Si)-11(C) | 0.86848576 | 1(Si)-11(C) | 0.8675374  |
| 1(Si)-25(H) | 0.06312142 | 1(Si)-25(H) | 0.06328369 | 1(Si)-25(H) | 0.06334039 |
| 2(O)-25(H)  | 1.15962802 | 2(O)-25(H)  | 1.16625792 | 2(O)-25(H)  | 1.16621663 |
| 3(C)-4(H)   | 0.95581243 | 3(C)-4(H)   | 0.95842974 | 3(C)-4(H)   | 0.95829358 |
| 3(C)-5(H)   | 0.95040526 | 3(C)-5(H)   | 0.95465869 | 3(C)-5(H)   | 0.95436943 |
| 3(C)-6(H)   | 0.95327891 | 3(C)-6(H)   | 0.95606049 | 3(C)-6(H)   | 0.95595071 |
| 7(C)-8(H)   | 0.94745229 | 7(C)-8(H)   | 0.95519654 | 7(C)-8(H)   | 0.95501097 |
| 7(C)-9(H)   | 0.95839002 | 7(C)-9(H)   | 0.95873793 | 7(C)-9(H)   | 0.95880014 |
| 7(C)-10(H)  | 0.95779494 | 7(C)-10(H)  | 0.95644976 | 7(C)-10(H)  | 0.95644059 |
| 11(C)-12(H) | 0.94940658 | 11(C)-12(H) | 0.94619146 | 11(C)-12(H) | 0.94633902 |
| 11(C)-13(H) | 0.94256187 | 11(C)-13(H) | 0.94131798 | 11(C)-13(H) | 0.94151697 |
| 11(C)-14(N) | 1.00274458 | 11(C)-14(N) | 1.00540466 | 11(C)-14(N) | 1.00517199 |
| 14(N)-15(H) | 0.94635423 | 14(N)-15(H) | 0.93845831 | 14(N)-15(H) | 0.93878058 |
| 14(N)-16(C) | 0.98531098 | 14(N)-16(C) | 0.99253276 | 14(N)-16(C) | 0.99227986 |
| 14(N)-26(H) | 0.94555165 | 14(N)-26(H) | 0.94204714 | 14(N)-26(H) | 0.94222407 |
| 16(C)-17(H) | 0.92374402 | 16(C)-17(H) | 0.92443926 | 16(C)-17(H) | 0.9243407  |
| 16(C)-18(H) | 0.92873112 | 16(C)-18(H) | 0.92813208 | 16(C)-18(H) | 0.92819867 |
| 16(C)-19(C) | 1.03234306 | 16(C)-19(C) | 1.03574828 | 16(C)-19(C) | 1.03561754 |
| 19(C)-20(H) | 0.92872738 | 19(C)-20(H) | 0.92985573 | 19(C)-20(H) | 0.92986323 |
| 19(C)-21(H) | 0.93249322 | 19(C)-21(H) | 0.93253662 | 19(C)-21(H) | 0.93250682 |
| 19(C)-22(N) | 1.15735513 | 19(C)-22(N) | 1.14313727 | 19(C)-22(N) | 1.14368423 |
| 22(N)-23(H) | 1.03324487 | 22(N)-23(H) | 1.03661627 | 22(N)-23(H) | 1.03647469 |
| 22(N)-24(H) | 1.03836274 | 22(N)-24(H) | 1.04032272 | 22(N)-24(H) | 1.04028864 |

**Table S19.** Second Order Perturbation Theory Analysis of Fock Matrix in NBO Basis for:

*H-silanol - vacuum*

| Donor NBO(i) | Acceptor NBO(j) | E(2) |
|--------------|-----------------|------|
| BD(1)N14-H26 | BD*(1)C11-H12   | 1.32 |
| BD(1)N14-H26 | BD*(1)C16-H18   | 1.39 |
| BD(1)Si1-C3  | BD*(1)Si1-O2    | 3.16 |
| LP(1)O2      | RY*(2)Si1       | 2.75 |
| LP(1)O2      | RY*(1)H25       | 1.93 |
| LP(1)O2      | BD*(1)Si1-C3    | 3.88 |
| LP(1)O2      | BD*(1)Si1-C11   | 3.88 |
| LP(2)O2      | RY*(1)Si1       | 3.89 |
| BD(1)Si1-C3  | BD*(1)Si1-C11   | 1.59 |
| LP(2)O2      | RY*(2)H25       | 1.68 |
| LP(2)O2      | BD*(1)Si1-C3    | 3.35 |

|              |               |      |
|--------------|---------------|------|
| LP(2)O2      | BD*(1)Si1-C7  | 9.25 |
| LP(2)O2      | BD*(1)Si1-C11 | 1.42 |
| LP(1)N22     | RY*(1)H23     | 1.43 |
| LP(1)N22     | BD*(1)N14-C16 | 1.7  |
| LP(1)N22     | BD*(1)C16-C19 | 3.1  |
| LP(1)N22     | BD*(1)C19-H20 | 7.11 |
| BD(1)Si1-C7  | BD*(1)Si1-O2  | 2.3  |
| BD(1)Si1-C7  | BD*(1)Si1-C11 | 2.08 |
| BD(1)Si1-C11 | BD*(1)Si1-O2  | 2.06 |
| BD(1)Si1-C11 | BD*(1)Si1-C7  | 1.58 |
| BD(1)Si1-C11 | BD*(1)N14-H15 | 2.26 |
| BD(1)O2-H25  | RY*(3)Si1     | 2.34 |
| BD(1)C3-H4   | BD*(1)Si1-C7  | 1.64 |
| BD(1)C3-H5   | BD*(1)Si1-C11 | 2.02 |
| BD(1)C3-H6   | BD*(1)Si1-O2  | 2.18 |
| BD(1)C7-H8   | BD*(1)Si1-C11 | 1.71 |
| BD(1)C7-H9   | BD*(1)Si1-C3  | 1.41 |
| BD(1)C7-H10  | BD*(1)Si1-O2  | 1.99 |

|              |               |      |
|--------------|---------------|------|
| BD(1)C11-H12 | BD*(1)N14-H26 | 2.38 |
| BD(1)Si1-O2  | BD*(1)Si1-C11 | 1.55 |
| BD(1)C11-H13 | BD*(1)N14-C16 | 3.63 |
| BD(1)N14-H15 | BD*(1)Si1-C11 | 1.4  |
| BD(1)N14-H15 | BD*(1)C16-H17 | 1.44 |
| BD(1)C16-H17 | BD*(1)N14-H15 | 2.3  |
| BD(1)C16-H17 | BD*(1)C19-H20 | 2.26 |
| BD(1)C16-H18 | BD*(1)N14-H26 | 2.41 |
| BD(1)C16-H18 | BD*(1)C19-H21 | 2.17 |
| BD(1)C16-C19 | RY*(1)N22     | 1.45 |
| BD(1)C16-C19 | BD*(1)C11-N14 | 2.76 |
| BD(1)C16-C19 | BD*(1)N22-H23 | 1.5  |
| BD(1)C19-H20 | BD*(1)C16-H17 | 2.56 |
| BD(1)C19-H21 | BD*(1)C16-H18 | 2.77 |
| BD(1)C19-H21 | BD*(1)N22-H24 | 2.45 |
| BD(1)C19-N22 | BD*(1)N14-C16 | 2.99 |
| BD(1)N22-H23 | BD*(1)C16-C19 | 2.2  |
| BD(1)N22-H24 | RY*(2)C19     | 1.64 |
| BD(1)N22-H24 | BD*(1)C19-H21 | 1.84 |
| CR(2)Si1     | BD*(1)Si1-O2  | 2.5  |

***H-silanol - water***

| Donor NBO(i) | Acceptor NBO(j) | E(2) |
|--------------|-----------------|------|
| BD(1)Si1-C3  | BD*(1)Si1-C11   | 1.59 |
| LP(1)O2      | RY*(2)Si1       | 2.97 |
| LP(1)O2      | RY*(1)H25       | 1.74 |
| LP(1)O2      | BD*(1)Si1-C3    | 2.77 |
| LP(1)O2      | BD*(1)Si1-C7    | 2.45 |
| LP(2)O2      | RY*(1)Si1       | 3.31 |
| LP(2)O2      | RY*(2)H25       | 1.65 |
| LP(2)O2      | BD*(1)Si1-C7    | 4.69 |
| LP(2)O2      | BD*(1)Si1-C11   | 7.91 |
| LP(1)N22     | BD*(1)C16-C19   | 1.79 |
| LP(1)N22     | BD*(1)C19-H20   | 6.94 |
| BD(1)Si1-C7  | BD*(1)Si1-O2    | 2.79 |
| BD(1)Si1-C7  | BD*(1)Si1-C11   | 1.97 |
| BD(1)Si1-C11 | BD*(1)Si1-O2    | 3.38 |
| BD(1)Si1-C11 | BD*(1)Si1-C7    | 1.56 |
| BD(1)Si1-C11 | BD*(1)N14-H15   | 1.95 |
| BD(1)O2-H25  | RY*(3)Si1       | 2.3  |
| BD(1)C3-H4   | BD*(1)Si1-C7    | 1.62 |
| BD(1)C3-H5   | BD*(1)Si1-C11   | 1.87 |
| BD(1)C3-H6   | BD*(1)Si1-O2    | 1.66 |
| BD(1)C7-H8   | BD*(1)Si1-C11   | 1.71 |
| BD(1)C7-H9   | BD*(1)Si1-C3    | 1.53 |
| BD(1)C7-H10  | BD*(1)Si1-O2    | 2.13 |
| BD(1)C11-H12 | BD*(1)N14-H26   | 2.34 |

|              |               |      |
|--------------|---------------|------|
| BD(1)C11-H13 | BD*(1)N14-C16 | 3.65 |
| BD(1)C11-N14 | BD*(1)C16-C19 | 1.31 |
| BD(1)N14-H15 | BD*(1)Si1-C11 | 1.67 |
| BD(1)N14-H15 | BD*(1)C16-H17 | 1.54 |
| BD(1)N14-H26 | BD*(1)C11-H12 | 1.36 |
| BD(1)N14-H26 | BD*(1)C16-H18 | 1.41 |
| BD(1)C16-H17 | BD*(1)N14-H15 | 2.18 |
| BD(1)C16-H17 | BD*(1)C19-H20 | 2.26 |
| BD(1)C16-H18 | BD*(1)N14-H26 | 2.39 |
| BD(1)C16-H18 | BD*(1)C19-H21 | 2.19 |
| BD(1)C16-C19 | BD*(1)C11-N14 | 2.84 |
| BD(1)C16-C19 | BD*(1)N22-H23 | 1.59 |
| BD(1)C19-H20 | BD*(1)C16-H17 | 2.55 |
| BD(1)C19-H21 | BD*(1)C16-H18 | 2.73 |
| BD(1)C19-H21 | BD*(1)N22-H24 | 2.56 |
| BD(1)C19-N22 | BD*(1)N14-C16 | 2.83 |
| BD(1)N22-H23 | BD*(1)C16-C19 | 2.6  |
| BD(1)Si1-C3  | BD*(1)Si1-O2  | 1.96 |
| BD(1)N22-H24 | RY*(2)C19     | 1.75 |
| BD(1)N22-H24 | BD*(1)C19-H21 | 1.98 |
| CR(2)Si1     | BD*(1)Si1-O2  | 2.46 |

***H-silanol - methanol***

| Donor NBO(i) | Acceptor NBO(j) | E(2) |
|--------------|-----------------|------|
| BD(1)Si1-C3  | BD*(1)Si1-C11   | 1.6  |
| LP(1)O2      | RY*(2)Si1       | 2.97 |
| LP(1)O2      | RY*(1)H25       | 1.74 |
| LP(1)O2      | BD*(1)Si1-C3    | 2.77 |
| LP(1)O2      | BD*(1)Si1-C7    | 2.52 |
| LP(2)O2      | RY*(1)Si1       | 3.32 |
| LP(2)O2      | RY*(2)H25       | 1.65 |
| LP(2)O2      | BD*(1)Si1-C7    | 4.6  |
| LP(2)O2      | BD*(1)Si1-C11   | 8.01 |
| LP(1)N22     | BD*(1)C16-C19   | 1.83 |
| LP(1)N22     | BD*(1)C19-H20   | 6.97 |
| BD(1)Si1-C7  | BD*(1)Si1-O2    | 2.79 |
| BD(1)Si1-C7  | BD*(1)Si1-C11   | 1.98 |
| BD(1)Si1-C11 | BD*(1)Si1-O2    | 3.37 |
| BD(1)Si1-C11 | BD*(1)Si1-C7    | 1.56 |
| BD(1)Si1-C11 | BD*(1)N14-H15   | 1.96 |
| BD(1)O2-H25  | RY*(3)Si1       | 2.31 |
| BD(1)C3-H4   | BD*(1)Si1-C7    | 1.62 |
| BD(1)C3-H5   | BD*(1)Si1-C11   | 1.89 |
| BD(1)C3-H6   | BD*(1)Si1-O2    | 1.66 |
| BD(1)C7-H8   | BD*(1)Si1-C11   | 1.7  |
| BD(1)C7-H9   | BD*(1)Si1-C3    | 1.52 |
| BD(1)C7-H10  | BD*(1)Si1-O2    | 2.14 |

|              |               |      |
|--------------|---------------|------|
| BD(1)C11-H12 | BD*(1)N14-H26 | 2.34 |
| BD(1)C11-H13 | BD*(1)N14-C16 | 3.65 |
| BD(1)C11-N14 | BD*(1)C16-C19 | 1.3  |
| BD(1)N14-H15 | BD*(1)Si1-C11 | 1.65 |
| BD(1)N14-H15 | BD*(1)C16-H17 | 1.54 |
| BD(1)N14-H26 | BD*(1)C11-H12 | 1.35 |
| BD(1)N14-H26 | BD*(1)C16-H18 | 1.41 |
| BD(1)C16-H17 | BD*(1)N14-H15 | 2.19 |
| BD(1)C16-H17 | BD*(1)C19-H20 | 2.26 |
| BD(1)C16-H18 | BD*(1)N14-H26 | 2.39 |
| BD(1)C16-H18 | BD*(1)C19-H21 | 2.19 |

|              |               |      |
|--------------|---------------|------|
| BD(1)C16-C19 | BD*(1)C11-N14 | 2.84 |
| BD(1)C16-C19 | BD*(1)N22-H23 | 1.59 |
| BD(1)C19-H20 | BD*(1)C16-H17 | 2.54 |
| BD(1)C19-H21 | BD*(1)C16-H18 | 2.73 |
| BD(1)C19-H21 | BD*(1)N22-H24 | 2.56 |
| BD(1)C19-N22 | BD*(1)N14-C16 | 2.84 |
| BD(1)Si1-C3  | BD*(1)Si1-O2  | 1.94 |
| BD(1)N22-H23 | BD*(1)C16-C19 | 2.59 |
| BD(1)N22-H24 | RY*(2)C19     | 1.76 |
| BD(1)N22-H24 | BD*(1)C19-H21 | 1.98 |
| CR(2)Si1     | BD*(1)Si1-O2  | 2.46 |

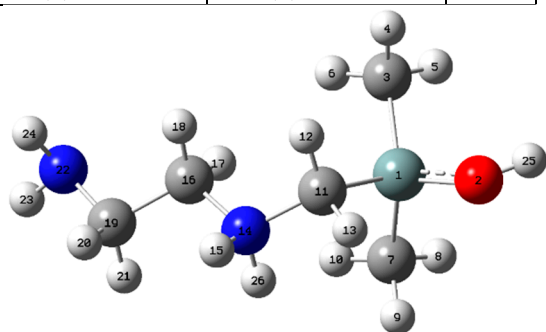

**Figure S9.** H-silanol – atoms labels

**Table S20.** Wiberg bond order for SB-Silanol

| Vacuum      |            | Water       |            | Methanol    |            |
|-------------|------------|-------------|------------|-------------|------------|
| Bond        | bond order | Bond        | bond order | Bond        | bond order |
| 1(Si)-2(O)  | 1.16694022 | 1(Si)-2(O)  | 1.15489924 | 1(Si)-2(O)  | 1.15524189 |
| 1(Si)-3(C)  | 0.95371994 | 1(Si)-3(C)  | 0.95689588 | 1(Si)-3(C)  | 0.95678904 |
| 1(Si)-7(C)  | 0.95391811 | 1(Si)-7(C)  | 0.95528676 | 1(Si)-7(C)  | 0.95526087 |
| 1(Si)-11(C) | 0.91642559 | 1(Si)-11(C) | 0.91888869 | 1(Si)-11(C) | 0.9188322  |
| 1(Si)-13(H) | 0.05652049 | 1(Si)-13(H) | 0.05692933 | 1(Si)-13(H) | 0.05693229 |
| 1(Si)-14(N) | 0.07765552 | 1(Si)-14(N) | 0.07530103 | 1(Si)-14(N) | 0.07529211 |
| 2(O)-23(H)  | 1.1829781  | 2(O)-23(H)  | 1.17606529 | 2(O)-23(H)  | 1.1763087  |
| 3(C)-4(H)   | 0.96357784 | 3(C)-4(H)   | 0.96330324 | 3(C)-4(H)   | 0.96330527 |
| 3(C)-5(H)   | 0.95908621 | 3(C)-5(H)   | 0.95782882 | 3(C)-5(H)   | 0.95788405 |
| 3(C)-6(H)   | 0.95989837 | 3(C)-6(H)   | 0.9593161  | 3(C)-6(H)   | 0.95932717 |
| 7(C)-8(H)   | 0.96422283 | 7(C)-8(H)   | 0.96278427 | 7(C)-8(H)   | 0.96285994 |
| 7(C)-9(H)   | 0.96333271 | 7(C)-9(H)   | 0.96337433 | 7(C)-9(H)   | 0.96335997 |
| 7(C)-10(H)  | 0.9585505  | 7(C)-10(H)  | 0.96004558 | 7(C)-10(H)  | 0.95997624 |
| 11(C)-12(H) | 0.93874693 | 11(C)-12(H) | 0.93810819 | 11(C)-12(H) | 0.93810207 |
| 11(C)-13(H) | 0.94346028 | 11(C)-13(H) | 0.942539   | 11(C)-13(H) | 0.94254349 |
| 11(C)-14(N) | 1.11009882 | 11(C)-14(N) | 1.11184942 | 11(C)-14(N) | 1.11190026 |
| 14(N)-15(H) | 1.02382033 | 14(N)-15(H) | 1.02136282 | 14(N)-15(H) | 1.02141735 |
| 14(N)-16(C) | 1.12209626 | 14(N)-16(C) | 1.12078598 | 14(N)-16(C) | 1.12086365 |
| 16(C)-19(C) | 1.02084728 | 16(C)-17(H) | 0.92551404 | 16(C)-17(H) | 0.92549294 |
| 19(C)-20(H) | 0.92084042 | 16(C)-18(H) | 0.924039   | 16(C)-18(H) | 0.92403009 |
| 19(C)-21(H) | 0.92059746 | 16(C)-19(C) | 1.02220371 | 16(C)-19(C) | 1.02216287 |

|             |            |             |            |             |            |
|-------------|------------|-------------|------------|-------------|------------|
| 19(C)-22(N) | 1.14378292 | 19(C)-20(H) | 0.92064346 | 19(C)-20(H) | 0.92064753 |
| 19(C)-24(C) | 0.13107594 | 19(C)-21(H) | 0.92075514 | 19(C)-21(H) | 0.92073643 |
| 22(N)-24(C) | 2.04302307 | 19(C)-22(N) | 1.14144326 | 19(C)-22(N) | 1.14152429 |
| 24(C)-25(H) | 0.90895511 | 22(N)-24(C) | 2.03943305 | 22(N)-24(C) | 2.03959325 |
| 24(C)-26(C) | 1.09372838 | 24(C)-26(C) | 1.09854466 | 24(C)-25(H) | 0.90884686 |
| 26(C)-27(C) | 1.40600875 | 26(C)-27(C) | 1.39950214 | 24(C)-26(C) | 1.09835775 |
| 26(C)-28(C) | 1.30668036 | 26(C)-28(C) | 1.31123059 | 26(C)-27(C) | 1.39978711 |
| 27(C)-29(C) | 1.43064223 | 27(C)-29(C) | 1.43751209 | 26(C)-28(C) | 1.31106653 |
| 27(C)-30(H) | 0.91151551 | 27(C)-30(H) | 0.91283531 | 27(C)-29(C) | 1.43718052 |
| 27(C)-32(C) | 0.10870605 | 28(C)-31(C) | 1.29495104 | 27(C)-30(H) | 0.9127805  |
| 28(C)-31(C) | 1.29429921 | 28(C)-32(C) | 0.09897199 | 28(C)-31(C) | 1.29491537 |
| 28(C)-35(O) | 1.44587412 | 28(C)-35(O) | 1.43528358 | 28(C)-35(O) | 1.43561554 |
| 29(C)-32(C) | 1.47180623 | 29(C)-32(C) | 1.46792741 | 29(C)-32(C) | 1.46817832 |
| 29(C)-33(H) | 0.9232673  | 29(C)-33(H) | 0.92112485 | 29(C)-33(H) | 0.92119037 |
| 31(C)-32(C) | 1.37068447 | 31(C)-32(C) | 1.3708791  | 31(C)-32(C) | 1.37078831 |
| 31(C)-37(C) | 1.09381509 | 31(C)-37(C) | 1.09834571 | 31(C)-37(C) | 1.09830063 |
| 32(C)-34(H) | 0.9084927  | 32(C)-34(H) | 0.90615071 | 32(C)-34(H) | 0.90622836 |
| 35(O)-36(H) | 1.03688856 | 35(O)-36(H) | 1.0369953  | 35(O)-36(H) | 1.03699826 |
| 37(C)-38(O) | 1.44713321 | 37(C)-38(O) | 1.47217672 | 37(C)-38(O) | 1.47130621 |
| 37(C)-40(O) | 2.18533942 | 37(C)-40(O) | 2.15053556 | 37(C)-40(O) | 2.1515904  |
| 38(O)-39(H) | 1.12038491 | 38(O)-39(H) | 1.10650327 | 38(O)-39(H) | 1.10698243 |

**Table S21.** Second Order Perturbation Theory Analysis of Fock Matrix in NBO Basis for:

***SB-Silanol - vacuum***

| Donor NBO(i) | Acceptor NBO(j) | E(2)  |
|--------------|-----------------|-------|
| BD(1)C26-C27 | BD*(1)C24-C26   | 3.16  |
| BD(1)C26-C27 | BD*(1)C26-C28   | 3.9   |
| BD(1)C26-C27 | BD*(1)C27-C29   | 3.1   |
| BD(1)C26-C27 | BD*(1)C28-O35   | 3.1   |
| BD(2)C26-C27 | BD*(2)N22-C24   | 14.53 |
| BD(2)C26-C27 | BD*(2)C28-C31   | 27.22 |
| BD(2)C26-C27 | BD*(2)C29-C32   | 17.25 |
| BD(1)C26-C28 | BD*(1)C26-C27   | 3.97  |
| BD(1)C26-C28 | BD*(1)C28-C31   | 4     |
| BD(1)C27-C29 | BD*(1)C24-C26   | 3.3   |
| BD(1)C27-C29 | BD*(1)C26-C27   | 3.28  |
| BD(1)C27-C29 | BD*(1)C29-C32   | 3.28  |
| BD(1)C27-H30 | BD*(1)C26-C28   | 5.15  |
| BD(1)C27-H30 | BD*(1)C29-C32   | 3.82  |
| BD(1)C28-C31 | BD*(1)C26-C28   | 4.13  |
| BD(1)C28-C31 | BD*(1)C31-C32   | 4.82  |
| BD(2)C28-C31 | BD*(2)C26-C27   | 13.33 |

|              |               |       |
|--------------|---------------|-------|
| BD(2)C28-C31 | BD*(2)C29-C32 | 24.7  |
| BD(2)C28-C31 | BD*(2)C37-O40 | 26.37 |
| BD(1)C29-C32 | BD*(1)C27-C29 | 3.11  |
| BD(1)C29-C32 | BD*(1)C31-C32 | 3.8   |
| BD(1)C29-C32 | BD*(1)C31-C37 | 3.48  |
| BD(2)C29-C32 | BD*(2)C26-C27 | 22.69 |
| BD(2)C29-C32 | BD*(2)C28-C31 | 15.17 |
| BD(1)C29-H33 | BD*(1)C26-C27 | 3.92  |
| BD(1)C29-H33 | BD*(1)C31-C32 | 4.45  |
| BD(1)C31-C32 | BD*(1)C28-C31 | 4.57  |
| BD(1)C31-C32 | BD*(1)C28-O35 | 3.48  |
| BD(1)C31-C32 | BD*(1)C29-C32 | 3.52  |
| BD(1)C32-H34 | BD*(1)C27-C29 | 3.72  |
| BD(1)C32-H34 | BD*(1)C28-C31 | 4.49  |
| BD(1)O35-H36 | BD*(1)C26-C28 | 5.29  |
| BD(1)O38-H39 | BD*(1)C37-O40 | 4.12  |
| CR(2)Si1     | LP*(1)Si1     | 5.13  |
| BD(1)C3-H6   | LP*(1)Si1     | 3.49  |
| CR(1)O40     | RY*(1)C37     | 6.22  |
| LP*(1)Si1    | RY*(3)Si1     | 5.35  |
| BD(1)C7-H10  | LP*(1)Si1     | 3.83  |
| LP(1)N14     | BD*(1)C11-H12 | 6.15  |
| LP(1)N14     | BD*(1)C16-H18 | 7.89  |
| LP(1)N22     | RY*(1)C24     | 5.43  |

|               |               |        |
|---------------|---------------|--------|
| LP(1)N22      | BD*(1)C19-H21 | 5.79   |
| LP(1)N22      | BD*(1)C24-H25 | 11.29  |
| LP(1)O35      | RY*(1)C28     | 3.81   |
| LP(1)O35      | BD*(1)C28-C31 | 7.64   |
| LP(2)O35      | BD*(2)C28-C31 | 40.17  |
| LP(1)O38      | BD*(1)C31-C37 | 6.07   |
| LP(2)O38      | BD*(2)C37-O40 | 43.29  |
| LP(1)O40      | RY*(1)C37     | 12.78  |
| LP(1)O40      | BD*(1)C31-C37 | 4.51   |
| BD(1)C11-H13  | BD*(1)N14-C16 | 3.24   |
| LP(1)O40      | BD*(1)O35-H36 | 4.27   |
| LP(2)O40      | BD*(1)C31-C37 | 12.23  |
| LP(2)O40      | BD*(1)O35-H36 | 19.93  |
| LP(2)O40      | BD*(1)C37-O38 | 28.55  |
| BD*(2)C28-C31 | BD*(2)C26-C27 | 123.99 |
| BD*(2)C28-C31 | BD*(2)C29-C32 | 216.92 |
| BD*(2)C29-C32 | RY*(3)C29     | 3.1    |
| BD*(2)C29-C32 | BD*(2)C26-C27 | 219.01 |
| BD(1)O2-H23   | LP*(1)Si1     | 26.29  |
| CR(1)O2       | LP*(1)Si1     | 17.56  |
| LP(1)O2       | LP*(1)Si1     | 23.11  |
| LP(1)O2       | BD*(1)Si1-C11 | 4.53   |
| LP(2)O2       | RY*(1)Si1     | 3.36   |
| LP(2)O2       | BD*(1)Si1-C3  | 6.3    |
| LP(2)O2       | BD*(1)Si1-C7  | 6.5    |
| LP(3)O2       | LP*(1)Si1     | 264.27 |
| LP(3)O2       | BD*(1)Si1-C11 | 5.78   |
| LP(3)O2       | BD*(1)O2-H23  | 3.21   |
| BD(1)C16-C19  | BD*(1)C11-N14 | 3.14   |
| BD(1)C19-H20  | BD*(2)N22-C24 | 3.56   |
| BD(1)C19-N22  | BD*(1)C24-C26 | 5      |
| BD(2)N22-C24  | BD*(1)C19-H20 | 3.7    |
| BD(2)N22-C24  | BD*(2)C26-C27 | 7.33   |
| BD(1)C24-H25  | BD*(1)C26-C27 | 3.77   |
| BD(1)C24-C26  | BD*(1)C19-N22 | 4.53   |
| BD(1)C24-C26  | BD*(1)C26-C27 | 3.27   |

**SB-Silanol - water**

| Donor NBO(i) | Acceptor NBO(j) | E(2)  |
|--------------|-----------------|-------|
| BD(1)C24-C26 | BD*(1)C26-C27   | 3.27  |
| BD(1)C24-C26 | BD*(1)C28-C31   | 3     |
| BD(1)C26-C27 | BD*(1)C24-C26   | 3.18  |
| BD(1)C26-C27 | BD*(1)C26-C28   | 3.96  |
| BD(1)C26-C27 | BD*(1)C27-C29   | 3.08  |
| BD(1)C26-C27 | BD*(1)C28-O35   | 3.15  |
| BD(2)C26-C27 | BD*(2)N22-C24   | 15.23 |
| BD(2)C26-C27 | BD*(2)C28-C31   | 27.27 |

|              |               |       |
|--------------|---------------|-------|
| BD(2)C26-C27 | BD*(2)C29-C32 | 16.28 |
| BD(1)C26-C28 | BD*(1)C26-C27 | 4.02  |
| BD(1)C26-C28 | BD*(1)C28-C31 | 4.01  |
| BD(1)C27-C29 | BD*(1)C24-C26 | 3.35  |
| BD(1)C27-C29 | BD*(1)C26-C27 | 3.28  |
| BD(1)C27-C29 | BD*(1)C29-C32 | 3.12  |
| BD(1)C27-H30 | BD*(1)C26-C28 | 5.1   |
| BD(1)C27-H30 | BD*(1)C29-C32 | 3.8   |
| BD(1)C28-C31 | BD*(1)C26-C28 | 4.14  |
| BD(1)C28-C31 | BD*(1)C31-C32 | 4.75  |
| BD(2)C28-C31 | BD*(2)C26-C27 | 13.5  |
| BD(2)C28-C31 | BD*(2)C29-C32 | 24.16 |
| BD(2)C28-C31 | BD*(2)C37-O40 | 27.84 |
| BD(1)C29-C32 | BD*(1)C27-C29 | 3.01  |
| BD(1)C29-C32 | BD*(1)C31-C32 | 3.59  |
| BD(1)C29-C32 | BD*(1)C31-C37 | 3.53  |
| BD(2)C29-C32 | BD*(2)C26-C27 | 24.24 |
| BD(2)C29-C32 | BD*(2)C28-C31 | 15.58 |
| BD(1)C29-H33 | BD*(1)C26-C27 | 4.05  |
| BD(1)C29-H33 | BD*(1)C31-C32 | 4.45  |
| BD(1)C31-C32 | BD*(1)C28-C31 | 4.58  |
| BD(1)C31-C32 | BD*(1)C28-O35 | 3.55  |
| BD(1)C31-C32 | BD*(1)C29-C32 | 3.3   |
| BD(1)C31-C37 | BD*(1)C31-C32 | 3     |
| BD(1)C32-H34 | BD*(1)C27-C29 | 3.8   |
| BD(1)C32-H34 | BD*(1)C28-C31 | 4.63  |
| BD(1)O35-H36 | BD*(1)C26-C28 | 5.25  |
| BD(1)O38-H39 | BD*(1)C37-O40 | 4.19  |
| CR(2)Si1     | LP*(1)Si1     | 5.08  |
| BD(1)C3-H6   | LP*(1)Si1     | 3.5   |
| CR(1)O35     | RY*(1)C28     | 3.02  |
| BD(1)C7-H10  | LP*(1)Si1     | 3.75  |
| CR(1)O40     | RY*(1)C37     | 6.01  |
| LP*(1)Si1    | RY*(3)Si1     | 5.08  |
| LP(1)N14     | BD*(1)C11-H12 | 6.4   |
| LP(1)N14     | BD*(1)C16-H18 | 7.69  |
| LP(1)N22     | RY*(1)C24     | 5.49  |
| LP(1)N22     | BD*(1)C19-H21 | 5.6   |
| LP(1)N22     | BD*(1)C24-H25 | 11.01 |
| LP(1)O35     | RY*(1)C28     | 3.84  |
| LP(1)O35     | BD*(1)C28-C31 | 7.46  |
| LP(2)O35     | BD*(2)C28-C31 | 38.86 |
| LP(1)O38     | RY*(2)C37     | 3.06  |
| LP(1)O38     | BD*(1)C31-C37 | 6.49  |
| LP(2)O38     | BD*(2)C37-O40 | 46.8  |
| LP(1)O40     | RY*(1)C37     | 12.65 |



|               |               |        |
|---------------|---------------|--------|
| LP(1)O40      | BD*(1)C31-C37 | 4.52   |
| LP(1)O40      | BD*(1)O35-H36 | 4.27   |
| LP(2)O40      | BD*(1)C31-C37 | 11.44  |
| LP(2)O40      | BD*(1)O35-H36 | 21.01  |
| BD(1)C11-H13  | BD*(1)N14-C16 | 3.36   |
| LP(2)O40      | BD*(1)C37-O38 | 26.84  |
| BD*(2)C28-C31 | BD*(2)C26-C27 | 137.15 |
| BD*(2)C28-C31 | BD*(2)C29-C32 | 148.83 |
| BD*(2)C37-O40 | BD*(2)C28-C31 | 140.21 |
| BD(1)O2-H23   | LP*(1)Si1     | 27.33  |
| CR(1)O2       | LP*(1)Si1     | 17.25  |
| LP(1)O2       | LP*(1)Si1     | 21.96  |
| LP(1)O2       | BD*(1)Si1-C11 | 4.12   |
| LP(2)O2       | RY*(1)Si1     | 3.3    |
| LP(2)O2       | BD*(1)Si1-C3  | 5.86   |
| LP(2)O2       | BD*(1)Si1-C7  | 6.55   |
| LP(3)O2       | LP*(1)Si1     | 260.17 |
| LP(3)O2       | BD*(1)Si1-C11 | 5.89   |
| LP(3)O2       | BD*(1)O2-H23  | 3.41   |
| BD(1)C16-C19  | BD*(1)C11-N14 | 3.1    |
| BD(1)C19-H20  | BD*(2)N22-C24 | 3.51   |
| BD(1)C19-N22  | BD*(1)C24-C26 | 5.08   |
| BD(2)N22-C24  | BD*(1)C19-H20 | 3.65   |
| BD(2)N22-C24  | BD*(2)C26-C27 | 7.08   |
| BD(1)C24-H25  | BD*(1)C26-C27 | 3.82   |
| BD(1)C24-C26  | BD*(1)C19-N22 | 4.44   |

**SB-Silanol - methanol**

| Donor NBO(i) | Acceptor NBO(j) | E(2)  |
|--------------|-----------------|-------|
| BD(1)C24-C26 | BD*(1)C26-C27   | 3.27  |
| BD(1)C24-C26 | BD*(1)C28-C31   | 3     |
| BD(1)C26-C27 | BD*(1)C24-C26   | 3.18  |
| BD(1)C26-C27 | BD*(1)C26-C28   | 3.96  |
| BD(1)C26-C27 | BD*(1)C27-C29   | 3.08  |
| BD(1)C26-C27 | BD*(1)C28-O35   | 3.15  |
| BD(2)C26-C27 | BD*(2)N22-C24   | 15.21 |
| BD(2)C26-C27 | BD*(2)C28-C31   | 27.28 |
| BD(2)C26-C27 | BD*(2)C29-C32   | 16.31 |
| BD(1)C26-C28 | BD*(1)C26-C27   | 4.01  |
| BD(1)C26-C28 | BD*(1)C28-C31   | 4.01  |
| BD(1)C27-C29 | BD*(1)C24-C26   | 3.35  |
| BD(1)C27-C29 | BD*(1)C26-C27   | 3.28  |
| BD(1)C27-C29 | BD*(1)C29-C32   | 3.12  |
| BD(1)C27-H30 | BD*(1)C26-C28   | 5.1   |
| BD(1)C27-H30 | BD*(1)C29-C32   | 3.8   |
| BD(1)C28-C31 | BD*(1)C26-C28   | 4.14  |
| BD(1)C28-C31 | BD*(1)C31-C32   | 4.76  |

|               |               |        |
|---------------|---------------|--------|
| BD(2)C28-C31  | BD*(2)C26-C27 | 13.49  |
| BD(2)C28-C31  | BD*(2)C29-C32 | 24.17  |
| BD(2)C28-C31  | BD*(2)C37-O40 | 27.81  |
| BD(1)C29-C32  | BD*(1)C27-C29 | 3.02   |
| BD(1)C29-C32  | BD*(1)C31-C32 | 3.6    |
| BD(1)C29-C32  | BD*(1)C31-C37 | 3.53   |
| BD(2)C29-C32  | BD*(2)C26-C27 | 24.18  |
| BD(2)C29-C32  | BD*(2)C28-C31 | 15.56  |
| BD(1)C29-H33  | BD*(1)C26-C27 | 4.04   |
| BD(1)C29-H33  | BD*(1)C31-C32 | 4.45   |
| BD(1)C31-C32  | BD*(1)C28-C31 | 4.58   |
| BD(1)C31-C32  | BD*(1)C28-O35 | 3.55   |
| BD(1)C31-C32  | BD*(1)C29-C32 | 3.3    |
| BD(1)C31-C37  | BD*(1)C31-C32 | 3      |
| BD(1)C32-H34  | BD*(1)C27-C29 | 3.79   |
| BD(1)C32-H34  | BD*(1)C28-C31 | 4.62   |
| BD(1)O35-H36  | BD*(1)C26-C28 | 5.25   |
| BD(1)O38-H39  | BD*(1)C37-O40 | 4.19   |
| CR(2)Si1      | LP*(1)Si1     | 5.08   |
| BD(1)C3-H6    | LP*(1)Si1     | 3.5    |
| CR(1)O35      | RY*(1)C28     | 3.02   |
| BD(1)C7-H10   | LP*(1)Si1     | 3.75   |
| CR(1)O40      | RY*(1)C37     | 6.01   |
| LP*(1)Si1     | RY*(3)Si1     | 5.09   |
| LP(1)N14      | BD*(1)C11-H12 | 6.4    |
| LP(1)N14      | BD*(1)C16-H18 | 7.7    |
| LP(1)N22      | RY*(1)C24     | 5.49   |
| LP(1)N22      | BD*(1)C19-H21 | 5.6    |
| LP(1)N22      | BD*(1)C24-H25 | 11.02  |
| LP(1)O35      | RY*(1)C28     | 3.84   |
| LP(1)O35      | BD*(1)C28-C31 | 7.47   |
| LP(2)O35      | BD*(2)C28-C31 | 38.9   |
| LP(1)O38      | RY*(2)C37     | 3.05   |
| LP(1)O38      | BD*(1)C31-C37 | 6.48   |
| LP(2)O38      | BD*(2)C37-O40 | 46.72  |
| LP(1)O40      | RY*(1)C37     | 12.65  |
| LP(1)O40      | BD*(1)C31-C37 | 4.52   |
| LP(1)O40      | BD*(1)O35-H36 | 4.27   |
| LP(2)O40      | BD*(1)C31-C37 | 11.46  |
| LP(2)O40      | BD*(1)O35-H36 | 20.98  |
| BD(1)C11-H13  | BD*(1)N14-C16 | 3.36   |
| LP(2)O40      | BD*(1)C37-O38 | 26.89  |
| BD*(2)C28-C31 | BD*(2)C26-C27 | 136.38 |
| BD*(2)C28-C31 | BD*(2)C29-C32 | 150.35 |
| BD*(2)C37-O40 | BD*(2)C28-C31 | 141.23 |
| BD(1)O2-H23   | LP*(1)Si1     | 27.29  |

|         |               |        |
|---------|---------------|--------|
| CR(1)O2 | LP*(1)Si1     | 17.27  |
| LP(1)O2 | LP*(1)Si1     | 21.99  |
| LP(1)O2 | BD*(1)Si1-C11 | 4.13   |
| LP(2)O2 | RY*(1)Si1     | 3.3    |
| LP(2)O2 | BD*(1)Si1-C3  | 5.86   |
| LP(2)O2 | BD*(1)Si1-C7  | 6.55   |
| LP(3)O2 | LP*(1)Si1     | 260.31 |
| LP(3)O2 | BD*(1)Si1-C11 | 5.88   |

|              |               |      |
|--------------|---------------|------|
| LP(3)O2      | BD*(1)O2-H23  | 3.4  |
| BD(1)C16-C19 | BD*(1)C11-N14 | 3.1  |
| BD(1)C19-H20 | BD*(2)N22-C24 | 3.51 |
| BD(1)C19-N22 | BD*(1)C24-C26 | 5.08 |
| BD(2)N22-C24 | BD*(1)C19-H20 | 3.65 |
| BD(2)N22-C24 | BD*(2)C26-C27 | 7.09 |
| BD(1)C24-H25 | BD*(1)C26-C27 | 3.82 |
| BD(1)C24-C26 | BD*(1)C19-N22 | 4.44 |

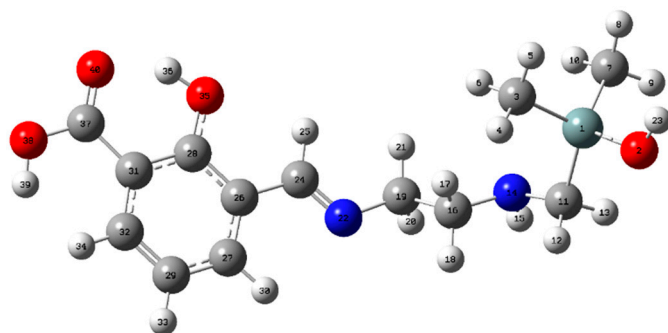

**Figure S10.** SB-Silanol – atoms labels

**Table S22.** Wiberg bond order for SB-H-Silanol

| Vacuum      |            | Water       |            | Methanol    |            |
|-------------|------------|-------------|------------|-------------|------------|
| Bond        | bond order | Bond        | bond order | Bond        | bond order |
| 1(Si)-11(C) | 0.85409934 | 1(Si)-2(O)  | 1.18106349 | 1(C)-2(C)   | 1.46286659 |
| 1(Si)-2(O)  | 1.22070301 | 1(Si)-3(C)  | 0.97312186 | 1(C)-6(C)   | 1.37513636 |
| 1(Si)-3(C)  | 0.98329413 | 1(Si)-7(C)  | 0.97159763 | 1(C)-38(H)  | 0.90606456 |
| 1(Si)-7(C)  | 0.96662316 | 1(Si)-11(C) | 0.874969   | 2(C)-3(C)   | 1.44217499 |
| 2(O)-23(H)  | 1.16005256 | 2(O)-23(H)  | 1.16542443 | 2(C)-37(H)  | 0.92078372 |
| 3(C)-4(H)   | 0.95590281 | 3(C)-4(H)   | 0.95949395 | 3(C)-4(C)   | 1.3934664  |
| 3(C)-5(H)   | 0.95091875 | 3(C)-5(H)   | 0.95341024 | 3(C)-36(H)  | 0.91289121 |
| 3(C)-6(H)   | 0.95366183 | 3(C)-6(H)   | 0.95493259 | 4(C)-5(C)   | 1.30828258 |
| 7(C)-10(H)  | 0.95782221 | 7(C)-8(H)   | 0.95428853 | 4(C)-7(C)   | 1.10565931 |
| 7(C)-8(H)   | 0.94747271 | 7(C)-9(H)   | 0.96015127 | 5(C)-6(C)   | 1.29318552 |
| 7(C)-9(H)   | 0.95823066 | 7(C)-10(H)  | 0.95688201 | 5(C)-15(O)  | 1.44093315 |
| 11(C)-12(H) | 0.94919571 | 11(C)-12(H) | 0.94511773 | 6(C)-16(C)  | 1.09571346 |
| 11(C)-13(H) | 0.94243719 | 11(C)-13(H) | 0.94075388 | 7(C)-8(N)   | 2.02335443 |
| 11(C)-14(N) | 1.0034048  | 11(C)-14(N) | 1.00747889 | 7(C)-35(H)  | 0.90847003 |
| 14(N)-15(H) | 0.94568111 | 14(N)-15(H) | 0.93801468 | 8(N)-9(C)   | 1.14415298 |
| 14(N)-16(C) | 0.98645362 | 14(N)-16(C) | 0.99448828 | 9(C)-10(C)  | 1.02788076 |
| 14(N)-41(H) | 0.9451119  | 14(N)-41(H) | 0.94146436 | 9(C)-32(H)  | 0.91913688 |
| 16(C)-17(H) | 0.92480472 | 16(C)-17(H) | 0.92449622 | 9(C)-33(H)  | 0.9184702  |
| 16(C)-18(H) | 0.9268517  | 16(C)-18(H) | 0.92755291 | 10(C)-11(N) | 0.99427303 |
| 16(C)-19(C) | 1.02909985 | 16(C)-19(C) | 1.02757029 | 10(C)-30(H) | 0.92452283 |
| 19(C)-20(H) | 0.91907936 | 19(C)-20(H) | 0.91945926 | 10(C)-31(H) | 0.92752419 |
| 19(C)-21(H) | 0.91601081 | 19(C)-21(H) | 0.91859749 | 11(N)-12(C) | 1.00719525 |
| 19(C)-22(N) | 1.16093977 | 19(C)-22(N) | 1.14367082 | 11(N)-29(H) | 0.9382314  |

|             |            |             |            |              |            |
|-------------|------------|-------------|------------|--------------|------------|
| 22(N)-24(C) | 1.98809784 | 22(N)-24(C) | 2.02389122 | 11(N)-41(H)  | 0.94162707 |
| 24(C)-25(H) | 0.90580208 | 24(C)-25(H) | 0.90841909 | 12(C)-13(Si) | 0.87425305 |
| 24(C)-26(C) | 1.12685551 | 24(C)-26(C) | 1.10540954 | 12(C)-27(H)  | 0.94525816 |
| 26(C)-27(C) | 1.3793229  | 26(C)-27(C) | 1.39381949 | 12(C)-28(H)  | 0.94079034 |
| 26(C)-28(C) | 1.29580328 | 26(C)-28(C) | 1.30842481 | 13(Si)-14(C) | 0.97148082 |
| 27(C)-29(C) | 1.45522674 | 27(C)-29(C) | 1.44181989 | 13(Si)-18(O) | 1.18234762 |
| 27(C)-30(H) | 0.91404191 | 27(C)-30(H) | 0.91288332 | 13(Si)-19(C) | 0.97348028 |
| 28(C)-31(C) | 1.28976997 | 28(C)-31(C) | 1.29326698 | 14(C)-24(H)  | 0.95387151 |
| 28(C)-35(O) | 1.46412067 | 28(C)-35(O) | 1.44042739 | 14(C)-25(H)  | 0.96003617 |
| 29(C)-32(C) | 1.44624734 | 29(C)-32(C) | 1.46333798 | 14(C)-26(H)  | 0.95706446 |
| 29(C)-33(H) | 0.92122559 | 29(C)-33(H) | 0.92075029 | 15(O)-39(H)  | 1.03398605 |
| 31(C)-32(C) | 1.39330992 | 31(C)-32(C) | 1.37456566 | 16(C)-17(O)  | 2.15106771 |
| 31(C)-37(C) | 1.07761516 | 31(C)-37(C) | 1.09637596 | 16(C)-20(O)  | 1.47461564 |
| 32(C)-34(H) | 0.90788674 | 32(C)-34(H) | 0.9059146  | 18(O)-34(H)  | 1.1652356  |
| 35(O)-36(H) | 1.01852786 | 35(O)-36(H) | 1.03414103 | 19(C)-21(H)  | 0.95922385 |
| 37(C)-38(O) | 1.47180887 | 37(C)-38(O) | 1.4747782  | 19(C)-22(H)  | 0.95356263 |
| 37(C)-40(O) | 2.17973784 | 37(C)-40(O) | 2.14984751 | 19(C)-23(H)  | 0.95486596 |
| 38(O)-39(H) | 1.11611837 | 38(O)-39(H) | 1.10613996 | 20(O)-40(H)  | 1.10644721 |

**Table S23.** Second Order Perturbation Theory Analysis of Fock Matrix in NBO Basis for:

***SB-H-Silanol - vacuum***

| Donor NBO(i) | Acceptor NBO(j) | E(2)  |
|--------------|-----------------|-------|
| BD(1)C24-C26 | BD*(1)C19-N22   | 4.69  |
| BD(1)C24-C26 | BD*(1)C26-C27   | 3.34  |
| BD(1)C26-C27 | BD*(1)C24-C26   | 3.36  |
| BD(1)C26-C27 | BD*(1)C26-C28   | 4.12  |
| BD(1)C26-C27 | BD*(1)C27-C29   | 3.06  |
| BD(2)C26-C27 | LP*(1)C28       | 66.25 |
| BD(2)C26-C27 | BD*(2)N22-C24   | 19.34 |
| BD(2)C26-C27 | BD*(2)C29-C32   | 15.85 |
| BD(1)C26-C28 | BD*(1)C26-C27   | 4.15  |
| BD(1)C26-C28 | BD*(1)C28-C31   | 3.84  |
| BD(1)C27-C29 | BD*(1)C24-C26   | 3.46  |
| BD(1)C27-C29 | BD*(1)C26-C27   | 3.28  |
| BD(1)C27-C29 | BD*(1)C29-C32   | 3.12  |
| BD(1)C27-H30 | BD*(1)C26-C28   | 5.04  |
| BD(1)C27-H30 | BD*(1)C29-C32   | 3.82  |
| BD(1)C28-C31 | BD*(1)C26-C28   | 4.04  |
| BD(1)C28-C31 | BD*(1)C31-C32   | 4.72  |
| BD(1)C29-C32 | BD*(1)C27-C29   | 3.02  |
| BD(1)C29-C32 | BD*(1)C31-C32   | 3.65  |
| BD(1)C29-C32 | BD*(1)C31-C37   | 3.53  |

|              |               |       |
|--------------|---------------|-------|
| BD(2)C29-C32 | LP(1)C31      | 44.96 |
| BD(2)C29-C32 | BD*(2)C26-C27 | 25.68 |
| BD(1)C29-H33 | BD*(1)C26-C27 | 4.05  |
| BD(1)C29-H33 | BD*(1)C31-C32 | 4.39  |
| BD(1)C31-C32 | BD*(1)C28-C31 | 4.51  |
| BD(1)C31-C32 | BD*(1)C28-O35 | 3.52  |
| BD(1)C31-C32 | BD*(1)C29-C32 | 3.34  |
| BD(1)C31-C37 | BD*(1)C31-C32 | 3.01  |
| BD(1)C32-H34 | BD*(1)C27-C29 | 3.73  |
| BD(1)C32-H34 | BD*(1)C28-C31 | 4.67  |
| BD(1)O35-H36 | BD*(1)C26-C28 | 5.56  |
| BD(2)C37-O40 | LP(1)C31      | 6.21  |
| BD(1)O38-H39 | BD*(1)C37-O40 | 4.25  |
| CR(2)Si1     | LP*(1)Si1     | 5.95  |
| BD(1)C3-H6   | LP*(1)Si1     | 3.99  |
| BD(1)C7-H10  | LP*(1)Si1     | 3.48  |
| CR(1)O35     | RY*(1)C28     | 3.12  |
| CR(1)O40     | RY*(1)C37     | 6.17  |
| LP*(1)Si1    | RY*(3)Si1     | 5.9   |
| LP*(1)Si1    | BD*(1)C11-N14 | 3.76  |
| LP(1)N22     | RY*(1)C24     | 5.27  |
| LP(1)N22     | BD*(1)C19-H21 | 6.34  |
| LP(1)N22     | BD*(1)C24-H25 | 10.18 |
| LP*(1)C28    | BD*(2)C26-C27 | 50.32 |
| LP(1)C31     | RY*(3)C32     | 3.25  |
| LP(1)C31     | BD*(2)C29-C32 | 71.44 |
| LP(1)C31     | BD*(2)C37-O40 | 67.89 |

|               |               |        |
|---------------|---------------|--------|
| BD(1)C11-H13  | BD*(1)N14-C16 | 3.62   |
| LP(1)O35      | RY*(1)C28     | 3.97   |
| LP(1)O35      | BD*(1)C28-C31 | 7.76   |
| LP(2)O35      | LP*(1)C28     | 77.33  |
| LP(1)O38      | BD*(1)C31-C37 | 6.51   |
| LP(2)O38      | BD*(2)C37-O40 | 46.34  |
| LP(1)O40      | RY*(1)C37     | 12.18  |
| LP(1)O40      | BD*(1)C31-C37 | 4.75   |
| LP(1)O40      | BD*(1)O35-H36 | 5.06   |
| LP(2)O40      | BD*(1)C31-C37 | 12.02  |
| LP(2)O40      | BD*(1)O35-H36 | 23.88  |
| LP(2)O40      | BD*(1)C37-O38 | 27.6   |
| BD*(2)N22-C24 | BD*(2)C26-C27 | 92.23  |
| BD*(2)C29-C32 | RY*(3)C29     | 3      |
| BD(1)O2-H23   | LP*(1)Si1     | 29.63  |
| CR(1)O2       | LP*(1)Si1     | 18.83  |
| LP(1)O2       | LP*(1)Si1     | 24.34  |
| LP(1)O2       | BD*(1)Si1-C11 | 4.96   |
| LP(2)O2       | RY*(1)Si1     | 3.91   |
| LP(2)O2       | BD*(1)Si1-C3  | 3.62   |
| LP(2)O2       | BD*(1)Si1-C7  | 9.12   |
| LP(3)O2       | LP*(1)Si1     | 287.31 |
| LP(3)O2       | RY*(3)Si1     | 3.17   |
| LP(3)O2       | BD*(1)Si1-C11 | 6.53   |
| LP(3)O2       | BD*(1)O2-H23  | 4.64   |
| BD(1)C19-N22  | BD*(1)C24-C26 | 4.56   |
| BD(2)N22-C24  | BD*(1)C19-H20 | 4.6    |
| BD(2)N22-C24  | BD*(2)C26-C27 | 6      |
| BD(1)C24-H25  | BD*(1)C26-C27 | 3.94   |

***SB-H-Silanol - water***

| Donor NBO(i) | Acceptor NBO(j) | E(2)  |
|--------------|-----------------|-------|
| BD(1)C24-C26 | BD*(1)C19-N22   | 4.56  |
| BD(1)C24-C26 | BD*(1)C26-C27   | 3.28  |
| BD(1)C26-C27 | BD*(1)C24-C26   | 3.21  |
| BD(1)C26-C27 | BD*(1)C26-C28   | 4.02  |
| BD(1)C26-C27 | BD*(1)C27-C29   | 3.05  |
| BD(1)C26-C27 | BD*(1)C28-O35   | 3.11  |
| BD(2)C26-C27 | BD*(2)N22-C24   | 16.44 |
| BD(2)C26-C27 | BD*(2)C28-C31   | 27.46 |
| BD(2)C26-C27 | BD*(2)C29-C32   | 15.93 |
| BD(1)C26-C28 | BD*(1)C26-C27   | 4.07  |
| BD(1)C26-C28 | BD*(1)C28-C31   | 3.96  |
| BD(1)C27-C29 | BD*(1)C24-C26   | 3.39  |
| BD(1)C27-C29 | BD*(1)C26-C27   | 3.26  |
| BD(1)C27-C29 | BD*(1)C29-C32   | 3.09  |
| BD(1)C27-H30 | BD*(1)C26-C28   | 5.09  |

|               |               |        |
|---------------|---------------|--------|
| BD(1)C27-H30  | BD*(1)C29-C32 | 3.81   |
| BD(1)C28-C31  | BD*(1)C26-C28 | 4.11   |
| BD(1)C28-C31  | BD*(1)C31-C32 | 4.74   |
| BD(2)C28-C31  | BD*(2)C26-C27 | 13.42  |
| BD(2)C28-C31  | BD*(2)C29-C32 | 24.43  |
| BD(2)C28-C31  | BD*(2)C37-O40 | 27.75  |
| BD(1)C29-C32  | BD*(1)C31-C32 | 3.56   |
| BD(1)C29-C32  | BD*(1)C31-C37 | 3.54   |
| BD(2)C29-C32  | BD*(2)C26-C27 | 24.92  |
| BD(2)C29-C32  | BD*(2)C28-C31 | 15.58  |
| BD(1)C29-H33  | BD*(1)C26-C27 | 4.06   |
| BD(1)C29-H33  | BD*(1)C31-C32 | 4.44   |
| BD(1)C31-C32  | BD*(1)C28-C31 | 4.57   |
| BD(1)C31-C32  | BD*(1)C28-O35 | 3.56   |
| BD(1)C31-C32  | BD*(1)C29-C32 | 3.26   |
| BD(1)C31-C37  | BD*(1)C31-C32 | 3.02   |
| BD(1)C32-H34  | BD*(1)C27-C29 | 3.8    |
| BD(1)C32-H34  | BD*(1)C28-C31 | 4.65   |
| BD(1)O35-H36  | BD*(1)C26-C28 | 5.31   |
| BD(1)C3-H6    | LP*(1)Si1     | 3.7    |
| BD(1)O38-H39  | BD*(1)C37-O40 | 4.21   |
| CR(2)Si1      | LP*(1)Si1     | 5.53   |
| BD(1)C7-H10   | LP*(1)Si1     | 3.75   |
| CR(1)O35      | RY*(1)C28     | 3.05   |
| CR(1)O40      | RY*(1)C37     | 6      |
| LP*(1)Si1     | RY*(3)Si1     | 5.21   |
| BD(1)C11-H13  | BD*(1)N14-C16 | 3.68   |
| LP*(1)Si1     | BD*(1)C11-N14 | 4.28   |
| LP(1)N22      | RY*(1)C24     | 5.43   |
| LP(1)N22      | BD*(1)C19-H21 | 5.51   |
| LP(1)N22      | BD*(1)C24-H25 | 10.51  |
| LP(1)O35      | RY*(1)C28     | 3.88   |
| LP(1)O35      | BD*(1)C28-C31 | 7.51   |
| LP(2)O35      | BD*(2)C28-C31 | 39.37  |
| LP(1)O38      | RY*(2)C37     | 3.06   |
| LP(1)O38      | BD*(1)C31-C37 | 6.55   |
| LP(2)O38      | BD*(2)C37-O40 | 47.35  |
| LP(1)O40      | RY*(1)C37     | 12.58  |
| LP(1)O40      | BD*(1)C31-C37 | 4.55   |
| LP(1)O40      | BD*(1)O35-H36 | 4.37   |
| LP(2)O40      | BD*(1)C31-C37 | 11.4   |
| LP(2)O40      | BD*(1)O35-H36 | 21.54  |
| LP(2)O40      | BD*(1)C37-O38 | 26.73  |
| BD*(2)C28-C31 | BD*(2)C26-C27 | 144    |
| BD*(2)C28-C31 | BD*(2)C29-C32 | 145.4  |
| BD*(2)C37-O40 | BD*(2)C28-C31 | 141.92 |

|              |               |        |
|--------------|---------------|--------|
| BD(1)O2-H23  | LP*(1)Si1     | 29.45  |
| CR(1)O2      | LP*(1)Si1     | 17.91  |
| LP(1)O2      | LP*(1)Si1     | 22.62  |
| LP(1)O2      | BD*(1)Si1-C11 | 4.24   |
| LP(2)O2      | RY*(1)Si1     | 3.68   |
| LP(2)O2      | BD*(1)Si1-C3  | 4.36   |
| LP(2)O2      | BD*(1)Si1-C7  | 8.12   |
| LP(3)O2      | LP*(1)Si1     | 274.59 |
| LP(3)O2      | BD*(1)Si1-C11 | 6.34   |
| LP(3)O2      | BD*(1)O2-H23  | 4.07   |
| BD(1)C19-H20 | BD*(2)N22-C24 | 3.26   |
| BD(1)C19-N22 | BD*(1)C24-C26 | 4.9    |
| BD(2)N22-C24 | BD*(1)C19-H20 | 3.85   |
| BD(2)N22-C24 | BD*(2)C26-C27 | 6.63   |
| BD(1)C24-H25 | BD*(1)C26-C27 | 3.85   |

***SB-H-Silanol - methanol***

| Donor NBO(i) | Acceptor NBO(j) | E(2)  |
|--------------|-----------------|-------|
| BD(1)C5-C6   | BD*(1)C1-C6     | 4.74  |
| BD(1)C5-C6   | BD*(1)C4-C5     | 4.11  |
| BD(2)C5-C6   | BD*(2)C1-C2     | 24.47 |
| BD(2)C5-C6   | BD*(2)C3-C4     | 13.43 |
| BD(2)C5-C6   | BD*(2)C16-O17   | 27.58 |
| BD(1)C6-C16  | BD*(1)C1-C6     | 3.01  |
| BD(2)C1-C2   | BD*(2)C3-C4     | 24.93 |
| BD(2)C1-C2   | BD*(2)C5-C6     | 15.59 |
| BD(2)C7-N8   | BD*(2)C3-C4     | 6.61  |
| BD(2)C7-N8   | BD*(1)C9-H32    | 3.92  |
| BD(1)C7-H35  | BD*(1)C3-C4     | 3.85  |
| BD(1)N8-C9   | BD*(1)C4-C7     | 4.87  |
| BD(1)C9-H32  | BD*(2)C7-N8     | 3.3   |
| BD(1)C1-C6   | BD*(1)C1-C2     | 3.27  |
| BD(1)C12-H28 | BD*(1)C10-N11   | 3.66  |
| BD(1)C14-H26 | LP*(1)Si13      | 3.71  |
| BD(1)C1-C6   | BD*(1)C5-C6     | 4.57  |
| BD(1)O15-H39 | BD*(1)C4-C5     | 5.32  |
| BD(1)C1-C6   | BD*(1)C5-O15    | 3.55  |
| BD(1)C19-H23 | LP*(1)Si13      | 3.71  |
| BD(1)O20-H40 | BD*(1)C16-O17   | 4.2   |
| BD(1)C1-H38  | BD*(1)C2-C3     | 3.8   |
| CR(2)Si13    | LP*(1)Si13      | 5.54  |
| CR(1)O15     | RY*(1)C5        | 3.05  |
| BD(1)C1-H38  | BD*(1)C5-C6     | 4.66  |
| CR(1)O17     | RY*(1)C16       | 6.01  |
| LP(1)N8      | RY*(1)C7        | 5.43  |
| LP(1)N8      | BD*(1)C7-H35    | 10.51 |
| LP(1)N8      | BD*(1)C9-H33    | 5.53  |

|               |                |        |
|---------------|----------------|--------|
| LP*(1)Si13    | RY*(3)Si13     | 5.24   |
| LP*(1)Si13    | BD*(1)N11-C12  | 4.22   |
| LP(1)O15      | RY*(1)C5       | 3.88   |
| LP(1)O15      | BD*(1)C5-C6    | 7.52   |
| LP(2)O15      | BD*(2)C5-C6    | 39.41  |
| LP(1)O17      | RY*(1)C16      | 12.58  |
| LP(1)O17      | BD*(1)C6-C16   | 4.55   |
| LP(1)O17      | BD*(1)O15-H39  | 4.37   |
| LP(2)O17      | BD*(1)C6-C16   | 11.43  |
| LP(2)O17      | BD*(1)O15-H39  | 21.5   |
| LP(2)O17      | BD*(1)C16-O20  | 26.77  |
| LP(1)O20      | RY*(2)C16      | 3.05   |
| BD(1)C2-C3    | BD*(1)C1-C2    | 3.09   |
| LP(1)O20      | BD*(1)C6-C16   | 6.54   |
| LP(2)O20      | BD*(2)C16-O17  | 47.12  |
| BD*(2)C5-C6   | BD*(2)C1-C2    | 146.6  |
| BD*(2)C5-C6   | BD*(2)C3-C4    | 144.72 |
| BD*(2)C16-O17 | BD*(2)C5-C6    | 149.29 |
| BD(1)C1-C2    | BD*(1)C1-C6    | 3.57   |
| BD(1)C2-C3    | BD*(1)C3-C4    | 3.26   |
| BD(1)C2-C3    | BD*(1)C4-C7    | 3.39   |
| BD(1)O18-H34  | LP*(1)Si13     | 29.51  |
| CR(1)O18      | LP*(1)Si13     | 17.94  |
| LP(1)O18      | LP*(1)Si13     | 22.74  |
| LP(1)O18      | BD*(1)C12-Si13 | 4.22   |
| BD(1)C2-H37   | BD*(1)C1-C6    | 4.44   |
| LP(2)O18      | RY*(1)Si13     | 3.69   |
| LP(2)O18      | BD*(1)Si13-C14 | 8.19   |
| LP(2)O18      | BD*(1)Si13-C19 | 4.25   |
| LP(3)O18      | LP*(1)Si13     | 275.18 |
| BD(1)C2-H37   | BD*(1)C3-C4    | 4.06   |
| LP(3)O18      | BD*(1)C12-Si13 | 6.32   |
| LP(3)O18      | BD*(1)O18-H34  | 4.1    |
| BD(1)C3-C4    | BD*(1)C2-C3    | 3.05   |
| BD(1)C3-C4    | BD*(1)C4-C5    | 4.03   |
| BD(1)C3-C4    | BD*(1)C4-C7    | 3.2    |
| BD(1)C1-C2    | BD*(1)C2-C3    | 3      |
| BD(1)C3-C4    | BD*(1)C5-O15   | 3.11   |
| BD(2)C3-C4    | BD*(2)C1-C2    | 15.94  |
| BD(2)C3-C4    | BD*(2)C5-C6    | 27.46  |
| BD(2)C3-C4    | BD*(2)C7-N8    | 16.49  |
| BD(1)C3-H36   | BD*(1)C1-C2    | 3.81   |
| BD(1)C3-H36   | BD*(1)C4-C5    | 5.09   |
| BD(1)C4-C5    | BD*(1)C3-C4    | 4.07   |
| BD(1)C4-C5    | BD*(1)C5-C6    | 3.96   |
| BD(1)C1-C2    | BD*(1)C6-C16   | 3.54   |

|            |             |      |
|------------|-------------|------|
| BD(1)C4-C7 | BD*(1)C3-C4 | 3.27 |
|------------|-------------|------|

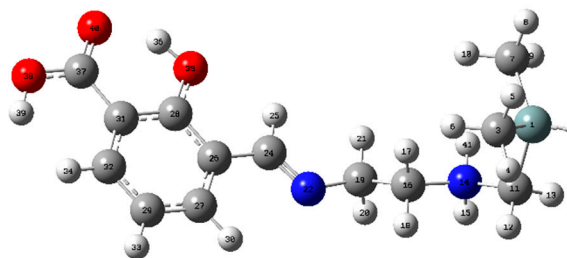

**Figure S11.** SB-H-Silanol – atoms labels for vacuum and water

|            |             |      |
|------------|-------------|------|
| BD(1)C4-C7 | BD*(1)N8-C9 | 4.58 |
|------------|-------------|------|

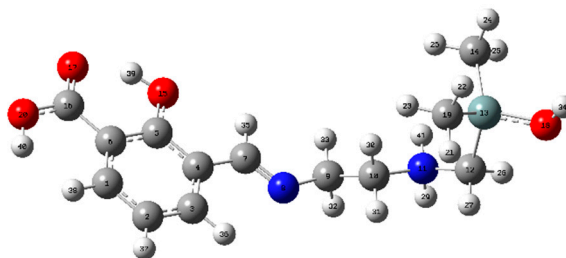

**Figure S12.** SB-H-Silanol – atoms labels for methanol

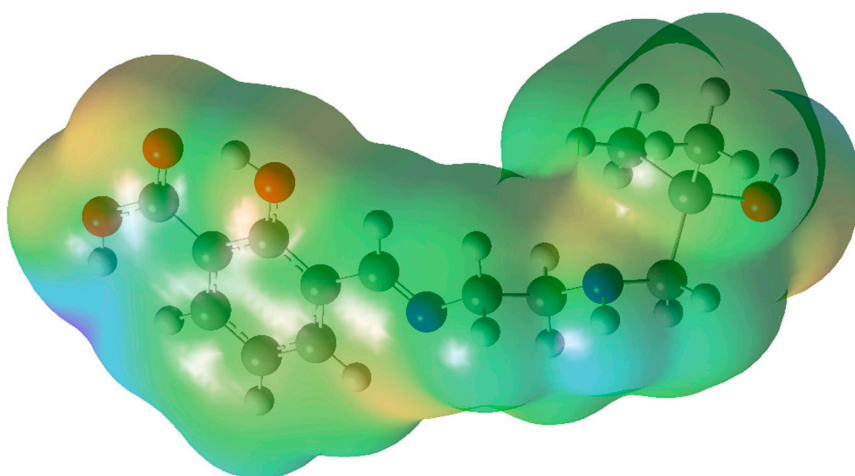

**Figure S13.** Calculation of the electrostatic potential surface (ESP), which disclosed five possible regions of protonation in the vicinity of the molecule (highlighted by yellow color). From these, one region was attributed to the secondary amino group.

**Table S24.** Geometry Optimization, XYZ Matrix for:

*AEAMDS – Vacuum*

|    |          |          |          |
|----|----------|----------|----------|
| Si | -1.64389 | 0.946078 | -0.07534 |
| O  | 0.000005 | 0.752967 | -0.00012 |
| Si | 1.643893 | 0.946057 | 0.07535  |
| C  | 2.07224  | 2.497606 | 1.047811 |
| H  | 3.152653 | 2.551371 | 1.209003 |
| H  | 1.760718 | 3.404456 | 0.521153 |
| H  | 1.588108 | 2.49581  | 2.029105 |
| C  | 2.313054 | 1.085008 | -1.67775 |
| H  | 3.39679  | 1.231954 | -1.68223 |

|   |          |          |          |
|---|----------|----------|----------|
| H | 2.089916 | 0.191134 | -2.26715 |
| H | 1.861085 | 1.941476 | -2.18803 |
| C | 2.315771 | -0.56659 | 1.00956  |
| H | 1.90625  | -0.49206 | 2.023892 |
| H | 1.918575 | -1.50996 | 0.597039 |
| C | -2.31286 | 1.084669 | 1.677859 |
| H | -2.08966 | 0.190675 | 2.267062 |
| H | -1.86084 | 1.941035 | 2.188271 |
| H | -3.39659 | 1.231611 | 1.68249  |
| C | -2.07234 | 2.49783  | -1.04743 |
| H | -1.76074 | 3.404568 | -0.52063 |
| H | -1.58833 | 2.496227 | -2.02878 |
| H | -3.15278 | 2.551641 | -1.20848 |
| C | -2.31588 | -0.56638 | -1.00979 |

|   |          |          |          |
|---|----------|----------|----------|
| H | -1.91863 | -1.50983 | -0.59751 |
| H | -1.90647 | -0.49163 | -2.02415 |
| N | 3.791256 | -0.56505 | 1.101288 |
| H | 4.069047 | -0.95253 | 1.996813 |
| N | -3.79137 | -0.56481 | -1.10135 |
| H | -4.06927 | -0.9521  | -1.99692 |
| C | 4.454643 | -1.32423 | 0.045532 |
| H | 4.142107 | -2.38718 | 0.033852 |
| H | 4.175889 | -0.91296 | -0.9271  |
| C | 5.972896 | -1.24582 | 0.183945 |
| H | 6.259692 | -1.5898  | 1.193761 |
| H | 6.272394 | -0.19678 | 0.113339 |
| C | -4.45464 | -1.32423 | -0.04568 |
| H | -4.17577 | -0.91317 | 0.92701  |
| H | -4.1421  | -2.38718 | -0.03427 |
| C | -5.97291 | -1.24579 | -0.1839  |
| H | -6.25982 | -1.58954 | -1.19376 |
| H | -6.2724  | -0.19677 | -0.11303 |
| N | -6.62029 | -1.9898  | 0.901791 |
| H | -7.62328 | -1.83836 | 0.882343 |
| H | -6.47697 | -2.98773 | 0.777016 |
| N | 6.6204   | -1.98959 | -0.90184 |
| H | 7.623395 | -1.83816 | -0.88224 |
| H | 6.477067 | -2.98754 | -0.77731 |

*There are not exist imaginary frequencies*

#### **AEAMDS – Water**

|    |          |          |          |
|----|----------|----------|----------|
| Si | -1.55701 | 0.6486   | -0.42466 |
| O  | 0.001801 | 0.230075 | -0.02117 |
| Si | 1.547993 | 0.495846 | 0.532505 |
| C  | 1.503654 | 0.952747 | 2.357014 |
| H  | 2.519179 | 1.040676 | 2.754354 |
| H  | 0.996033 | 1.909026 | 2.514186 |
| H  | 0.97933  | 0.190879 | 2.941686 |
| C  | 2.328052 | 1.898266 | -0.45107 |
| H  | 3.340554 | 2.115438 | -0.0983  |
| H  | 2.383658 | 1.661007 | -1.51733 |
| H  | 1.735631 | 2.812089 | -0.33985 |
| C  | 2.442479 | -1.16562 | 0.317417 |
| H  | 1.918165 | -1.86831 | 0.975409 |
| H  | 2.311113 | -1.55888 | -0.70536 |
| C  | -2.30938 | 1.672728 | 0.963734 |
| H  | -2.33223 | 1.119503 | 1.906923 |
| H  | -1.72273 | 2.583357 | 1.121722 |
| H  | -3.3325  | 1.975865 | 0.722771 |
| C  | -1.55205 | 1.649687 | -2.01737 |

|   |          |          |          |
|---|----------|----------|----------|
| H | -1.04685 | 2.610453 | -1.88124 |
| H | -1.04165 | 1.109199 | -2.82024 |
| H | -2.57602 | 1.85044  | -2.34606 |
| C | -2.45675 | -0.99767 | -0.71903 |
| H | -2.28661 | -1.70061 | 0.114345 |
| H | -1.97035 | -1.44835 | -1.59185 |
| N | 3.864332 | -1.12645 | 0.725184 |
| H | 4.116287 | -2.03602 | 1.09927  |
| N | -3.89494 | -0.83053 | -1.02648 |
| H | -4.17331 | -1.56337 | -1.6716  |
| C | 4.78281  | -0.82431 | -0.37262 |
| H | 4.690888 | -1.55235 | -1.20048 |
| H | 4.533985 | 0.154037 | -0.7916  |
| C | 6.229874 | -0.79482 | 0.112684 |
| H | 6.462531 | -1.75305 | 0.605413 |
| H | 6.330232 | -0.01499 | 0.873051 |
| C | -4.75902 | -0.91878 | 0.150818 |
| H | -4.47854 | -0.13781 | 0.862079 |
| H | -4.63823 | -1.88261 | 0.680193 |
| C | -6.22641 | -0.73271 | -0.22624 |
| H | -6.49431 | -1.47106 | -0.99963 |
| H | -6.35175 | 0.25662  | -0.6755  |
| N | -7.07543 | -0.80943 | 0.972579 |
| H | -8.03525 | -0.5934  | 0.719804 |
| H | -7.09286 | -1.76798 | 1.311724 |
| N | 7.136282 | -0.47692 | -1.00135 |
| H | 8.081732 | -0.36913 | -0.64591 |
| H | 7.174436 | -1.26737 | -1.64    |

*There are not exist imaginary frequencies*

#### **AEAMDS – Methanol**

|    |          |          |          |
|----|----------|----------|----------|
| Si | -1.62613 | 0.838933 | -0.05218 |
| O  | 0.000125 | 0.492216 | -0.00304 |
| Si | 1.626248 | 0.838543 | 0.052562 |
| C  | 1.917825 | 2.459774 | 0.96223  |
| H  | 2.989896 | 2.644345 | 1.077775 |
| H  | 1.487191 | 3.305087 | 0.417314 |
| H  | 1.471947 | 2.437928 | 1.96124  |
| C  | 2.26862  | 0.97496  | -1.71076 |
| H  | 3.336035 | 1.213549 | -1.72973 |
| H  | 2.11881  | 0.044387 | -2.26573 |
| H  | 1.740716 | 1.772795 | -2.24286 |
| C  | 2.416065 | -0.58484 | 1.030906 |
| H  | 2.012856 | -0.50433 | 2.047058 |
| H  | 2.078691 | -1.56488 | 0.65224  |
| C  | -2.26418 | 0.965899 | 1.713423 |

|   |          |          |          |
|---|----------|----------|----------|
| H | -2.11278 | 0.032437 | 2.263097 |
| H | -1.73524 | 1.761062 | 2.24849  |
| H | -3.33162 | 1.204047 | 1.736216 |
| C | -1.91987 | 2.465014 | -0.95245 |
| H | -1.48812 | 3.307422 | -0.40394 |
| H | -1.47614 | 2.448553 | -1.95252 |
| H | -2.9922  | 2.650117 | -1.06473 |
| C | -2.41839 | -0.57919 | -1.03611 |
| H | -2.08021 | -1.56124 | -0.66342 |
| H | -2.01769 | -0.4934  | -2.05281 |
| N | 3.891063 | -0.49198 | 1.110721 |
| H | 4.189324 | -0.87078 | 2.004147 |
| N | -3.89359 | -0.48574 | -1.11173 |
| H | -4.19411 | -0.85931 | -2.0066  |
| C | 4.583712 | -1.23275 | 0.056458 |
| H | 4.313347 | -2.30554 | 0.059164 |
| H | 4.281826 | -0.84016 | -0.91779 |
| C | 6.098032 | -1.09515 | 0.190257 |
| H | 6.400628 | -1.42281 | 1.198424 |
| H | 6.363223 | -0.03726 | 0.10799  |
| C | -4.58371 | -1.23254 | -0.06007 |
| H | -4.27937 | -0.8456  | 0.915676 |
| H | -4.31347 | -2.30532 | -0.06965 |
| C | -6.09834 | -1.09402 | -0.1894  |
| H | -6.40335 | -1.41557 | -1.19882 |
| H | -6.36327 | -0.03664 | -0.10012 |
| N | -6.77267 | -1.83477 | 0.887568 |
| H | -7.77181 | -1.65691 | 0.844748 |
| H | -6.66675 | -2.83333 | 0.727107 |
| N | 6.774884 | -1.82941 | -0.88958 |
| H | 7.773916 | -1.6518  | -0.84338 |
| H | 6.668606 | -2.82891 | -0.73538 |

*There are not exist imaginary frequencies*

#### **Silanol – Vacuum**

|    |          |          |          |
|----|----------|----------|----------|
| Si | -1.70135 | 0.110146 | -0.01906 |
| O  | -2.9955  | -0.05913 | -1.07868 |
| C  | -1.14545 | 1.908371 | 0.038785 |
| H  | -0.84012 | 2.26928  | -0.94721 |
| H  | -1.95566 | 2.55444  | 0.394032 |
| H  | -0.30357 | 2.041478 | 0.724363 |
| C  | -2.15934 | -0.45175 | 1.716165 |
| H  | -2.86493 | 0.230942 | 2.199863 |
| H  | -2.60928 | -1.44878 | 1.703118 |
| H  | -1.25931 | -0.50021 | 2.335947 |
| C  | -0.41211 | -1.07054 | -0.747   |

|   |          |          |          |
|---|----------|----------|----------|
| H | -0.23913 | -0.87198 | -1.8179  |
| H | -0.86902 | -2.06541 | -0.69891 |
| N | 0.83926  | -1.09226 | 0.039318 |
| H | 1.227048 | -2.02948 | 0.017267 |
| C | 1.857905 | -0.16117 | -0.43746 |
| H | 1.459775 | 0.855784 | -0.41352 |
| H | 2.145405 | -0.35623 | -1.48938 |
| C | 3.102893 | -0.21107 | 0.444396 |
| H | 3.473396 | -1.25095 | 0.484031 |
| H | 2.814759 | 0.058259 | 1.464031 |
| N | 4.09875  | 0.755692 | -0.02973 |
| H | 4.875276 | 0.808667 | 0.621067 |
| H | 4.487162 | 0.451642 | -0.91778 |
| H | -3.78835 | 0.456517 | -0.91928 |

*There are not exist imaginary frequencies*

#### **Silanol – Water**

|    |          |          |          |
|----|----------|----------|----------|
| Si | -1.70176 | 0.109676 | -0.01904 |
| O  | -2.97288 | -0.044   | -1.11769 |
| C  | -1.14824 | 1.90532  | 0.07148  |
| H  | -0.80726 | 2.272967 | -0.90038 |
| H  | -1.97583 | 2.541781 | 0.402112 |
| H  | -0.33211 | 2.031454 | 0.788979 |
| C  | -2.2214  | -0.46969 | 1.692451 |
| H  | -2.99078 | 0.181481 | 2.118549 |
| H  | -2.61662 | -1.48942 | 1.662888 |
| H  | -1.36288 | -0.46208 | 2.370621 |
| C  | -0.40249 | -1.0688  | -0.73563 |
| H  | -0.22192 | -0.86401 | -1.80457 |
| H  | -0.85488 | -2.06609 | -0.6936  |
| N  | 0.850426 | -1.09884 | 0.0506   |
| H  | 1.249225 | -2.02995 | -0.01778 |
| C  | 1.857575 | -0.14516 | -0.41482 |
| H  | 1.449545 | 0.867123 | -0.35486 |
| H  | 2.126587 | -0.31196 | -1.4748  |
| C  | 3.118862 | -0.21567 | 0.441884 |
| H  | 3.492242 | -1.2528  | 0.446004 |
| H  | 2.856188 | 0.030788 | 1.47461  |
| N  | 4.112626 | 0.760047 | -0.03141 |
| H  | 4.907449 | 0.765261 | 0.601073 |
| H  | 4.481414 | 0.455643 | -0.9289  |
| H  | -3.75987 | 0.481969 | -0.94849 |

*There are not exist imaginary frequencies*

#### **Silanol – Methanol**

|    |         |          |          |
|----|---------|----------|----------|
| Si | -1.7015 | 0.109686 | -0.01902 |
|----|---------|----------|----------|



|   |          |          |          |
|---|----------|----------|----------|
| O | -2.97417 | -0.04467 | -1.11559 |
| C | -1.14774 | 1.905411 | 0.069411 |
| H | -0.80754 | 2.272175 | -0.90305 |
| H | -1.97482 | 2.542532 | 0.40012  |
| H | -0.331   | 2.032164 | 0.786092 |
| C | -2.21824 | -0.46838 | 1.693818 |
| H | -2.98445 | 0.184692 | 2.122735 |
| H | -2.61638 | -1.48698 | 1.665145 |
| H | -1.35744 | -0.46355 | 2.369099 |
| C | -0.40306 | -1.06932 | -0.73606 |
| H | -0.22292 | -0.86507 | -1.80515 |
| H | -0.8558  | -2.06642 | -0.69341 |
| N | 0.84988  | -1.09904 | 0.050059 |
| H | 1.248184 | -2.03046 | -0.01655 |
| C | 1.857429 | -0.14629 | -0.41603 |
| H | 1.449534 | 0.866114 | -0.35811 |
| H | 2.12749  | -0.31466 | -1.47557 |
| C | 3.117845 | -0.21523 | 0.442084 |
| H | 3.491476 | -1.25235 | 0.448173 |
| H | 2.853749 | 0.032503 | 1.47411  |
| N | 4.111592 | 0.760255 | -0.03133 |
| H | 4.905567 | 0.767522 | 0.602142 |
| H | 4.481529 | 0.455474 | -0.92818 |
| H | -3.76055 | 0.482307 | -0.94707 |

*There are not exist imaginary frequencies*

#### **SB-Silanol – Vacuum**

|    |          |          |          |
|----|----------|----------|----------|
| Si | 5.266953 | 0.629496 | 0.458055 |
| O  | 6.509157 | 0.343009 | 1.553276 |
| C  | 3.893998 | 1.622458 | 1.279232 |
| H  | 3.498522 | 1.113684 | 2.162673 |
| H  | 4.261584 | 2.604073 | 1.59721  |
| H  | 3.065486 | 1.798484 | 0.586924 |
| C  | 5.88835  | 1.565674 | -1.04996 |
| H  | 6.154833 | 2.60053  | -0.81348 |
| H  | 6.768823 | 1.080622 | -1.48136 |
| H  | 5.109372 | 1.587506 | -1.81771 |
| C  | 4.745377 | -1.11752 | -0.05325 |
| H  | 4.572277 | -1.76588 | 0.820902 |
| H  | 5.611465 | -1.54373 | -0.57176 |
| N  | 3.598991 | -1.10417 | -0.98891 |
| H  | 3.711936 | -1.85566 | -1.66116 |
| C  | 2.303371 | -1.26573 | -0.33517 |
| H  | 2.184723 | -0.47601 | 0.41211  |
| H  | 2.205813 | -2.22402 | 0.202595 |
| C  | 1.168137 | -1.15248 | -1.35751 |

|   |          |          |          |
|---|----------|----------|----------|
| H | 1.318492 | -1.9179  | -2.13063 |
| H | 1.211929 | -0.16964 | -1.84926 |
| N | -0.11237 | -1.41366 | -0.72567 |
| H | 6.96004  | 1.094731 | 1.942658 |
| C | -1.01803 | -0.52703 | -0.81917 |
| H | -0.86354 | 0.412074 | -1.36135 |
| C | -2.34526 | -0.70621 | -0.20095 |
| C | -2.65501 | -1.86202 | 0.513384 |
| C | -3.31984 | 0.310493 | -0.32113 |
| C | -3.89907 | -2.03583 | 1.115205 |
| H | -1.88452 | -2.61974 | 0.590202 |
| C | -4.60234 | 0.131937 | 0.265051 |
| C | -4.85753 | -1.04318 | 0.989337 |
| H | -4.11433 | -2.93388 | 1.680376 |
| H | -5.81139 | -1.18823 | 1.488356 |
| O | -2.99488 | 1.418721 | -0.99588 |
| H | -3.77048 | 2.028852 | -0.94695 |
| C | -5.60412 | 1.207139 | 0.092809 |
| O | -6.86301 | 1.001176 | 0.523611 |
| H | -6.97874 | 0.092757 | 0.823296 |
| O | -5.34429 | 2.277966 | -0.42996 |

*There are not exist imaginary frequencies*

#### **SB-Silanol – water**

|    |          |          |          |
|----|----------|----------|----------|
| Si | 5.274507 | 0.617655 | 0.46852  |
| O  | 6.595021 | 0.25218  | 1.452503 |
| C  | 3.94859  | 1.490141 | 1.477976 |
| H  | 3.593623 | 0.86679  | 2.303519 |
| H  | 4.344412 | 2.418787 | 1.902431 |
| H  | 3.087921 | 1.75609  | 0.857136 |
| C  | 5.793103 | 1.716744 | -0.96551 |
| H  | 6.128875 | 2.697252 | -0.61417 |
| H  | 6.607506 | 1.263148 | -1.5381  |
| H  | 4.951722 | 1.875551 | -1.64644 |
| C  | 4.764188 | -1.09207 | -0.17076 |
| H  | 4.626057 | -1.8048  | 0.65966  |
| H  | 5.624041 | -1.46025 | -0.7416  |
| N  | 3.595768 | -1.05374 | -1.07851 |
| H  | 3.691728 | -1.80399 | -1.75586 |
| C  | 2.316846 | -1.23125 | -0.39233 |
| H  | 2.204702 | -0.44458 | 0.358877 |
| H  | 2.251513 | -2.19312 | 0.14385  |
| C  | 1.156793 | -1.13543 | -1.38808 |
| H  | 1.299801 | -1.90039 | -2.16233 |
| H  | 1.173013 | -0.15324 | -1.88174 |
| N  | -0.10977 | -1.40803 | -0.72725 |

|   |          |          |          |
|---|----------|----------|----------|
| H | 7.023709 | 0.990971 | 1.894339 |
| C | -1.02652 | -0.53009 | -0.81481 |
| H | -0.88028 | 0.403118 | -1.36826 |
| C | -2.3481  | -0.70714 | -0.18559 |
| C | -2.65454 | -1.85436 | 0.547241 |
| C | -3.3289  | 0.301308 | -0.32043 |
| C | -3.89833 | -2.02651 | 1.14817  |
| H | -1.8866  | -2.61257 | 0.639153 |
| C | -4.60991 | 0.126752 | 0.27094  |
| C | -4.86321 | -1.04092 | 1.007651 |
| H | -4.11247 | -2.91915 | 1.721421 |
| H | -5.81933 | -1.19281 | 1.496639 |
| O | -3.01187 | 1.402808 | -1.01588 |
| H | -3.79913 | 1.999758 | -0.98369 |
| C | -5.61651 | 1.193112 | 0.088109 |
| O | -6.86178 | 1.019086 | 0.549721 |
| H | -6.99428 | 0.138721 | 0.923171 |
| O | -5.3667  | 2.250725 | -0.47916 |

*There are not exist imaginary frequencies*

#### ***SB-Silanol – methanol***

|    |          |          |          |
|----|----------|----------|----------|
| Si | 5.27411  | 0.617941 | 0.468622 |
| O  | 6.59367  | 0.253365 | 1.453863 |
| C  | 3.94713  | 1.491128 | 1.476231 |
| H  | 3.592015 | 0.868702 | 2.3024   |
| H  | 4.341864 | 2.420628 | 1.89984  |
| H  | 3.086684 | 1.75579  | 0.854544 |
| C  | 5.793303 | 1.715932 | -0.96607 |
| H  | 6.124962 | 2.698443 | -0.61639 |
| H  | 6.610656 | 1.263685 | -1.53551 |
| H  | 4.953188 | 1.870162 | -1.6496  |
| C  | 4.76409  | -1.09207 | -0.16997 |
| H  | 4.626312 | -1.80457 | 0.660695 |
| H  | 5.62408  | -1.46016 | -0.74065 |
| N  | 3.595693 | -1.05387 | -1.07761 |
| H  | 3.692078 | -1.80316 | -1.75593 |
| C  | 2.316739 | -1.23227 | -0.39191 |
| H  | 2.204107 | -0.44606 | 0.359699 |
| H  | 2.251313 | -2.19439 | 0.143821 |
| C  | 1.156966 | -1.13609 | -1.38796 |
| H  | 1.299877 | -1.90112 | -2.16218 |
| H  | 1.173867 | -0.15391 | -1.88166 |
| N  | -0.10978 | -1.4083  | -0.72751 |
| H  | 7.02229  | 0.991737 | 1.896276 |
| C  | -1.02629 | -0.5302  | -0.81532 |
| H  | -0.88001 | 0.40303  | -1.36877 |

|   |          |          |          |
|---|----------|----------|----------|
| C | -2.34783 | -0.70715 | -0.18598 |
| C | -2.65394 | -1.85414 | 0.547186 |
| C | -3.32873 | 0.30122  | -0.3209  |
| C | -3.89763 | -2.02625 | 1.148429 |
| H | -1.88573 | -2.61208 | 0.639092 |
| C | -4.60957 | 0.126803 | 0.270881 |
| C | -4.86255 | -1.04076 | 1.007937 |
| H | -4.11148 | -2.91877 | 1.721999 |
| H | -5.81852 | -1.1926  | 1.497339 |
| O | -3.01189 | 1.402371 | -1.01682 |
| H | -3.79897 | 1.999526 | -0.98472 |
| C | -5.6161  | 1.19331  | 0.088191 |
| O | -6.86126 | 1.019154 | 0.550694 |
| H | -6.99273 | 0.138755 | 0.924226 |
| O | -5.36656 | 2.250554 | -0.47946 |

*There are not exist imaginary frequencies*

#### ***SB-H-Silanol – Vacuum***

|    |          |          |          |
|----|----------|----------|----------|
| Si | 5.224964 | 0.637735 | 0.586657 |
| O  | 6.876125 | 0.523742 | 0.565725 |
| C  | 4.497982 | 0.530302 | 2.303053 |
| H  | 4.820947 | -0.37737 | 2.819845 |
| H  | 4.814088 | 1.384931 | 2.909294 |
| H  | 3.403844 | 0.54161  | 2.291934 |
| C  | 4.5866   | 2.122661 | -0.36457 |
| H  | 4.887868 | 3.041557 | 0.148259 |
| H  | 5.002465 | 2.181765 | -1.37537 |
| H  | 3.493314 | 2.160695 | -0.42846 |
| C  | 4.855256 | -0.94877 | -0.45691 |
| H  | 4.791221 | -1.8459  | 0.160734 |
| H  | 5.701167 | -1.075   | -1.13641 |
| N  | 3.606115 | -0.92282 | -1.31838 |
| H  | 3.653192 | -1.67845 | -2.00741 |
| C  | 2.295886 | -1.05094 | -0.57555 |
| H  | 2.240122 | -0.22078 | 0.127578 |
| H  | 2.332161 | -1.98465 | -0.01507 |
| C  | 1.103297 | -1.04689 | -1.53423 |
| H  | 1.233899 | -1.8514  | -2.27196 |
| H  | 1.056078 | -0.09164 | -2.08458 |
| N  | -0.08247 | -1.32063 | -0.75455 |
| H  | 7.439413 | 1.000467 | 1.179699 |
| C  | -1.07829 | -0.53208 | -0.90009 |
| H  | -1.03673 | 0.329548 | -1.57503 |
| C  | -2.34456 | -0.7143  | -0.19303 |
| C  | -2.58064 | -1.82759 | 0.618694 |
| C  | -3.3544  | 0.266347 | -0.34208 |

|   |          |          |          |
|---|----------|----------|----------|
| C | -3.7882  | -1.98916 | 1.284929 |
| H | -1.79207 | -2.5641  | 0.713018 |
| C | -4.60159 | 0.094914 | 0.318428 |
| C | -4.78274 | -1.03036 | 1.130625 |
| H | -3.95707 | -2.85123 | 1.916874 |
| H | -5.71143 | -1.17294 | 1.674683 |
| O | -3.09347 | 1.328364 | -1.10419 |
| H | -3.89703 | 1.913578 | -1.07167 |
| C | -5.63897 | 1.138942 | 0.117793 |
| O | -6.85946 | 0.966529 | 0.639318 |
| H | -6.95912 | 0.097545 | 1.043937 |
| O | -5.41603 | 2.158074 | -0.51388 |
| H | 3.593569 | -0.0545  | -1.86083 |

*There are not exist imaginary frequencies*

### **SB-H-Silanol – Water**

|    |          |          |          |
|----|----------|----------|----------|
| Si | 5.222865 | 0.558406 | 0.64398  |
| O  | 6.826941 | 0.16666  | 0.907992 |
| C  | 4.211342 | 0.397558 | 2.209517 |
| H  | 4.231522 | -0.62508 | 2.594865 |
| H  | 4.615524 | 1.059474 | 2.981847 |
| H  | 3.167985 | 0.685094 | 2.053099 |
| C  | 5.027909 | 2.247018 | -0.13925 |
| H  | 5.375825 | 3.015638 | 0.557948 |
| H  | 5.615077 | 2.335506 | -1.05737 |
| H  | 3.983696 | 2.47581  | -0.37381 |
| C  | 4.842977 | -0.82607 | -0.63507 |
| H  | 4.807529 | -1.80009 | -0.14552 |
| H  | 5.675567 | -0.84548 | -1.34048 |
| N  | 3.588927 | -0.7218  | -1.47444 |
| H  | 3.653774 | -1.40681 | -2.23179 |
| C  | 2.297939 | -0.94958 | -0.73343 |
| H  | 2.214044 | -0.17169 | 0.022907 |
| H  | 2.378779 | -1.9171  | -0.24057 |
| C  | 1.093648 | -0.92108 | -1.67709 |
| H  | 1.216398 | -1.69732 | -2.44123 |
| H  | 1.025412 | 0.050569 | -2.18602 |
| N  | -0.09123 | -1.23501 | -0.8978  |
| H  | 7.27524  | 0.577667 | 1.653116 |
| C  | -1.07537 | -0.42898 | -0.97045 |
| H  | -1.03914 | 0.471482 | -1.59062 |
| C  | -2.32783 | -0.65276 | -0.23225 |
| C  | -2.49721 | -1.76726 | 0.5913   |
| C  | -3.38284 | 0.280237 | -0.35267 |
| C  | -3.67778 | -1.97794 | 1.296272 |
| H  | -1.67508 | -2.4678  | 0.669919 |

|   |          |          |          |
|---|----------|----------|----------|
| C | -4.60044 | 0.064058 | 0.348898 |
| C | -4.71585 | -1.06636 | 1.171694 |
| H | -3.78816 | -2.84284 | 1.937167 |
| H | -5.62086 | -1.24873 | 1.740801 |
| O | -3.19531 | 1.348985 | -1.13762 |
| H | -4.01932 | 1.893801 | -1.08342 |
| C | -5.68781 | 1.051561 | 0.18212  |
| O | -6.87603 | 0.840061 | 0.761152 |
| H | -6.92006 | -0.0124  | 1.212103 |
| O | -5.55433 | 2.076542 | -0.4769  |
| H | 3.55983  | 0.19     | -1.93763 |

*There are not exist imaginary frequencies*

### **SB-H-Silanol – Methanol**

|    |          |          |          |
|----|----------|----------|----------|
| C  | -4.73784 | -1.10928 | 1.123052 |
| C  | -3.69767 | -2.02162 | 1.222706 |
| C  | -2.51155 | -1.78042 | 0.537241 |
| C  | -2.338   | -0.63379 | -0.24013 |
| C  | -3.39463 | 0.300435 | -0.33374 |
| C  | -4.61892 | 0.051975 | 0.345113 |
| C  | -1.07987 | -0.37834 | -0.95792 |
| N  | -0.09639 | -1.18714 | -0.91224 |
| C  | 1.093596 | -0.84384 | -1.67029 |
| C  | 2.295677 | -0.94031 | -0.72865 |
| N  | 3.593109 | -0.72797 | -1.46312 |
| C  | 4.84265  | -0.8525  | -0.6193  |
| Si | 5.249902 | 0.541128 | 0.64196  |
| C  | 5.040707 | 2.223999 | -0.15065 |
| O  | -3.20272 | 1.400356 | -1.07292 |
| C  | -5.70936 | 1.04039  | 0.203471 |
| O  | -5.5704  | 2.094202 | -0.40678 |
| O  | 6.858449 | 0.15223  | 0.877555 |
| C  | 4.267482 | 0.386784 | 2.226485 |
| O  | -6.90644 | 0.795608 | 0.750237 |
| H  | 4.306825 | -0.63226 | 2.620164 |
| H  | 4.675765 | 1.060102 | 2.986551 |
| H  | 3.217875 | 0.659548 | 2.085589 |
| H  | 5.402571 | 2.996352 | 0.535247 |
| H  | 5.612788 | 2.305586 | -1.07893 |
| H  | 3.993403 | 2.45522  | -0.36823 |
| H  | 4.783477 | -1.81959 | -0.11856 |
| H  | 5.676432 | -0.89881 | -1.32202 |
| H  | 3.649579 | -1.4111  | -2.22288 |
| H  | 2.236031 | -0.18673 | 0.054088 |
| H  | 2.346523 | -1.92616 | -0.26914 |
| H  | 1.208851 | -1.57708 | -2.47708 |

|   |          |          |          |
|---|----------|----------|----------|
| H | 1.038734 | 0.155598 | -2.12481 |
| H | 7.318777 | 0.559946 | 1.61708  |
| H | -1.03917 | 0.547786 | -1.53886 |
| H | -1.68805 | -2.4813  | 0.595642 |
| H | -3.81075 | -2.9106  | 1.829282 |
| H | -5.64721 | -1.31532 | 1.677005 |
| H | -4.02805 | 1.941439 | -1.00331 |
| H | -6.95366 | -0.07872 | 1.156805 |
| H | 3.578871 | 0.185982 | -1.92258 |

*There are not exist imaginary frequencies*

#### **APTMDS – Vacuum**

|    |          |          |          |
|----|----------|----------|----------|
| Si | 1.498994 | -1.02285 | 0.683972 |
| O  | 0.009879 | -1.30248 | 0.012585 |
| Si | -1.46533 | -1.02237 | -0.68897 |
| C  | 2.421304 | -2.66316 | 0.726866 |
| H  | 3.409253 | -2.55724 | 1.186071 |
| H  | 1.86466  | -3.40716 | 1.304257 |
| H  | 2.561886 | -3.06264 | -0.28189 |
| C  | -1.22875 | -0.88033 | -2.55302 |
| H  | -0.57431 | -0.04017 | -2.80432 |
| H  | -0.77471 | -1.78905 | -2.95947 |
| H  | -2.18165 | -0.72669 | -3.06944 |
| C  | 1.267485 | -0.37571 | 2.438522 |
| H  | 2.227318 | -0.22075 | 2.941412 |
| H  | 0.730091 | 0.57722  | 2.443143 |
| H  | 0.690824 | -1.08474 | 3.040096 |
| C  | -2.57263 | -2.49285 | -0.29477 |
| H  | -2.12151 | -3.42296 | -0.6528  |
| H  | -2.72555 | -2.59072 | 0.784045 |
| H  | -3.55622 | -2.39821 | -0.76549 |
| C  | 2.413687 | 0.240209 | -0.38231 |
| H  | 1.809188 | 1.151901 | -0.44545 |
| H  | 2.461954 | -0.15739 | -1.40518 |
| C  | -2.18448 | 0.574298 | 0.019334 |
| H  | -1.4551  | 1.377784 | -0.15196 |
| H  | -2.26427 | 0.470339 | 1.106936 |
| C  | -3.55324 | 1.009885 | -0.53152 |
| H  | -4.27491 | 0.185578 | -0.45131 |
| H  | -3.47858 | 1.241637 | -1.60021 |
| C  | -4.14241 | 2.232532 | 0.184172 |
| H  | -3.42013 | 3.054671 | 0.135454 |
| H  | -5.04117 | 2.565905 | -0.36071 |
| C  | 3.830207 | 0.627831 | 0.076207 |
| H  | 3.815473 | 0.948593 | 1.126709 |
| H  | 4.496371 | -0.24176 | 0.036404 |

|   |          |          |          |
|---|----------|----------|----------|
| C | 4.459511 | 1.752    | -0.75713 |
| H | 5.515609 | 1.866781 | -0.46174 |
| H | 4.45674  | 1.456974 | -1.81216 |
| N | 3.68167  | 2.992094 | -0.6386  |
| H | 3.798089 | 3.386125 | 0.290772 |
| H | 4.021056 | 3.688619 | -1.2937  |
| N | -4.39281 | 1.941942 | 1.601738 |
| H | -4.64763 | 2.788947 | 2.098792 |
| H | -5.17922 | 1.304726 | 1.691023 |

*There are not exist imaginary frequencies*

#### **APTMDS – Water**

|    |          |          |          |
|----|----------|----------|----------|
| Si | 1.495529 | -1.08217 | 0.682784 |
| O  | 0.010282 | -1.47558 | 0.039846 |
| Si | -1.44952 | -1.10254 | -0.67024 |
| C  | 2.537993 | -2.64854 | 0.66535  |
| H  | 3.525791 | -2.47213 | 1.102353 |
| H  | 2.056173 | -3.44411 | 1.241829 |
| H  | 2.683674 | -3.013   | -0.35609 |
| C  | -1.20262 | -0.97838 | -2.53334 |
| H  | -0.50758 | -0.1724  | -2.78753 |
| H  | -0.7979  | -1.91192 | -2.93618 |
| H  | -2.14906 | -0.77785 | -3.04536 |
| C  | 1.25351  | -0.49081 | 2.454605 |
| H  | 2.211502 | -0.25861 | 2.930267 |
| H  | 0.635254 | 0.411285 | 2.488815 |
| H  | 0.760847 | -1.25983 | 3.057483 |
| C  | -2.63364 | -2.51029 | -0.27395 |
| H  | -2.24107 | -3.46293 | -0.64252 |
| H  | -2.78724 | -2.6038  | 0.80539  |
| H  | -3.61119 | -2.35094 | -0.73945 |
| C  | 2.283246 | 0.269643 | -0.37574 |
| H  | 1.612305 | 1.135786 | -0.38586 |
| H  | 2.320716 | -0.09514 | -1.4112  |
| C  | -2.07816 | 0.532485 | 0.036881 |
| H  | -1.31189 | 1.297305 | -0.14931 |
| H  | -2.14563 | 0.432977 | 1.125762 |
| C  | -3.43091 | 1.03184  | -0.50149 |
| H  | -4.19818 | 0.256538 | -0.37665 |
| H  | -3.36269 | 1.218256 | -1.57917 |
| C  | -3.93242 | 2.31625  | 0.170472 |
| H  | -3.16606 | 3.093336 | 0.074821 |
| H  | -4.81985 | 2.676027 | -0.3733  |
| C  | 3.688207 | 0.733711 | 0.048658 |
| H  | 3.681439 | 1.05068  | 1.099804 |
| H  | 4.394814 | -0.10182 | -0.00994 |

|   |          |          |          |
|---|----------|----------|----------|
| C | 4.246441 | 1.885482 | -0.79651 |
| H | 5.300329 | 2.046998 | -0.52092 |
| H | 4.236694 | 1.592722 | -1.85221 |
| N | 3.425809 | 3.100327 | -0.65892 |
| H | 3.543696 | 3.476412 | 0.278884 |
| H | 3.773838 | 3.818336 | -1.28788 |
| N | -4.18554 | 2.108281 | 1.606084 |
| H | -4.43817 | 2.992595 | 2.037836 |
| H | -4.99882 | 1.507217 | 1.716196 |

*There are not exist imaginary frequencies*

### **APTMDS – Methanol**

|    |          |          |          |
|----|----------|----------|----------|
| Si | 1.493741 | -1.07987 | 0.682601 |
| O  | 0.010298 | -1.47151 | 0.03537  |
| Si | -1.45215 | -1.10182 | -0.6702  |
| C  | 2.532341 | -2.64891 | 0.675077 |
| H  | 3.5183   | -2.47407 | 1.116855 |
| H  | 2.045292 | -3.4417  | 1.250973 |
| H  | 2.682406 | -3.0166  | -0.34457 |
| C  | -1.21208 | -0.9857  | -2.53475 |
| H  | -0.51801 | -0.18077 | -2.79488 |
| H  | -0.80855 | -1.92087 | -2.93498 |
| H  | -2.16026 | -0.78751 | -3.04449 |
| C  | 1.247189 | -0.48099 | 2.451315 |
| H  | 2.204135 | -0.25144 | 2.930368 |
| H  | 0.632788 | 0.423923 | 2.479913 |
| H  | 0.748455 | -1.24566 | 3.054739 |
| C  | -2.63512 | -2.50771 | -0.26385 |
| H  | -2.2426  | -3.46218 | -0.6277  |
| H  | -2.78651 | -2.59533 | 0.816298 |
| H  | -3.61368 | -2.35166 | -0.72835 |
| C  | 2.289195 | 0.265577 | -0.37823 |
| H  | 1.620347 | 1.133234 | -0.39557 |
| H  | 2.330752 | -0.10396 | -1.41186 |
| C  | -2.07828 | 0.536329 | 0.031859 |
| H  | -1.31372 | 1.30085  | -0.16239 |
| H  | -2.14002 | 0.442701 | 1.121595 |
| C  | -3.43432 | 1.03176  | -0.50181 |
| H  | -4.1999  | 0.25584  | -0.37042 |
| H  | -3.37167 | 1.214424 | -1.5805  |
| C  | -3.93436 | 2.317762 | 0.168243 |
| H  | -3.16929 | 3.095342 | 0.0667   |
| H  | -4.82464 | 2.674867 | -0.37276 |
| C  | 3.69313  | 0.7286   | 0.050622 |
| H  | 3.682508 | 1.048807 | 1.100777 |
| H  | 4.398666 | -0.10824 | -0.00246 |

|   |          |          |          |
|---|----------|----------|----------|
| C | 4.256596 | 1.877069 | -0.79559 |
| H | 5.309833 | 2.037408 | -0.51663 |
| H | 4.250127 | 1.581462 | -1.8505  |
| N | 3.437423 | 3.093417 | -0.66418 |
| H | 3.552316 | 3.472173 | 0.272875 |
| H | 3.787715 | 3.809091 | -1.29447 |
| N | -4.18055 | 2.11384  | 1.605499 |
| H | -4.4304  | 2.99922  | 2.036564 |
| H | -4.99295 | 1.512811 | 1.721677 |

*There are not exist imaginary frequencies*

### **CLMTMDS – Vacuum**

|    |          |          |          |
|----|----------|----------|----------|
| Si | 1.21899  | -1.07308 | -0.2156  |
| O  | 0.000021 | 0.000044 | -0.5142  |
| Si | -1.219   | 1.073105 | -0.21558 |
| C  | -1.17472 | 1.671906 | 1.557791 |
| H  | -0.22136 | 2.162043 | 1.773904 |
| H  | -1.97433 | 2.394965 | 1.746665 |
| H  | -1.29918 | 0.845328 | 2.261574 |
| C  | -1.08781 | 2.493156 | -1.43474 |
| H  | -1.12422 | 2.137188 | -2.46807 |
| H  | -1.8963  | 3.217682 | -1.29754 |
| H  | -0.13995 | 3.021601 | -1.29765 |
| C  | 1.087692 | -2.49312 | -1.43476 |
| H  | 0.139906 | -3.02165 | -1.2975  |
| H  | 1.123854 | -2.13711 | -2.46809 |
| H  | 1.89627  | -3.21758 | -1.29775 |
| C  | 1.174689 | -1.67188 | 1.557777 |
| H  | 1.299163 | -0.84529 | 2.261551 |
| H  | 0.221323 | -2.162   | 1.77389  |
| H  | 1.974288 | -2.39495 | 1.746665 |
| C  | 2.86149  | -0.17717 | -0.56296 |
| H  | 3.724733 | -0.82558 | -0.40688 |
| H  | 2.904915 | 0.205625 | -1.58295 |
| C  | -2.86147 | 0.17713  | -0.56295 |
| H  | -3.72473 | 0.825508 | -0.40687 |
| H  | -2.90487 | -0.20567 | -1.58293 |
| Cl | -3.11136 | -1.26898 | 0.528567 |
| Cl | 3.111433 | 1.26892  | 0.528553 |

*There are not exist imaginary frequencies*

### **CLMTMDS – water**

|    |          |          |          |
|----|----------|----------|----------|
| Si | 1.503125 | -0.61766 | -0.61598 |
| O  | -0.00011 | -0.30222 | -0.00082 |
| Si | -1.50266 | -0.6175  | 0.616063 |
| C  | -2.39946 | -1.87238 | -0.44584 |

|    |          |          |          |
|----|----------|----------|----------|
| H  | -1.8671  | -2.828   | -0.44085 |
| H  | -3.40975 | -2.04905 | -0.06446 |
| H  | -2.48156 | -1.53541 | -1.48224 |
| C  | -1.36882 | -1.18113 | 2.399612 |
| H  | -0.85053 | -0.43954 | 3.013554 |
| H  | -2.35922 | -1.34952 | 2.832893 |
| H  | -0.81193 | -2.12072 | 2.461938 |
| C  | 1.370954 | -1.18257 | -2.39924 |
| H  | 0.814114 | -2.12219 | -2.46145 |
| H  | 0.853236 | -0.44139 | -3.01417 |
| H  | 2.361759 | -1.35125 | -2.83149 |
| C  | 2.399179 | -1.87153 | 0.447734 |
| H  | 2.480537 | -1.53354 | 1.483861 |
| H  | 1.866783 | -2.82714 | 0.443302 |
| H  | 3.409728 | -2.0486  | 0.067257 |
| C  | 2.446715 | 1.03382  | -0.62896 |
| H  | 3.448683 | 0.923284 | -1.04337 |
| H  | 1.920886 | 1.798139 | -1.20024 |
| C  | -2.44661 | 1.033778 | 0.628571 |
| H  | -3.44822 | 0.923336 | 1.043855 |
| H  | -1.92051 | 1.798678 | 1.198822 |
| Cl | -2.67934 | 1.739077 | -1.05249 |
| Cl | 2.67791  | 1.740514 | 1.051712 |
| Cl | 2.67791  | 1.740514 | 1.051712 |

*There are not exist imaginary frequencies*

### ***CIMTMDS – methanol***

|    |           |          |          |
|----|-----------|----------|----------|
| Si | 1.49367   | -0.6019  | -0.64892 |
| O  | -0.000067 | -0.3157  | -0.0005  |
| Si | -1.493331 | -0.60163 | 0.649129 |
| C  | -2.407909 | -1.89373 | -0.35138 |
| H  | -1.881443 | -2.85181 | -0.31153 |
| H  | -3.415911 | -2.0482  | 0.045332 |
| H  | -2.49716  | -1.59925 | -1.40005 |
| C  | -1.333664 | -1.09984 | 2.449957 |
| H  | -0.807908 | -0.3364  | 3.029774 |
| H  | -2.317576 | -1.25398 | 2.902875 |
| H  | -0.774227 | -2.03592 | 2.537758 |
| C  | 1.335139  | -1.10158 | -2.44944 |
| H  | 0.775844  | -2.03778 | -2.53682 |
| H  | 0.809658  | -0.33865 | -3.03018 |
| H  | 2.319338  | -1.25598 | -2.90164 |
| C  | 2.407874  | -1.89304 | 0.353174 |
| H  | 2.496467  | -1.5977  | 1.401656 |
| H  | 1.881593  | -2.85124 | 0.313793 |
| H  | 3.416133  | -2.04766 | -0.04283 |

|    |           |          |          |
|----|-----------|----------|----------|
| C  | 2.43463   | 1.050755 | -0.61326 |
| H  | 3.428304  | 0.960757 | -1.05196 |
| H  | 1.895562  | 1.836445 | -1.14159 |
| C  | -2.434604 | 1.050831 | 0.612678 |
| H  | -3.42801  | 0.961001 | 1.052019 |
| H  | -1.895381 | 1.837049 | 1.140065 |
| Cl | -2.698704 | 1.686208 | -1.09114 |
| Cl | 2.697629  | 1.687556 | 1.090194 |

*There are not exist imaginary frequencie*
